# Supplementary material
Source: PubMed Central journal article supplement (PMC3457532)
Supplement: MCB.00068-12_zmb999109667so2.pdf [file MCB.00068-12_zmb999109667so2.pdf]

Suppl. Table 1 : Genes altered during proliferation arrest in monolayer cultures

| Probe ID    | Gene Symbol | Chromosome    | Transcript  | Biological process            | Molecular function           | P value    | Fold change | Shape |
|-------------|-------------|---------------|-------------|-------------------------------|------------------------------|------------|-------------|-------|
| 205064_at   | SPRR1B      | chr1q21-q22   | g4507186    | epidermis development         | structural molecule activity | 0.04724317 | 14.90160963 | UP    |
| 204734_at   | KRT15       | chr17q21.2    | g4504914    | epidermis development         | structural molecule activity | 0.00163853 | 14.14475139 | UP    |
|             |             |               |             |                               | carbonate dehydratase        |            |             |       |
| 209301_at   | CA2         | chr8q22       | g179794     | kidney development            | activity                     | 0.01107622 | 12.05347986 | UP    |
| 202917_s_at | S100A8      | chr1q21       | g9845519    | chemotaxis                    | calcium ion binding          | 0.01867846 | 9.884514329 | UP    |
| 208650_s_at | CD24        | chr6q21       | Hs.286124.1 | response to hypoxia           | signal transducer activity   | 0.00411693 | 6.979471914 | UP    |
| 266_s_at    | CD24        | chr6q21       | L33930      | response to hypoxia           | signal transducer activity   | 0.0007097  | 6.854250486 | UP    |
| 209771_x_at | CD24        | chr6q21       | Hs.286124.0 | response to hypoxia           | signal transducer activity   | 0.00371731 | 6.64308068  | UP    |
| 209772_s_at | CD24        | chr6q21       | g396167     | response to hypoxia           | signal transducer activity   | 0.00360138 | 6.418304556 | UP    |
| 204351_at   | S100P       | chr4p16       | g5174662    | endothelial cell migration    | magnesium ion binding        | 0.03240656 | 5.904163882 | UP    |
| 216379_x_at | CD24        | chr6q21       | Hs.332045.0 | response to hypoxia           | signal transducer activity   | 0.0010966  | 5.75918783  | UP    |
| 209800_at   | KRT16       | chr17q21.2    | g4091878    | cytoskeleton organization     | structural molecule activity | 0.03590442 | 5.634181737 | UP    |
| 208651_x_at | CD24        | chr6q21       | g180167     | response to hypoxia           | signal transducer activity   | 0.00432804 | 5.407119742 | UP    |
| 203535_at   | S100A9      | chr1q21       | g9845520    | chemotaxis                    | signal transducer activity   | 0.03354197 | 5.404623779 | UP    |
|             |             |               |             | regulation of translational   |                              |            |             |       |
| 201841_s_at | HSPB1       | chr7q11.23    | g4996892    | initiation                    | protein binding              | 0.00069271 | 4.437596829 | UP    |
| 205547_s_at | TAGLN       | chr11q23.2    | g12621918   | muscle organ development      | actin binding                | 0.0012673  | 4.152991515 | UP    |
| 202489_s_at | FXYD3       | chr19q13.12   | g13528881   | transport                     | ion channel activity         | 0.00059687 | 3.85517949  | UP    |
| 207847_s_at | MUC1        | chr1q21       | g4505282    | female pregnancy              | NA                           | 0.03500206 | 3.659692995 | UP    |
|             |             |               |             |                               | endopeptidase inhibitor      |            |             |       |
| 203691_at   | PI3         | chr20q13.12   | g4505786    | copulation                    | activity                     | 0.01671699 | 3.587142105 | UP    |
|             |             |               |             | calcium-independent cell-cell |                              |            |             |       |
| 202790_at   | CLDN7       | chr17p13      | g10835007   | adhesion                      | structural molecule activity | 0.00059356 | 3.570325645 | UP    |
|             |             |               |             | response to reactive oxygen   |                              |            |             |       |
| 202628_s_at | SERPINE1    | chr7q21.3-q22 | g10835158   | species                       | protease binding             | 0.0001663  | 3.454999808 | UP    |
|             |             |               |             |                               | carbonate dehydratase        |            |             |       |
| 205199_at   | CA9         | chr9p12       | g9955947    | response to hypoxia           | activity                     | 0.04687992 | 3.323767385 | UP    |
| 205157_s_at | KRT17       | chr17q21.2    | g4557700    | epidermis development         | structural molecule activity | 0.00061039 | 3.297775094 | UP    |
| 202388_at   | RGS2        | chr1q31       | g4506516    | cell cycle                    | signal transducer activity   | 0.00291131 | 3.295745276 | UP    |
|             |             |               |             |                               | endopeptidase inhibitor      |            |             |       |
| 41469_at    | PI3         | chr20q13.12   | 4862113_RC  | copulation                    | activity                     | 0.01429812 | 3.135199736 | UP    |
| 219630_at   | PDZK1IP1    | chr1p33       | g5031656    | NA                            | NA                           | 0.00334573 | 3.129679286 | UP    |
| 213693_s_at | MUC1        | chr1q21       | Hs.89603.6  | female pregnancy              | NA                           | 0.01883448 | 3.08972009  | UP    |
| 200632_s_at | NDRG1       | chr8q24.3     | g5174656    | response to metal ion         | protein binding              | 0.02622175 | 3.078991889 | UP    |
| 209118_s_at | TUBA1A      | chr12q13.12   | g4929133    | microtubule-based process     | nucleotide binding           | 0.00476844 | 3.0494502   | UP    |

|             |           |                  |             |                                                        |                                                             |            |                |
|-------------|-----------|------------------|-------------|--------------------------------------------------------|-------------------------------------------------------------|------------|----------------|
| 212657_s_at | IL1RN     | chr2q14.2        | Hs.81134.0  | chronic inflammatory response to antigenic stimulus    | receptor activity                                           | 0.02522971 | 2.976653359 UP |
| 207935_s_at | KRT13     | chr17q12-q21.2   | g4504910    | epidermis development                                  | structural molecule activity                                | 0.03387237 | 2.97097404 UP  |
| 205595_at   | DSG3      | chr18q12.1       | g4503404    | cell adhesion                                          | calcium ion binding                                         | 0.0076782  | 2.883585674 UP |
| 204597_x_at | STC1      | chr8p21-p11.2    | g4507264    | ossification                                           | hormone activity                                            | 0.01274316 | 2.729278281 UP |
| 212236_x_at | KRT17     | chr17q21.2       | Hs.2785.1   | epidermis development                                  | structural molecule activity                                | 0.00036246 | 2.723758429 UP |
| 203021_at   | SLPI      | chr20q12         | g4507064    | NA                                                     | endopeptidase inhibitor activity                            | 0.0008173  | 2.639304565 UP |
| 203571_s_at | C10orf116 | chr10q23.2       | g5802975    | NA                                                     | NA                                                          | 0.00481734 | 2.591242646 UP |
| 219127_at   | PRR15L    | chr17q21.32      | g13236560   | NA                                                     | NA                                                          | 0.01451494 | 2.590789773 UP |
| 205363_at   | BBOX1     | chr11p14.2       | g4502368    | carnitine biosynthetic process                         | iron ion binding                                            | 0.02731879 | 2.584098926 UP |
| 206632_s_at | APOBEC3B  | chr22q13.1-q13.2 | g4758159    | NA                                                     | RNA binding                                                 | 0.00943469 | 2.461235198 UP |
| 219476_at   | C1orf116  | chr1q32.1        | g13129133   | NA                                                     | receptor activity                                           | 0.04001345 | 2.451806207 UP |
| 213293_s_at | TRIM22    | chr11p15         | Hs.295978.0 | transcription                                          | sequence-specific DNA binding transcription factor activity | 0.00283426 | 2.408730537 UP |
| 209008_x_at | KRT8      | chr12q13         | g1673574    | cytoskeleton organization                              | structural molecule activity                                | 0.01397969 | 2.33324953 UP  |
| 201170_s_at | BHLHE40   | chr3p26          | g4503298    | transcription                                          | DNA binding                                                 | 0.02136551 | 2.330897501 UP |
| 209373_at   | MALL      | chr2q13          | g13112010   | cholesterol homeostasis                                | protein binding                                             | 0.0258844  | 2.309204349 UP |
| 221478_at   | BNIP3L    | chr8p21          | Hs.132955.0 | apoptosis                                              | protein binding                                             | 0.02538764 | 2.251205677 UP |
| 219534_x_at | CDKN1C    | chr11p15.5       | g4557440    | regulation of cyclin-dependent protein kinase activity | protein kinase inhibitor activity                           | 0.01972268 | 2.238519208 UP |
| 221269_s_at | SH3BGRL3  | chr1p36.11       | g13775197   | cell redox homeostasis                                 | electron carrier activity                                   | 0.00032034 | 2.228448046 UP |
| 201131_s_at | CDH1      | chr16q22.1       | g4757959    | trophoblast cell differentiation                       | calcium ion binding                                         | 0.00901205 | 2.221594298 UP |
| 202627_s_at | SERPINE1  | chr7q21.3-q22    | Hs.82085.0  | response to reactive oxygen species                    | protease binding                                            | 0.00273167 | 2.220696768 UP |
| 211695_x_at | MUC1      | chr1q21          | g13560650   | female pregnancy                                       | NA                                                          | 0.02475333 | 2.201556379 UP |
| 202022_at   | ALDOC     | chr17cen-q12     | g4885062    | response to hypoxia                                    | catalytic activity                                          | 0.00082912 | 2.193002115 UP |
| 202180_s_at | MVP       | chr16p11.2       | g9665254    | transport                                              | protein binding                                             | 0.00082723 | 2.186512072 UP |
| 209531_at   | GSTZ1     | chr14q24.3       | g12655190   | L-phenylalanine catabolic process                      | catalytic activity                                          | 0.00075855 | 2.181610844 UP |
| 221841_s_at | KLF4      | chr9q31          | Hs.7934.1   | transcription                                          | nucleic acid binding                                        | 0.04501805 | 2.171446129 UP |
| 202023_at   | EFNA1     | chr1q21-q22      | g4758245    | activation of MAPK activity                            | receptor binding                                            | 6.08E-05   | 2.138278509 UP |
| 213572_s_at | SERPINB1  | chr6p25          | Hs.183583.1 | NA                                                     | serine-type endopeptidase inhibitor activity                | 0.00564888 | 2.132535714 UP |
| 214370_at   | S100A8    | chr1q21          | Hs.100000.1 | chemotaxis                                             | calcium ion binding                                         | 0.00227372 | 2.11837819 UP  |

|             |            |                    |             |                                                |                                                 |            |             |    |
|-------------|------------|--------------------|-------------|------------------------------------------------|-------------------------------------------------|------------|-------------|----|
| 215223_s_at | SOD2       | chr6q25.3          | Hs.318885.2 | response to reactive oxygen species            | superoxide dismutase activity                   | 0.00092098 | 2.082114462 | UP |
| 213279_at   | DHRS1      | chr14q12           | Hs.308467.0 | metabolic process                              | catalytic activity                              | 0.00398662 | 2.050002422 | UP |
| 212268_at   | SERPINB1   | chr6p25            | Hs.183583.0 | NA                                             | serine-type endopeptidase inhibitor activity    | 0.00062214 | 2.016961573 | UP |
| 201720_s_at | LAPTM5     | chr1p34            | Hs.79356.0  | transport                                      | NA                                              | 0.01894611 | 2.013103847 | UP |
| 201721_s_at | LAPTM5     | chr1p34            | g5803055    | transport                                      | NA                                              | 0.01055726 | 2.009525022 | UP |
| 204858_s_at | TYMP       | chr22q13 22q13.33  | g7669488    | mitochondrial genome maintenance               | platelet-derived growth factor receptor binding | 0.0035755  | 2.007250418 | UP |
| 201849_at   | BNIP3      | chr10q26.3         | g7669480    | response to hypoxia                            | protein binding                                 | 0.00596117 | 1.996006092 | UP |
| 202998_s_at | LOXL2      | chr8p21.3          | g4505010    | protein modification process                   | scavenger receptor activity                     | 0.01487211 | 1.990895326 | UP |
| 215034_s_at | TM4SF1     | chr3q21-q25        | Hs.306643.0 | NA                                             | NA                                              | 0.02442372 | 1.988397059 | UP |
| 204542_at   | ST6GALNAC2 | chr17q25.1         | g5454091    | protein glycosylation                          | sialyltransferase activity                      | 0.00775359 | 1.987239402 | UP |
| 200696_s_at | GSN        | chr9q33            | g4504164    | apoptosis                                      | actin binding                                   | 0.00317581 | 1.985132443 | UP |
| 203108_at   | GPRC5A     | chr12p13-p12.3     | g12056470   | signal transduction                            | signal transducer activity                      | 0.03359752 | 1.984151694 | UP |
| 202912_at   | ADM        | chr11p15.4         | g4501944    | response to hypoxia                            | receptor binding                                | 0.00232102 | 1.983273616 | UP |
| 203964_at   | NMI        | chr2q23            | g4758813    | transcription from RNA polymerase II promoter  | nucleotide binding                              | 0.00363805 | 1.978107802 | UP |
| 215446_s_at | LOX        | chr5q23.2          | Hs.102267.3 | blood vessel development                       | protein-lysine 6-oxidase activity               | 0.03419449 | 1.975490897 | UP |
| 217272_s_at | SERPINB13  | chr18q21.3-q22     | Hs.241407.2 | response to UV                                 | serine-type endopeptidase inhibitor activity    | 0.01863352 | 1.962423008 | UP |
| 205819_at   | MARCO      | chr2q14.2          | g5803079    | cell surface receptor linked signaling pathway | receptor activity                               | 0.00388519 | 1.961501337 | UP |
| 204379_s_at | FGFR3      | chr4p16.3          | g13112046   | MAPKKK cascade                                 | nucleotide binding                              | 0.02866581 | 1.957601618 | UP |
| 201015_s_at | JUP        | chr17q21           | g12056467   | cell fate specification                        | transcription coactivator activity              | 0.02369083 | 1.951125164 | UP |
| 206884_s_at | SCEL       | chr13q22           | g4506798    | epidermis development                          | protein binding                                 | 0.03812138 | 1.934220709 | UP |
| 208791_at   | CLU        | chr8p21-p12        | g180619     | release of cytochrome c from mitochondria      | protein binding                                 | 0.00322229 | 1.93247815  | UP |
| 218531_at   | TMEM134    | chr11q13.2         | g13376700   | NA                                             | NA                                              | 0.00070528 | 1.918497996 | UP |
| 201328_at   | ETS2       | chr21q22.3 21q22.2 | Hs.85146.0  | skeletal system development                    | DNA binding                                     | 0.00142081 | 1.913084408 | UP |
| 212099_at   | RHOB       | chr2p24            | Hs.204354.0 | angiogenesis                                   | nucleotide binding                              | 0.00212143 | 1.908214069 | UP |
| 202688_at   | TNFSF10    | chr3q26            | g4507592    | apoptosis                                      | receptor binding                                | 0.02560326 | 1.906873195 | UP |
| 210845_s_at | PLAUR      | chr19q13           | g517197     | cellular component movement                    | receptor activity                               | 0.01293699 | 1.899344941 | UP |
| 203585_at   | ZNF185     | chrXq28            | g6005971    | NA                                             | zinc ion binding                                | 0.00403861 | 1.891484175 | UP |
| 221588_x_at | ALDH6A1    | chr14q24.3         | Hs.293970.1 | thymine catabolic process                      | acyl-CoA binding                                | 0.01978282 | 1.880898005 | UP |
| 202130_at   | RIOK3      | chr18q11.2         | Hs.209061.0 | protein phosphorylation                        | nucleotide binding                              | 0.00189021 | 1.879264162 | UP |
| 203227_s_at | TSPAN31    | chr12q13.3         | g5174666    | positive regulation of cell proliferation      | NA                                              | 0.00232443 | 1.870607826 | UP |

|             |                        |                         |             |                                                                          |                                              |            |                |
|-------------|------------------------|-------------------------|-------------|--------------------------------------------------------------------------|----------------------------------------------|------------|----------------|
| 221477_s_at | SOD2                   | chr6q25.3               | Hs.177781.0 | response to reactive oxygen species                                      | superoxide dismutase activity                | 0.00420038 | 1.858268176 UP |
| 214433_s_at | SELENBP1               | chr1q21.3               | Hs.288973.1 | transport                                                                | protein binding                              | 0.0273699  | 1.857625041 UP |
| 204470_at   | CXCL1                  | chr4q21                 | g4504152    | chemotaxis                                                               | receptor binding                             | 0.00842643 | 1.854813572 UP |
| 219888_at   | SPAG4                  | chr20q11.21             | g11037054   | spermatogenesis<br>cellular biogenic amine                               | structural molecule activity                 | 0.04278436 | 1.854016578 UP |
| 212741_at   | MAOA                   | chrXp11.3               | Hs.183109.1 | metabolic process                                                        | protein binding                              | 0.00553224 | 1.833733853 UP |
| 212647_at   | RRAS                   | chr19q13.3-qter         | Hs.9651.0   | signal transduction                                                      | nucleotide binding                           | 0.00199884 | 1.833654346 UP |
| 210785_s_at | C1orf38                | chr1p35.3               | g8272423    | inflammatory response                                                    | NA                                           | 0.01335391 | 1.8286004 UP   |
| 205126_at   | VRK2                   | chr2p16.1               | g5454163    | protein phosphorylation                                                  | nucleotide binding                           | 5.53E-05   | 1.813643086 UP |
| 206033_s_at | DSC3                   | chr18q12.1              | g13435367   | cell adhesion                                                            | calcium ion binding                          | 9.39E-05   | 1.803750503 UP |
| 33304_at    | ISG20                  | chr15q26                | 4866504     | DNA catabolic process,<br>exonucleolytic                                 | 3'-5'-exoribonuclease activity               | 0.03284559 | 1.794009741 UP |
| 205185_at   | SPINK5                 | chr5q32                 | g5803218    | epidermal cell differentiation                                           | serine-type endopeptidase inhibitor activity | 0.00765228 | 1.793741727 UP |
| 211368_s_at | CASP1                  | chr11q23                | g717045     | response to hypoxia                                                      | cysteine-type endopeptidase activity         | 0.00298563 | 1.787505553 UP |
| 202996_at   | POLD4                  | chr11q13                | g10863968   | positive regulation of endothelial cell proliferation                    | DNA-directed DNA polymerase activity         | 0.00872433 | 1.777665471 UP |
| 204290_s_at | ALDH6A1                | chr14q24.3              | g11095440   | thymine catabolic process                                                | acyl-CoA binding                             | 0.01265244 | 1.77377393 UP  |
| 214453_s_at | IFI44                  | chr1p31.1               | Hs.82316.2  | response to virus                                                        | NA                                           | 0.02176279 | 1.770740102 UP |
| 214093_s_at | FUBP1                  | chr1p31.1               | Hs.22370.0  | transcription                                                            | DNA binding                                  | 0.00188523 | 1.770016171 UP |
| 209894_at   | LEPR                   | chr1p31                 | g3236285    | angiogenesis                                                             | receptor activity                            | 0.01223844 | 1.768015275 UP |
| 209386_at   | TM4SF1                 | chr3q21-q25             | Hs.3337.0   | NA                                                                       | NA                                           | 0.03557034 | 1.766601556 UP |
| 211355_x_at | LEPR                   | chr1p31                 | g1279904    | angiogenesis                                                             | receptor activity                            | 0.03627748 | 1.759845495 UP |
| 213667_at   | SRCAP                  | chr16p11.2              | Hs.87908.1  | transcription                                                            | nucleotide binding                           | 0.01037139 | 1.757800834 UP |
| 209667_at   | CES2                   | chr16q22.1              | Hs.282975.0 | catabolic process                                                        | carboxylesterase activity                    | 0.00399657 | 1.748631295 UP |
| 203986_at   | FAM47E /// STBD1       | chr4q21.1               | g4503976    | carbohydrate metabolic process                                           | catalytic activity                           | 0.00107632 | 1.740952202 UP |
| 201310_s_at | C5orf13                | chr5q22.1               | g4758865    | regulation of transforming growth factor beta receptor signaling pathway | protein binding                              | 0.0019843  | 1.730375555 UP |
| 201236_s_at | BTG2                   | chr1q32                 | g5802987    | DNA repair                                                               | protein binding                              | 0.03463072 | 1.720945895 UP |
| 213698_at   | LOC100130633 /// ZMYM6 | chr1p34.2 /// chr1p34.3 | Hs.301637.1 | G-protein coupled receptor protein signaling pathway                     | nucleic acid binding                         | 0.02592778 | 1.717540259 UP |
| 204981_at   | SLC22A18               | chr11p15.5              | g4505526    | transport                                                                | drug transmembrane transporter activity      | 0.04060274 | 1.717339 UP    |
| 209463_s_at | TAF12                  | chr1p35.3               | g1345403    | transcription                                                            | DNA binding                                  | 0.00284485 | 1.714627326 UP |
| 201315_x_at | IFITM2                 | chr11p15.5              | g10835237   | immune response cellular component                                       | protein binding                              | 0.00049492 | 1.711731918 UP |
| 214866_at   | PLAUR                  | chr19q13                | Hs.179657.2 | movement                                                                 | receptor activity                            | 0.01144091 | 1.70515559 UP  |

|             |        |                    |             |                                                                                         |                                                                        |            |                |
|-------------|--------|--------------------|-------------|-----------------------------------------------------------------------------------------|------------------------------------------------------------------------|------------|----------------|
| 209034_at   | PNRC1  | chr6q15            | g12751123   | transcription                                                                           | protein binding                                                        | 0.03964706 | 1.704167216 UP |
| 209387_s_at | TM4SF1 | chr3q21-q25        | g186803     | NA                                                                                      | NA                                                                     | 0.0040358  | 1.699972689 UP |
| 202488_s_at | FXYD3  | chr19q13.12        | g11612675   | transport                                                                               | ion channel activity                                                   | 0.00116214 | 1.684519787 UP |
| 201848_s_at | BNIP3  | chr10q26.3         | g558845     | response to hypoxia                                                                     | protein binding<br>phospholipase inhibitor<br>activity                 | 0.02727737 | 1.683887256 UP |
| 201302_at   | ANXA4  | chr2p13            | g4809272    | anti-apoptosis<br>multicellular organismal<br>development                               | NA                                                                     | 0.00097351 | 1.682875727 UP |
| 201325_s_at | EMP1   | chr12p12.3         | g4503558    | multicellular organismal<br>development                                                 | NA                                                                     | 0.02306666 | 1.682290854 UP |
| 218010_x_at | PPDPF  | chr20q13.33        | g13236523   | development                                                                             | NA                                                                     | 0.04037737 | 1.682225542 UP |
| 202201_at   | BLVRB  | chr19q13.1-q13.2   | g4502418    | metabolic process                                                                       | catalytic activity<br>protein-methionine-R-oxide<br>reductase activity | 0.01503181 | 1.680194891 UP |
| 218773_s_at | MSRB2  | chr10p12           | g6912591    | protein repair                                                                          | hydrolase activity                                                     | 0.0163634  | 1.678223757 UP |
| 204034_at   | ETHE1  | chr19q13.31        | g7657686    | NA                                                                                      | NA<br>N4-(beta-N-<br>acetylglucosaminy)-L-<br>asparaginase activity    | 0.00533721 | 1.678179944 UP |
| 216064_s_at | AGA    | chr4q34.3          | Hs.207776.1 | protein deglycosylation                                                                 | metalloendopeptidase<br>activity                                       | 0.00673412 | 1.673411949 UP |
| 219909_at   | MMP28  | chr17q21.1         | g13236529   | proteolysis                                                                             | glutathione transferase<br>activity                                    | 9.58E-05   | 1.667152504 UP |
| 217751_at   | GSTK1  | chr7q35            | g7705703    | NA                                                                                      | activity                                                               | 0.01004675 | 1.665088757 UP |
| 201058_s_at | MYL9   | chr20q11.23        | g5174602    | muscle contraction                                                                      | motor activity                                                         | 0.03610724 | 1.664870187 UP |
| 201329_s_at | ETS2   | chr21q22.3 21q22.2 | g4885220    | skeletal system development                                                             | DNA binding<br>phospholipase inhibitor<br>activity                     | 0.02571267 | 1.664512593 UP |
| 201301_s_at | ANXA4  | chr2p13            | g12652858   | anti-apoptosis                                                                          | cysteine-type<br>endopeptidase activity                                | 0.00017488 | 1.661702752 UP |
| 211367_s_at | CASP1  | chr11q23           | g717043     | response to hypoxia<br>negative regulation of<br>cytokine-mediated signaling<br>pathway | phosphoprotein<br>phosphatase activity                                 | 0.00391486 | 1.660886248 UP |
| 200636_s_at | PTPRF  | chr1p34            | g4506310    | calcium-independent cell-cell<br>adhesion                                               | transmembrane receptor<br>activity                                     | 0.04572522 | 1.660729448 UP |
| 201428_at   | CLDN4  | chr7q11.23         | g4502876    | adhesion                                                                                | activity                                                               | 0.01167854 | 1.660154961 UP |
| 202411_at   | IFI27  | chr14q32           | g5031780    | apoptosis                                                                               | NA                                                                     | 0.0114501  | 1.654789176 UP |
| 219352_at   | HERC6  | chr4q22.1          | g8923589    | protein modification process                                                            | ligase activity                                                        | 0.01383166 | 1.65274675 UP  |
| 202936_s_at | SOX9   | chr17q23           | g4557852    | cartilage condensation                                                                  | DNA binding                                                            | 0.02363985 | 1.651717416 UP |
| 210732_s_at | LGALS8 | chr1q43            | g13249300   | NA                                                                                      | sugar binding                                                          | 0.00399367 | 1.649854651 UP |
| 210827_s_at | ELF3   | chr1q32.2          | g1841524    | transcription                                                                           | DNA binding                                                            | 0.01824815 | 1.649747098 UP |
| 206032_at   | DSC3   | chr18q12.1         | Hs.41690.0  | cell adhesion                                                                           | calcium ion binding                                                    | 0.00626878 | 1.649611357 UP |
| 202597_at   | IRF6   | chr1q32.3-q41      | Hs.11801.0  | transcription                                                                           | DNA binding                                                            | 0.03301679 | 1.644689078 UP |
| 206492_at   | FHIT   | chr3p14.2          | g4503718    | DNA replication                                                                         | catalytic activity                                                     | 0.01000708 | 1.642669846 UP |
| 200811_at   | CIRBP  | chr19p13.3         | g4502846    | response to stress                                                                      | nucleotide binding                                                     | 0.00373498 | 1.638389675 UP |

|             |          |                                      |             |                                                                |                                                                                        |            |             |    |
|-------------|----------|--------------------------------------|-------------|----------------------------------------------------------------|----------------------------------------------------------------------------------------|------------|-------------|----|
| 209398_at   | HIST1H1C | chr6p21.3                            | g12803628   | nucleosome assembly                                            | DNA binding                                                                            | 0.01097293 | 1.633844799 | UP |
| 202121_s_at | CHMP2A   | chr19q                               | g7656921    | transport<br>generation of precursor<br>metabolites and energy | protein binding                                                                        | 0.01163151 | 1.632583928 | UP |
| 207813_s_at | FDXR     | chr17q24-q25                         | g13435351   | response to oxidative stress                                   | catalytic activity                                                                     | 0.01691099 | 1.628894263 | UP |
| 219597_s_at | DUOX1    | chr15q15.3                           | g8393276    | NA                                                             | peroxidase activity                                                                    | 0.02349668 | 1.624914047 | UP |
| 221610_s_at | STAP2    | chr19p13.3                           | g12653994   | protein polyubiquitination                                     | protein binding                                                                        | 0.0014485  | 1.620985151 | UP |
| 203409_at   | DDB2     | chr11p12-p11                         | g4557514    | NA                                                             | DNA binding                                                                            | 0.00245757 | 1.619819052 | UP |
| 203153_at   | IFIT1    | chr10q23.31                          | g4504584    | apoptosis                                                      | binding                                                                                | 0.01558039 | 1.611321766 | UP |
| 221479_s_at | BNIP3L   | chr8p21<br>chr9q12-<br>q21.2 9q21.13 | g12001981   | lipid metabolic process                                        | protein binding<br>phospholipase inhibitor<br>activity                                 | 0.04998139 | 1.607905287 | UP |
| 201012_at   | ANXA1    |                                      | g4502100    | inflammatory response<br>cellular component                    | transmembrane receptor<br>protein tyrosine kinase<br>adaptor protein activity          | 0.00014435 | 1.606955375 | UP |
| 207655_s_at | BLNK     | chr10q23.2-q23.33                    | g7019534    | movement                                                       | protein binding                                                                        | 0.01339227 | 1.60652194  | UP |
| 201005_at   | CD9      | chr12p13.3                           | g4502692    | ganglioside metabolic process                                  | beta-N-<br>acetylhexosaminidase<br>activity                                            | 0.00323273 | 1.603135695 | UP |
| 215891_s_at | GM2A     | chr5q33.1                            | Hs.289082.1 | negative regulation of protein<br>ubiquitination               | protein binding                                                                        | 0.02348796 | 1.602593076 | UP |
| 212633_at   | KIAA0776 | chr6q16.1                            | Hs.5460.0   | visual perception                                              | catalytic activity                                                                     | 0.00502988 | 1.602397806 | UP |
| 204399_s_at | EML2     | chr19q13.32                          | Hs.24178.0  | regulation of cyclin-<br>dependent protein kinase<br>activity  | activity                                                                               | 0.00688755 | 1.602386087 | UP |
| 203725_at   | GADD45A  | chr1p31.2                            | g9790904    | liver development                                              | protein binding                                                                        | 0.00159724 | 1.600219916 | UP |
| 208190_s_at | LSR      | chr19q13.12                          | g7706247    | immune response                                                | receptor activity                                                                      | 0.01201514 | 1.596458396 | UP |
| 221291_at   | ULBP2    | chr6q25                              | g13376823   | oxidation reduction<br>cellular component                      | MHC class I receptor activity<br>peptide-methionine-(S)-S-<br>oxide reductase activity | 0.00112914 | 1.594410256 | UP |
| 217783_s_at | YPEL5    | chr2p23.1                            | g7706340    | movement                                                       | nucleotide binding                                                                     | 0.00131197 | 1.591880359 | UP |
| 216388_s_at | LTB4R    | chr14q11.2-q12                       | Hs.28408.2  | steroid biosynthetic process                                   | catalytic activity                                                                     | 0.00875907 | 1.590185073 | UP |
| 205829_at   | HSD17B1  | chr17q11-q21                         | g4504500    | positive regulation of cell<br>proliferation                   | NA                                                                                     | 0.0141431  | 1.588034435 | UP |
| 203226_s_at | TSPAN31  | chr12q13.3                           | Hs.50984.0  | NA                                                             | NA                                                                                     | 0.00323586 | 1.583676395 | UP |
| 209114_at   | TSPAN1   | chr1p34.1                            | g6434903    | glycerol metabolic process                                     | phosphoric diester<br>hydrolase activity                                               | 0.00145489 | 1.582693506 | UP |
| 219722_s_at | GDPD3    | chr16p11.2                           | g13236539   | angiogenesis                                                   | receptor activity                                                                      | 0.022046   | 1.578174851 | UP |
| 211356_x_at | LEPR     | chr1p31                              | g1519389    | metabolic process                                              | 3-keto sterol reductase<br>activity                                                    | 0.02676462 | 1.577995387 | UP |
| 205379_at   | CBR3     | chr21q22.2                           | g7108334    |                                                                |                                                                                        | 0.00763837 | 1.577535269 | UP |

|             |          |             |             |                                                                                        |                                      |            |                |
|-------------|----------|-------------|-------------|----------------------------------------------------------------------------------------|--------------------------------------|------------|----------------|
| 211911_x_at | HLA-B    | chr6p21.3   | g307236     | stimulatory C-type lectin<br>receptor signaling pathway<br>retrograde vesicle-mediated | protein binding                      | 0.00122334 | 1.577183895 UP |
| 202296_s_at | RER1     | chr1p36     | g5902045    | transport, Golgi to ER                                                                 | NA                                   | 0.02556422 | 1.57228587 UP  |
| 211668_s_at | PLAU     | chr10q24    | g340155     | angiogenesis                                                                           | catalytic activity                   | 0.01464054 | 1.572077779 UP |
| 219147_s_at | C9orf95  | chr9q21.13  | g8923529    | pyridine nucleotide<br>biosynthetic process                                            | nucleotide binding                   | 0.01451819 | 1.57149606 UP  |
| 213540_at   | HSD17B8  | chr6p21.3   | Hs.288354.0 | fatty acid biosynthetic<br>process                                                     | catalytic activity                   | 0.01342279 | 1.571358396 UP |
| 219104_at   | RNF141   | chr11p15.4  | g7706776    | regulation of transcription,<br>DNA-dependent                                          | DNA binding                          | 0.04705965 | 1.567289832 UP |
| 203882_at   | IRF9     | chr14q11.2  | g5174474    | protein polyubiquitination                                                             | DNA binding                          | 0.00430184 | 1.56407644 UP  |
| 212136_at   | ATP2B4   | chr1q32.1   | Hs.305923.2 | ATP biosynthetic process                                                               | nucleotide binding                   | 0.04202282 | 1.561000091 UP |
| 202525_at   | PRSS8    | chr16p11.2  | g4506152    | proteolysis                                                                            | catalytic activity                   | 0.04164104 | 1.560994442 UP |
| 204389_at   | MAOA     | chrXp11.3   | g4557734    | cellular biogenic amine<br>metabolic process                                           | protein binding                      | 0.00383477 | 1.559904465 UP |
| 202284_s_at | CDKN1A   | chr6p21.2   | g11386202   | regulation of cyclin-<br>dependent protein kinase<br>activity                          | protein kinase inhibitor<br>activity | 0.00153505 | 1.559495432 UP |
| 201009_s_at | TXNIP    | chr1q21.1   | Hs.179526.0 | negative regulation of<br>transcription from RNA<br>polymerase II promoter             | enzyme inhibitor activity            | 0.04400437 | 1.554307676 UP |
| 204971_at   | CSTA     | chr3q21     | g4885164    | negative regulation of<br>peptidase activity                                           | protease binding                     | 0.01662906 | 1.553774515 UP |
| 200904_at   | HLA-E    | chr6p21.3   | Hs.181392.0 | antigen processing and<br>presentation of peptide                                      | MHC class I receptor activity        | 0.02119863 | 1.552444405 UP |
| 208319_s_at | RBM3     | chrXp11.2   | g5803136    | antigen via MHC class I<br>RNA processing                                              | nucleotide binding                   | 0.01308874 | 1.552086439 UP |
| 213895_at   | EMP1     | chr12p12.3  | Hs.79368.1  | multicellular organismal<br>development                                                | NA                                   | 0.01320548 | 1.54983348 UP  |
| 202833_s_at | SERPINA1 | chr14q32.1  | g4505792    | response to hypoxia                                                                    | protease binding                     | 0.00043503 | 1.549217276 UP |
| 212203_x_at | IFITM3   | chr11p15.5  | Hs.182241.2 | immune response                                                                        | NA                                   | 0.01146802 | 1.54913539 UP  |
| 219655_at   | C7orf10  | chr7p14.1   | g13376041   | metabolic process                                                                      | catalytic activity                   | 0.00201291 | 1.547063016 UP |
| 204398_s_at | EML2     | chr19q13.32 | g6912355    | visual perception                                                                      | catalytic activity                   | 0.00441355 | 1.545760635 UP |
| 213010_at   | PRKCDBP  | chr11p15.4  | Hs.85181.1  | NA                                                                                     | protein kinase C binding             | 0.0108365  | 1.545509352 UP |
| 218844_at   | ACSF2    | chr17q21.33 | g13376740   | lipid metabolic process                                                                | nucleotide binding                   | 0.01788725 | 1.544790773 UP |
| 220052_s_at | TINF2    | chr14q12    | g6912715    | telomere maintenance                                                                   | DNA binding                          | 0.04115792 | 1.543689961 UP |
| 212659_s_at | IL1RN    | chr2q14.2   | Hs.81134.0  | chronic inflammatory<br>response to antigenic stimulus                                 | receptor activity                    | 0.04181312 | 1.540273395 UP |
| 218343_s_at | GTF3C3   | chr2q33.1   | g6912397    | transcription                                                                          | DNA binding                          | 0.03198409 | 1.538778856 UP |

|             |         |                  |             |                                                     |                                      |            |             |    |
|-------------|---------|------------------|-------------|-----------------------------------------------------|--------------------------------------|------------|-------------|----|
| 210020_x_at | CALML3  | chr10pter-p13    | g189080     | NA                                                  | calcium ion binding                  | 0.01100541 | 1.53830535  | UP |
| 204698_at   | ISG20   | chr15q26         | g6857799    | NA                                                  | 3'-5'-exoribonuclease                | 0.04707216 | 1.538302399 | UP |
| 217744_s_at | PERP    | chr6q24          | g11545842   | exonucleolytic                                      | activity                             | 0.01559941 | 1.537961251 | UP |
| 204480_s_at | C9orf16 | chr9q34.1        | g13129127   | apoptosis                                           | NA                                   | 0.00248682 | 1.537667734 | UP |
| 216591_s_at | SDHC    | chr1q23.3        | Hs.247725.0 | NA                                                  | succinate dehydrogenase              | 0.01616017 | 1.537001913 | UP |
| 202769_at   | CCNG2   | chr4q21.1        | Hs.79069.0  | tricarboxylic acid cycle                            | activity                             | 0.00013863 | 1.536610133 | UP |
| 200622_x_at | CALM3   | chr19q13.2-q13.3 | Hs.141011.0 | cell cycle checkpoint                               | NA                                   | 0.02853967 | 1.532707943 | UP |
| 209230_s_at | NUPR1   | chr16p11.2       | g5732669    | muscle contraction                                  | calcium ion binding                  | 0.01940904 | 1.52776046  | UP |
| 211924_s_at | PLAUR   | chr19q13         | g13641308   | induction of apoptosis                              | NA                                   | 0.01040002 | 1.524211674 | UP |
| 213509_x_at | CES2    | chr16q22.1       | Hs.282975.1 | cellular component                                  | receptor activity                    | 0.02196529 | 1.523804444 | UP |
| 33646_g_at  | GM2A    | chr5q33.1        | 4819721     | movement                                            | carboxylesterase activity            | 0.03715897 | 1.519247195 | UP |
| 204462_s_at | SLC16A2 | chrXq13.2        | g5730044    | catabolic process                                   | beta-N-acetylhexosaminidase          | 0.00991272 | 1.518841954 | UP |
| 205076_s_at | MTMR11  | chr1q12-q21      | g5870890    | ganglioside metabolic process                       | activity                             | 0.00888834 | 1.514652449 | UP |
| 203828_s_at | IL32    | chr16p13.3       | g4758811    | transport                                           | transporter activity                 | 0.01807272 | 1.51440081  | UP |
| 41047_at    | C9orf16 | chr9q34.1        | 4860579_RC  | dephosphorylation                                   | phosphatase activity                 | 0.00139715 | 1.514152877 | UP |
| 200710_at   | ACADVL  | chr17p13.1       | g4557234    | defense response                                    | cytokine activity                    | 0.00016262 | 1.514069694 | UP |
| 211559_s_at | CCNG2   | chr4q21.1        | g1236234    | NA                                                  | acyl-CoA dehydrogenase               | 0.04232358 | 1.513912394 | UP |
| 202447_at   | DECR1   | chr8q21.3        | g4503300    | temperature homeostasis                             | activity                             | 0.00821675 | 1.513774773 | UP |
| 202644_s_at | TNFAIP3 | chr6q23          | g5454131    | cell cycle checkpoint                               | NA                                   | 0.01064754 | 1.513489848 | UP |
| 216841_s_at | SOD2    | chr6q25.3        | Hs.318885.1 | fatty acid beta-oxidation                           | catalytic activity                   | 0.01925615 | 1.513301662 | UP |
| 202772_at   | HMGCL   | chr1p36.1-p35    | g4504426    | apoptosis                                           | DNA binding                          | 0.01628472 | 1.512898444 | UP |
| 209025_s_at | SYNCRIP | chr6q14-q15      | g3037012    | response to reactive oxygen species                 | superoxide dismutase activity        | 0.03651403 | 1.510477775 | UP |
| 218376_s_at | MICAL1  | chr6q21          | g12232438   | nucleobase, nucleoside, nucleotide and nucleic acid | acyl-CoA binding                     | 0.01084483 | 1.510206035 | UP |
| 209970_x_at | CASP1   | chr11q23         | g435598     | metabolic process                                   | acyl-CoA binding                     | 0.0017896  | 1.510086987 | UP |
| 208729_x_at | HLA-B   | chr6p21.3        | g1871135    | RNA processing                                      | nucleotide binding                   | 0.00026082 | 1.509576518 | UP |
| 202122_s_at | PLIN3   | chr19p13.3       | g5032182    | cytoskeleton organization                           | nucleotide binding                   | 0.02077263 | 1.508919907 | UP |
| 212841_s_at | PPFIBP2 | chr11p15.4       | Hs.12953.0  | response to hypoxia                                 | monooxygenase activity               | 0.01504713 | 1.508587366 | UP |
| 200810_s_at | CIRBP   | chr19p13.3       | g4502846    | stimulatory C-type lectin                           | cysteine-type endopeptidase activity | 0.00856382 | 1.507267569 | UP |
| 201850_at   | CAPG    | chr2p11.2        | g4502560    | receptor signaling pathway                          | protein binding                      | 0.00836841 | 1.50675503  | UP |
| 215184_at   | DAPK2   | chr15q22.31      | Hs.266662.0 | transport                                           | protein binding                      | 0.04158848 | 1.505919365 | UP |
|             |         |                  |             | cell communication                                  | DNA binding                          |            |             |    |
|             |         |                  |             | response to stress                                  | nucleotide binding                   |            |             |    |
|             |         |                  |             | protein complex assembly                            | actin binding                        |            |             |    |
|             |         |                  |             | protein phosphorylation                             | nucleotide binding                   |            |             |    |



|             |         |              |             |                                                                                                 |                                                                |            |                |
|-------------|---------|--------------|-------------|-------------------------------------------------------------------------------------------------|----------------------------------------------------------------|------------|----------------|
| 216894_x_at | CDKN1C  | chr11p15.5   | Hs.106070.3 | regulation of cyclin-dependent protein kinase activity                                          | protein kinase inhibitor activity                              | 0.04572052 | 1.50429537 UP  |
| 218992_at   | C9orf46 | chr9p24.1    | g8923931    | NA                                                                                              | NA                                                             | 0.01267102 | 1.501585164 UP |
| 203594_at   | RTCD1   | chr1p21.2    | g4506588    | RNA processing                                                                                  | nucleotide binding                                             | 0.02964833 | 1.500417632 UP |
| 201109_s_at | THBS1   | chr15q15     | Hs.87409.0  | activation of MAPK activity                                                                     | phosphatidylserine binding                                     | 0.04487543 | 3.055059648 DN |
| 209101_at   | CTGF    | chr6q23.1    | g180923     | cartilage condensation<br>carbohydrate metabolic process                                        | fibronectin binding                                            | 0.00183674 | 3.005257713 DN |
| 201272_at   | AKR1B1  | chr7q35      | g4502048    | process                                                                                         | aldehyde reductase activity                                    | 0.00034077 | 2.86573879 DN  |
| 222108_at   | AMIGO2  | chr12q13.11  | Hs.121520.0 | anti-apoptosis                                                                                  | protein binding<br>sodium:potassium-exchanging ATPase activity | 0.04638288 | 2.692082023 DN |
| 201242_s_at | ATP1B1  | chr1q24      | g12652534   | response to hypoxia                                                                             | transporter activity                                           | 0.02334219 | 2.654414839 DN |
| 219911_s_at | SLCO4A1 | chr20q13.33  | g7706516    | transport                                                                                       | transporter activity                                           | 0.0047013  | 2.653750333 DN |
| 205282_at   | LRP8    | chr1p34      | g4758687    | proteolysis                                                                                     | receptor activity                                              | 0.01335067 | 2.624476979 DN |
| 203946_s_at | ARG2    | chr14q24.1   | g1763757    | urea cycle                                                                                      | arginase activity                                              | 0.0015405  | 2.470943839 DN |
| 209699_x_at | AKR1C2  | chr10p15-p14 | g531159     | lipid metabolic process<br>negative regulation of transcription from RNA polymerase II promoter | oxidoreductase activity                                        | 0.01454117 | 2.451292711 DN |
| 208937_s_at | ID1     | chr20q11     | g464181     | polymerase II promoter                                                                          | protein binding                                                | 0.01558983 | 2.411252167 DN |
| 203159_at   | GLS     | chr2q32-q34  | g7662327    | glutamine metabolic process<br>protein import into nucleus,                                     | glutaminase activity                                           | 0.0023157  | 2.346602725 DN |
| 210793_s_at | NUP98   | chr11p15.5   | g1184172    | docking                                                                                         | transporter activity                                           | 0.00101589 | 2.341428991 DN |
| 204151_x_at | AKR1C1  | chr10p15-p14 | g5453542    | lipid metabolic process                                                                         | aldo-keto reductase activity                                   | 0.00281728 | 2.330425653 DN |
| 202760_s_at | AKAP2   | chr9q31.3    | g6005708    | regulation of cell shape                                                                        | protein binding                                                | 0.03131807 | 2.258365358 DN |
| 208433_s_at | LRP8    | chr1p34      | g8923799    | proteolysis                                                                                     | receptor activity                                              | 0.00157043 | 2.233425871 DN |
| 216594_x_at | AKR1C1  | chr10p15-p14 | Hs.306098.1 | lipid metabolic process                                                                         | aldo-keto reductase activity                                   | 0.00055356 | 2.171840536 DN |
| 203158_s_at | GLS     | chr2q32-q34  | g6002672    | glutamine metabolic process                                                                     | glutaminase activity                                           | 0.03023614 | 2.143257797 DN |
| 211653_x_at | AKR1C2  | chr10p15-p14 | g187444     | lipid metabolic process                                                                         | oxidoreductase activity                                        | 0.00235818 | 2.142822561 DN |
| 203499_at   | EPHA2   | chr1p36      | g4758277    | skeletal system development                                                                     | nucleotide binding<br>epidermal growth factor receptor binding | 0.00063794 | 2.138642752 DN |
| 205767_at   | EREG    | chr4q13.3    | g4557566    | angiogenesis<br>G1/S transition of mitotic cell cycle                                           | receptor binding                                               | 0.0235911  | 2.115811672 DN |
| 208712_at   | CCND1   | chr11q13     | g179364     | cycle                                                                                           | protein kinase activity<br>ubiquitin-protein ligase activity   | 0.01310809 | 2.071947443 DN |
| 218585_s_at | DTL     | chr1q32      | g7705575    | protein polyubiquitination                                                                      | activity                                                       | 0.00369329 | 2.046226265 DN |
| 202580_x_at | FOXM1   | chr12p13     | g11386144   | regulation of cell growth                                                                       | DNA binding                                                    | 0.00095087 | 2.035325247 DN |
| 204768_s_at | FEN1    | chr11q12     | g6325465    | DNA replication                                                                                 | magnesium ion binding<br>insulin-like growth factor binding    | 0.00706734 | 2.000566213 DN |
| 210764_s_at | CYR61   | chr1p22.3    | g6649848    | regulation of cell growth                                                                       | binding                                                        | 0.04168295 | 1.994223911 DN |

|             |         |                  |             |                                               |                                          |            |                |
|-------------|---------|------------------|-------------|-----------------------------------------------|------------------------------------------|------------|----------------|
| 219017_at   | ETNK1   | chr12p12.1       | g10092614   | phosphatidylethanolamine biosynthetic process | nucleotide binding                       | 0.01968943 | 1.987789756 DN |
| 201502_s_at | NFKBIA  | chr14q13         | Hs.81328.0  | protein import into nucleus, translocation    | protein binding<br>cysteine-type         | 0.00610364 | 1.969263788 DN |
| 210017_at   | MALT1   | chr18q21         | Hs.180566.2 | B-1 B cell differentiation                    | endopeptidase activity                   | 0.00647218 | 1.965122896 DN |
| 205968_at   | KCNS3   | chr2p24          | g4504862    | transport                                     | ion channel activity                     | 0.00723304 | 1.945615726 DN |
| 219836_at   | ZBED2   | chr3q13.2        | g13375643   | NA                                            | DNA binding                              | 0.00972985 | 1.94249045 DN  |
| 210053_at   | TAF5    | chr10q24-q25.2   | Hs.96103.0  | transcription                                 | DNA binding                              | 0.01071407 | 1.940643184 DN |
| 212464_s_at | FN1     | chr2q34          | Hs.287820.1 | angiogenesis                                  | protease binding                         | 0.00818567 | 1.936590972 DN |
| 219221_at   | ZBTB38  | chr3q23          | g13376033   | transcription                                 | nucleic acid binding                     | 0.03883131 | 1.915040469 DN |
| 205899_at   | CCNA1   | chr13q12.3-q13   | g4502610    | cell cycle                                    | protein binding                          | 0.0152456  | 1.900695606 DN |
| 204818_at   | HSD17B2 | chr16q24.1-q24.2 | g4504502    | steroid biosynthetic process                  | catalytic activity                       | 0.01906486 | 1.891042152 DN |
| 204962_s_at | CENPA   | chr2p24-p21      | g4585861    | establishment of mitotic spindle orientation  | DNA binding                              | 0.00742626 | 1.88682344 DN  |
| 204604_at   | CDK14   | chr7q21-q22      | g6912583    | G2/M transition of mitotic cell cycle         | nucleotide binding                       | 0.01244238 | 1.850826837 DN |
| 203967_at   | CDC6    | chr17q21.3       | g1684902    | DNA replication checkpoint                    | nucleotide binding                       | 0.00699281 | 1.845476878 DN |
| 220333_at   | PAQR5   | chr15q23         | g8923182    | multicellular organismal development          | receptor activity                        | 0.04780843 | 1.841488207 DN |
| 216442_x_at | FN1     | chr2q34          | Hs.287820.2 | angiogenesis                                  | protease binding<br>extracellular matrix | 0.00348564 | 1.84060145 DN  |
| 211964_at   | COL4A2  | chr13q34         | Hs.75617.0  | angiogenesis                                  | structural constituent                   | 0.01712455 | 1.825848144 DN |
| 204244_s_at | DBF4    | chr7q21.3        | g5729733    | G1/S transition of mitotic cell cycle         | nucleic acid binding                     | 0.01677739 | 1.814304243 DN |
| 220651_s_at | MCM10   | chr10p13         | g8924142    | DNA replication                               | protein binding                          | 0.0062812  | 1.813324355 DN |
| 201540_at   | FHL1    | chrXq26          | g4503720    | multicellular organismal development          | protein binding                          | 0.00468205 | 1.805960382 DN |
| 209946_at   | VEGFC   | chr4q34.3        | g1373426    | angiogenesis                                  | growth factor activity                   | 0.00521356 | 1.800592621 DN |
| 203968_s_at | CDC6    | chr17q21.3       | g4502702    | DNA replication checkpoint                    | nucleotide binding                       | 0.00390767 | 1.798528565 DN |
| 220234_at   | CA8     | chr8q11-q12      | g5148943    | one-carbon metabolic process                  | carbonate dehydratase activity           | 0.01177842 | 1.789713818 DN |
| 211538_s_at | HSPA2   | chr14q24.1       | g4204879    | response to stress                            | nucleotide binding                       | 0.0004283  | 1.785104529 DN |
| 221489_s_at | SPRY4   | chr5q31.3        | Hs.285814.0 | multicellular organismal development          | protein binding<br>neurotransmitter      | 0.01254919 | 1.77350693 DN  |
| 206376_at   | SLC6A15 | chr12q21.3       | g8922349    | transport                                     | transporter activity                     | 0.00980224 | 1.768732489 DN |
| 212944_at   | SLC5A3  | chr21q22.12      | Hs.268016.0 | inositol metabolic process                    | transporter activity                     | 0.01801191 | 1.762610501 DN |
| 202207_at   | ARL4C   | chr2q37.1        | Hs.111554.0 | transport                                     | nucleotide binding                       | 0.03307652 | 1.760910203 DN |
| 210495_x_at | FN1     | chr2q34          | g11493493   | angiogenesis                                  | protease binding                         | 0.02305029 | 1.755353625 DN |
| 201984_s_at | EGFR    | chr7p12          | g4885198    | activation of MAPKK activity                  | nucleotide binding                       | 0.00054808 | 1.75404941 DN  |

|             |          |                       |             |                                                             |                                                             |            |                |
|-------------|----------|-----------------------|-------------|-------------------------------------------------------------|-------------------------------------------------------------|------------|----------------|
| 202800_at   | SLC1A3   | chr5p13               | g4759125    | neurotransmitter uptake                                     | L-glutamate transmembrane transporter activity              | 0.01062962 | 1.751150389 DN |
| 202491_s_at | IKBKAP   | chr9q31               | g4504628    | transcription                                               | DNA binding                                                 | 0.00353782 | 1.750429109 DN |
| 217427_s_at | HIRA     | chr22q11.2 22q11.21   | Hs.172350.1 | transcription                                               | chromatin binding                                           | 0.03689576 | 1.748241226 DN |
| 202241_at   | TRIB1    | chr8q24.13            | g13399327   | protein phosphorylation                                     | protein kinase activity                                     | 0.04275139 | 1.748186074 DN |
| 204767_s_at | FEN1     | chr11q12              | g12653112   | DNA replication                                             | magnesium ion binding                                       | 0.0194221  | 1.7474038 DN   |
| 212771_at   | FAM171A1 | chr10p13              | Hs.66762.0  | NA                                                          | NA                                                          | 0.00203726 | 1.743623966 DN |
| 204318_s_at | GTSE1    | chr22q13.2-q13.3      | g7705291    | G2 phase of mitotic cell cycle regulation of transcription, | NA                                                          | 0.00884162 | 1.742865801 DN |
| 203349_s_at | ETV5     | chr3q28               | g4758315    | DNA-dependent                                               | DNA binding                                                 | 0.00064665 | 1.742852237 DN |
| 211719_x_at | FN1      | chr2q34               | g13543399   | angiogenesis                                                | protease binding                                            | 0.01074906 | 1.738687213 DN |
| 205284_at   | URB2     | chr1q42.13            | g7661931    | NA                                                          | NA                                                          | 0.00571112 | 1.73854842 DN  |
| 212825_at   | PAXIP1   | chr7q36               | Hs.173854.0 | response to DNA damage stimulus                             | protein binding                                             | 0.01440567 | 1.72988327 DN  |
| 210119_at   | KCNJ15   | chr21q22.2            | g1765984    | transport                                                   | ion channel activity                                        | 0.01156063 | 1.72678716 DN  |
| 203139_at   | DAPK1    | chr9q34.1             | g4826683    | protein phosphorylation                                     | nucleotide binding                                          | 0.01038931 | 1.724056644 DN |
| 217678_at   | SLC7A11  | chr4q28-q32           | Hs.284235.0 | transport                                                   | amino acid transmembrane transporter activity               | 0.0152401  | 1.710319608 DN |
| 204275_at   | SOLH     | chr16p13.3            | Hs.55836.0  | proteolysis                                                 | sequence-specific DNA binding transcription factor activity | 0.01110999 | 1.707483159 DN |
| 212660_at   | PHF15    | chr5q31.1             | Hs.9729.1   | histone H3 acetylation                                      | protein binding                                             | 0.00108085 | 1.703964241 DN |
| 205055_at   | ITGAE    | chr17p13              | g6007850    | cell adhesion                                               | receptor activity                                           | 0.03106771 | 1.702444673 DN |
| 212875_s_at | C2CD2    | chr21q22.3            | Hs.16007.0  | NA                                                          | NA                                                          | 0.00328167 | 1.697665605 DN |
| 201983_s_at | EGFR     | chr7p12               | Hs.77432.0  | activation of MAPKK activity                                | nucleotide binding                                          | 0.01469844 | 1.689595544 DN |
| 201818_at   | LPCAT1   | chr5p15.33            | g13376233   | metabolic process                                           | calcium ion binding                                         | 0.00178102 | 1.687709482 DN |
| 203157_s_at | GLS      | chr2q32-q34           | g4240164    | glutamine metabolic process                                 | glutaminase activity                                        | 0.01733208 | 1.686431216 DN |
| 202084_s_at | SEC14L1  | chr17q25.2            | g4506866    | NA                                                          | binding                                                     | 0.02623595 | 1.686205581 DN |
| 214594_x_at | ATP8B1   | chr18q21-q22 18q21.31 | Hs.166196.0 | ATP biosynthetic process                                    | nucleotide binding                                          | 0.01117576 | 1.682117717 DN |
| 206508_at   | CD70     | chr19p13              | g4507604    | induction of apoptosis                                      | receptor binding                                            | 0.03987988 | 1.681071687 DN |
| 209464_at   | AURKB    | chr17p13.1            | g5688865    | cytokinesis                                                 | nucleotide binding                                          | 0.0036425  | 1.678393842 DN |
| 212665_at   | TIPARP   | chr3q25.31            | Hs.12813.0  | vasculogenesis                                              | nucleic acid binding                                        | 0.00090365 | 1.674752879 DN |
| 55081_at    | MICALL1  | chr22q13.1            | 4876617_RC  | NA                                                          | zinc ion binding                                            | 0.00600872 | 1.672289858 DN |
| 214771_x_at | MPRIIP   | chr17p11.2            | Hs.84883.2  | NA                                                          | actin binding                                               | 0.00109145 | 1.668312772 DN |
| 218627_at   | DRAM1    | chr12q23.2            | g8922957    | autophagy                                                   | NA                                                          | 0.00250246 | 1.667401568 DN |
| 219286_s_at | RBM15    | chr1p13               | g12232444   | patterning of blood vessels                                 | nucleotide binding                                          | 0.01381663 | 1.664247327 DN |
| 212693_at   | MDN1     | chr6q15               | Hs.76730.0  | protein complex assembly                                    | nucleotide binding                                          | 0.00339092 | 1.662500125 DN |

|             |          |                  |             |                                                                     |                                                  |            |             |    |
|-------------|----------|------------------|-------------|---------------------------------------------------------------------|--------------------------------------------------|------------|-------------|----|
| 202613_at   | CTPS     | chr1p34.1        | g4503132    | nucleobase, nucleoside,<br>nucleotide and nucleic acid              |                                                  |            |             |    |
| 218875_s_at | FBXO5    | chr6q25.2        | g6912365    | metabolic process                                                   | nucleotide binding                               | 0.00732775 | 1.658203375 | DN |
| 213449_at   | POP1     | chr8q22.1        | Hs.170114.0 | mitotic metaphase                                                   | protein binding                                  | 0.04677225 | 1.642841881 | DN |
|             |          |                  |             | tRNA 5'-leader removal                                              | ribonuclease MRP activity                        | 0.01488169 | 1.64060399  | DN |
|             |          |                  |             | transforming growth factor<br>beta receptor signaling<br>pathway    | frizzled binding                                 | 0.0437011  | 1.639477981 | DN |
| 203304_at   | BAMBI    | chr10p12.3-p11.2 | g6912533    |                                                                     | protein binding                                  | 0.011968   | 1.639201735 | DN |
| 209288_s_at | CDC42EP3 | chr2p21          | g6807668    | signal transduction                                                 | cysteine-type                                    |            |             |    |
|             |          |                  |             | DNA repair                                                          | endopeptidase activity                           | 0.02979949 | 1.638911615 | DN |
|             |          |                  |             |                                                                     | inositol or<br>phosphatidylinositol              |            |             |    |
| 203211_s_at | MTMR2    | chr11q22         | Hs.181326.0 | protein dephosphorylation                                           | phosphatase activity                             | 0.03633378 | 1.634465245 | DN |
|             |          |                  |             |                                                                     | cysteine-type                                    |            |             |    |
| 210018_x_at | MALT1    | chr18q21         | g5706377    | B-1 B cell differentiation                                          | endopeptidase activity                           | 0.01956775 | 1.633678818 | DN |
| 212552_at   | HPCAL1   | chr2p25.1        | Hs.3618.1   | NA                                                                  | calcium ion binding                              | 0.00149939 | 1.632928503 | DN |
| 202082_s_at | SEC14L1  | chr17q25.2       | Hs.75232.0  | NA                                                                  | binding                                          | 0.00601004 | 1.631703991 | DN |
|             |          |                  |             | polyamine biosynthetic<br>process                                   | adenosylmethionine<br>decarboxylase activity     | 0.03878348 | 1.62972423  | DN |
| 201196_s_at | AMD1     | chr6q21          | g178517     |                                                                     | sodium:potassium-<br>exchanging ATPase activity  | 0.01589316 | 1.629194736 | DN |
| 201243_s_at | ATP1B1   | chr1q24          | g4502276    | response to hypoxia                                                 | DNA binding                                      | 0.00418468 | 1.628878137 | DN |
| 200878_at   | EPAS1    | chr2p21-p16      | Hs.8136.0   | angiogenesis                                                        | nucleotide binding                               | 0.00402995 | 1.623015357 | DN |
| 207746_at   | POLQ     | chr3q13.33       | g7662545    | DNA replication                                                     |                                                  |            |             |    |
|             |          |                  |             | microtubule-based<br>movement                                       | nucleotide binding                               | 0.00083551 | 1.622172473 | DN |
| 219306_at   | KIF15    | chr3p21.31       | g9910265    | negative regulation of<br>transcription from RNA                    |                                                  |            |             |    |
|             |          |                  |             | polymerase II promoter<br>DNA synthesis involved in                 | DNA binding                                      | 0.02322196 | 1.620510165 | DN |
| 201697_s_at | DNMT1    | chr19p13.2       | g4503350    | DNA repair                                                          |                                                  |            |             |    |
| 204127_at   | RFC3     | chr13q13.2       | g12803002   |                                                                     | nucleotide binding                               | 0.03080918 | 1.618758954 | DN |
|             |          |                  |             |                                                                     | amino acid transmembrane<br>transporter activity | 0.04820972 | 1.613046984 | DN |
| 218041_x_at | SLC38A2  | chr12q           | g8924006    | transport                                                           | sodium:potassium-<br>exchanging ATPase activity  | 0.00683377 | 1.609172837 | DN |
| 208836_at   | ATP1B3   | chr3q23          | g1522634    | ATP biosynthetic process<br>epithelial to mesenchymal<br>transition | calcium ion binding                              | 0.01893948 | 1.608302997 | DN |
| 203186_s_at | S100A4   | chr1q21          | g9845514    |                                                                     | receptor activity                                | 0.01015962 | 1.608105485 | DN |
| 212722_s_at | JMJD6    | chr17q25         | Hs.72660.0  | blood vessel development                                            | nucleic acid binding                             | 0.0164354  | 1.598437895 | DN |
| 218866_s_at | POLR3K   | chr16p13.3       | g7706498    | transcription                                                       |                                                  |            |             |    |
|             |          |                  |             | multicellular organismal<br>development                             | protein binding                                  | 0.04597444 | 1.598057204 | DN |
| 201539_s_at | FHL1     | chrXq26          | g2078479    |                                                                     |                                                  |            |             |    |

|             |         |                |             |                                                                             |                                                             |            |                |
|-------------|---------|----------------|-------------|-----------------------------------------------------------------------------|-------------------------------------------------------------|------------|----------------|
| 213043_s_at | MED24   | chr17q21.1     | Hs.23106.1  | transcription<br>methionine metabolic<br>process                            | transcription cofactor<br>activity                          | 0.03375559 | 1.596388594 DN |
| 203200_s_at | MTRR    | chr5p15.31     | g13325067   | process                                                                     | iron ion binding                                            | 0.00168553 | 1.593984036 DN |
| 213682_at   | NUP50   | chr22q13.31    | Hs.169329.0 | transport                                                                   | protein binding                                             | 0.00396389 | 1.58933165 DN  |
| 212092_at   | PEG10   | chr7q21        | Hs.137476.0 | apoptosis                                                                   | nucleic acid binding                                        | 0.0208295  | 1.58690693 DN  |
| 202214_s_at | CUL4B   | chrXq23        | g13270466   | DNA repair<br>regulation of cyclin-<br>dependent protein kinase<br>activity | protein binding                                             | 0.01338092 | 1.585777055 DN |
| 204695_at   | CDC25A  | chr3p21        | Hs.1634.0   | in utero embryonic<br>development                                           | phosphoprotein<br>phosphatase activity                      | 0.04609403 | 1.584641689 DN |
| 201611_s_at | ICMT    | chr1p36.21     | g6912429    | development                                                                 | protein C-terminal carboxyl<br>O-methyltransferase activity | 0.01354474 | 1.581767144 DN |
| 205462_s_at | HPCAL1  | chr2p25.1      | g4504474    | NA                                                                          | calcium ion binding                                         | 0.00134592 | 1.580945654 DN |
| 208309_s_at | MALT1   | chr18q21       | g5803077    | B-1 B cell differentiation<br>purine base metabolic<br>process              | endopeptidase activity                                      | 0.04475511 | 1.579756114 DN |
| 212360_at   | AMPD2   | chr1p13.3      | Hs.82927.0  | microtubule-based<br>movement                                               | AMP deaminase activity                                      | 0.00260764 | 1.577889046 DN |
| 206364_at   | KIF14   | chr1q32.1      | g7661877    | polyamine biosynthetic<br>process                                           | nucleotide binding                                          | 0.0288507  | 1.57769335 DN  |
| 201197_at   | AMD1    | chr6q21        | g5209326    | N-terminal protein amino<br>acid acetylation                                | adenosylmethionine<br>decarboxylase activity                | 0.00113626 | 1.576811492 DN |
| 219378_at   | NAA16   | chr13q14.11    | g13375728   | NA                                                                          | receptor activity                                           | 0.02733814 | 1.576487865 DN |
| 200755_s_at | CALU    | chr7q32.1      | Hs.7753.0   | blood vessel development                                                    | calcium ion binding                                         | 0.02103965 | 1.576193203 DN |
| 212723_at   | JMJD6   | chr17q25       | Hs.72660.0  | early endosome to late<br>endosome transport                                | receptor activity                                           | 0.02223644 | 1.575898284 DN |
| 221522_at   | ANKRD27 | chr19q13.11    | g12053080   | interspecies interaction<br>between organisms                               | guanyl-nucleotide exchange<br>factor activity               | 0.01521704 | 1.575015991 DN |
| 203119_at   | CCDC86  | chr11q12.2     | g13129103   | release of cytochrome c from<br>mitochondria                                | NA                                                          | 0.00880913 | 1.574546756 DN |
| 204493_at   | BID     | chr22q11.1     | g4557360    | transport                                                                   | death receptor binding                                      | 0.0220343  | 1.574021872 DN |
| 202111_at   | SLC4A2  | chr7q35-q36    | g4507022    | NA                                                                          | transporter activity                                        | 0.00675683 | 1.570496948 DN |
| 212197_x_at | MPRIP   | chr17p11.2     | Hs.84883.0  | NA                                                                          | actin binding                                               | 0.02646358 | 1.568964715 DN |
| 202412_s_at | USP1    | chr1p31.3      | Hs.35086.0  | DNA repair                                                                  | cysteine-type<br>endopeptidase activity                     | 0.01714399 | 1.568103084 DN |
| 203276_at   | LMNB1   | chr5q23.2      | g5031876    | NA                                                                          | structural molecule activity                                | 0.00580873 | 1.565420282 DN |
| 204254_s_at | VDR     | chr12q13.11    | g4507882    | skeletal system development                                                 | DNA binding                                                 | 0.00239394 | 1.563968019 DN |
| 218016_s_at | POLR3E  | chr16p12.2     | g8922476    | transcription                                                               | DNA-directed RNA<br>polymerase activity                     | 0.00413535 | 1.561785104 DN |
| 209053_s_at | WHSC1   | chr4p16.3      | Hs.110457.3 | transcription                                                               | DNA binding                                                 | 0.0105477  | 1.561315996 DN |
| 202521_at   | CTCF    | chr16q21-q22.3 | g5729789    | DNA methylation                                                             | nucleic acid binding                                        | 0.00428119 | 1.555559705 DN |

|             |          |                 |             |                                                        |                                                 |            |             |    |
|-------------|----------|-----------------|-------------|--------------------------------------------------------|-------------------------------------------------|------------|-------------|----|
| 201041_s_at | DUSP1    | chr5q34         | g7108342    | protein dephosphorylation<br>transcription from RNA    | phosphoprotein<br>phosphatase activity          | 0.00208103 | 1.553922733 | DN |
| 203250_at   | RBM16    | chr6q25.1-q25.3 | g7662491    | polymerase II promoter                                 | nucleotide binding                              | 0.01647229 | 1.553601517 | DN |
| 212094_at   | PEG10    | chr7q21         | Hs.137476.0 | apoptosis                                              | nucleic acid binding                            | 0.01445561 | 1.553598353 | DN |
| 209226_s_at | TNPO1    | chr5q13.2       | g1657775    | protein import into nucleus,<br>translocation          | binding                                         | 0.01544034 | 1.548556565 | DN |
| 209225_x_at | TNPO1    | chr5q13.2       | Hs.168075.1 | protein import into nucleus,<br>translocation          | binding                                         | 0.00298615 | 1.547673599 | DN |
| 210220_at   | FZD2     | chr17q21.1      | g736678     | signal transduction                                    | signal transducer activity                      | 0.00097152 | 1.545433509 | DN |
| 210640_s_at | GPER     | chr7p22.3       | g2656120    | signal transduction                                    | signal transducer activity                      | 0.00753052 | 1.544888835 | DN |
| 201368_at   | ZFP36L2  | chr2p22.3-p21   | Hs.78909.0  | cell proliferation                                     | nucleic acid binding                            | 0.02929772 | 1.542594189 | DN |
| 204066_s_at | AGAP1    | chr2q37         | g7662483    | transport                                              | nucleotide binding                              | 0.02429195 | 1.539467106 | DN |
| 205677_s_at | DLEU1    | chr13q14.3      | g5031858    | NA                                                     | protein binding                                 | 0.03790138 | 1.538742644 | DN |
| 202715_at   | CAD      | chr2p22-p21     | g4757895    | 'de novo' pyrimidine base<br>biosynthetic process      | nucleotide binding<br>RNA 7-methylguanosine cap | 0.0063993  | 1.53816611  | DN |
| 213310_at   | EIF2C2   | chr8q24         | Hs.324504.1 | transcription                                          | binding                                         | 0.03157357 | 1.537430653 | DN |
| 219502_at   | NEIL3    | chr4q34.3       | g8922721    | DNA repair<br>microtubule-based                        | bubble DNA binding                              | 0.03116625 | 1.537112103 | DN |
| 203087_s_at | KIF2A    | chr5q12-q13     | g4758643    | movement                                               | nucleotide binding                              | 0.0490348  | 1.534758633 | DN |
| 221020_s_at | SLC25A32 | chr8q22.3       | g13540550   | transport                                              | transporter activity                            | 0.01022993 | 1.531071242 | DN |
| 208079_s_at | AURKA    | chr20q13        | g4507278    | mitotic cell cycle                                     | nucleotide binding                              | 0.00187265 | 1.529332294 | DN |
| 209501_at   | CDR2     | chr16p12.3      | Hs.75124.0  | NA                                                     | protein binding                                 | 5.99E-05   | 1.526055365 | DN |
| 217833_at   | SYNCRIP  | chr6q14-q15     | Hs.155489.0 | RNA processing                                         | nucleotide binding                              | 0.00260188 | 1.525767976 | DN |
| 221779_at   | MICALL1  | chr22q13.1      | Hs.8535.0   | NA                                                     | zinc ion binding                                | 0.02936283 | 1.52438726  | DN |
| 204113_at   | CELF1    | chr11p11        | g5729793    | mRNA splice site selection<br>multicellular organismal | nucleotide binding                              | 0.00045353 | 1.521408592 | DN |
| 210298_x_at | FHL1     | chrXq26         | g3851649    | development<br>regulation of the force of              | protein binding                                 | 0.02013934 | 1.51997584  | DN |
| 220948_s_at | ATP1A1   | chr1p21         | g4502268    | heart contraction                                      | nucleotide binding<br>transcription cofactor    | 0.00027967 | 1.51855952  | DN |
| 202642_s_at | TRRAP    | chr7q21.2-q22.1 | g4507690    | transcription                                          | activity                                        | 0.04796571 | 1.517333517 | DN |
| 218829_s_at | CHD7     | chr8q12.2       | g8923329    | skeletal system development                            | nucleotide binding                              | 0.00757222 | 1.51540893  | DN |
| 204682_at   | LTBP2    | chr14q24        | g4557732    | protein targeting                                      | binding                                         | 0.00637172 | 1.513554101 | DN |
| 219320_at   | MYO19    | chr17q12        | g13376680   | NA                                                     | nucleotide binding                              | 0.00602838 | 1.510945613 | DN |
| 213523_at   | CCNE1    | chr19q12        | Hs.9700.0   | G1/S transition of mitotic cell<br>cycle               | transcription coactivator<br>activity           | 0.0365157  | 1.509641563 | DN |
| 211966_at   | COL4A2   | chr13q34        | Hs.75617.0  | angiogenesis                                           | extracellular matrix<br>structural constituent  | 0.03118893 | 1.507691858 | DN |
| 203755_at   | BUB1B    | chr15q15        | g5729749    | protein phosphorylation                                | nucleotide binding                              | 0.03568129 | 1.505330749 | DN |

|           |        |                  |          |                           |                      |            |                |
|-----------|--------|------------------|----------|---------------------------|----------------------|------------|----------------|
| 201129_at | SRSF7  | chr2p22.1        | g6857827 | mRNA processing           | nucleotide binding   | 0.03623973 | 1.505322645 DN |
| 205870_at | BDKRB2 | chr14q32.1-q32.2 | g4557358 | smooth muscle contraction | protease binding     | 0.02218647 | 1.502469867 DN |
| 205053_at | PRIM1  | chr12q13         | g4506050 | DNA replication           | DNA primase activity | 0.00544954 | 1.500351305 DN |

Suppl. Table 2: Genes altered during proliferation in 3D culture

| Probe ID    | Gene symbol | Chromosome                 | Transcript ID | Biological process                                                                                | Molecular function                                                        | P value    | Fold change | Shape |
|-------------|-------------|----------------------------|---------------|---------------------------------------------------------------------------------------------------|---------------------------------------------------------------------------|------------|-------------|-------|
| 213796_at   | SPRR1A      | chr1q21-q22                | Hs.46320.0    | epidermis development                                                                             | structural molecule activity                                              | 0.0470852  | 11.16479432 | UP    |
| 219434_at   | TREM1       | chr6p21.1                  | g8924261      | humoral immune response                                                                           | receptor activity                                                         | 0.00117867 | 7.183657699 | UP    |
| 205199_at   | CA9         | chr9p12                    | g9955947      | response to hypoxia                                                                               | carbonate dehydratase activity                                            | 0.01422686 | 5.712946413 | UP    |
| 214549_x_at | SPRR1A      | chr1q21-q22                | Hs.211913.0   | epidermis development                                                                             | structural molecule activity                                              | 0.03229483 | 3.003405468 | UP    |
| 205916_at   | S100A7      | chr1q21                    | g9845518      | response to reactive oxygen species                                                               | calcium ion binding                                                       | 0.04001287 | 2.989617687 | UP    |
| 215734_at   | IZUMO4      | chr19p13.3                 | Hs.90010.1    | NA                                                                                                | NA                                                                        | 0.00449753 | 2.918968812 | UP    |
| 218990_s_at | SPRR3       | chr1q21-q22                | g4885606      | epidermis development<br>regulation of transforming growth factor beta receptor signaling pathway | structural molecule activity                                              | 0.00024275 | 2.639947612 | UP    |
| 201310_s_at | C5orf13     | chr5q22.1                  | g4758865      | creatine metabolic process                                                                        | protein binding                                                           | 0.02095206 | 2.541172877 | UP    |
| 202219_at   | SLC6A8      | chrXq28                    | g5032096      | copulation                                                                                        | creatine transporter activity                                             | 0.00066909 | 2.450089324 | UP    |
| 203691_at   | PI3         | chr20q13.12<br>chr12p13.3- | g4505786      | response to hypoxia                                                                               | endopeptidase inhibitor activity                                          | 0.04797757 | 2.418142287 | UP    |
| 211600_at   | PTPRO       | p13.2 12p13-p12            | g885925       | peptidyl-proline hydroxylation to 4-hydroxy-L-proline                                             | NADH dehydrogenase activity<br>procollagen-proline 4-dioxygenase activity | 0.00256033 | 2.349068487 | UP    |
| 207543_s_at | P4HA1       | chr10q21.3-q23.1           | g4505564      | response to metal ion                                                                             | protein binding                                                           | 2.82E-05   | 2.204261187 | UP    |
| 200632_s_at | NDRG1       | chr8q24.3                  | g5174656      | response to stress                                                                                | nucleotide binding                                                        | 0.04845627 | 1.972403602 | UP    |
| 200811_at   | CIRBP       | chr19p13.3                 | g4502846      | NA                                                                                                | protein binding                                                           | 0.00344116 | 1.95390981  | UP    |
| 209049_s_at | ZMYND8      | chr20q13.12                | g12654362     | cholesterol homeostasis                                                                           | protein binding                                                           | 0.04992623 | 1.910050475 | UP    |
| 209373_at   | MALL        | chr2q13                    | g13112010     | one-carbon metabolic process                                                                      | carbonate dehydratase activity                                            | 0.01046543 | 1.902277346 | UP    |
| 204508_s_at | CA12        | chr15q22                   | g12654376     | NA                                                                                                | protein kinase C binding                                                  | 0.04345563 | 1.840705274 | UP    |
| 213010_at   | PRKCDBP     | chr11p15.4                 | Hs.85181.1    | NA                                                                                                | protein binding                                                           | 0.01834214 | 1.818351087 | UP    |
| 209048_s_at | ZMYND8      | chr20q13.12                | Hs.75871.0    | one-carbon metabolic process                                                                      | carbonate dehydratase activity                                            | 0.02543175 | 1.813848067 | UP    |
| 203963_at   | CA12        | chr15q22                   | g9951924      | mRNA processing                                                                                   | nucleotide binding                                                        | 0.0072387  | 1.809732993 | UP    |
| 201129_at   | SRSF7       | chr2p22.1                  | g6857827      | DNA replication                                                                                   | protein binding                                                           | 0.00609773 | 1.807306558 | UP    |
| 221521_s_at | GINS2       | chr16q24.1                 | g13112024     | protein polyubiquitination                                                                        | ubiquitin-protein ligase activity                                         | 0.00484257 | 1.794902026 | UP    |
| 218585_s_at | DTL         | chr1q32                    | g7705575      | negative regulation of transcription from RNA polymerase II promoter                              | enzyme inhibitor activity                                                 | 0.00017285 | 1.791053965 | UP    |
| 201009_s_at | TXNIP       | chr1q21.1                  | Hs.179526.0   | transcription from RNA polymerase II promoter                                                     | binding                                                                   | 0.0254157  | 1.780684955 | UP    |
| 207020_at   | HSF2BP      | chr21q22.3                 | g5901979      |                                                                                                   |                                                                           |            |             |       |



|            |             |                 |             |                                    |                                   |            |             |    |
|------------|-------------|-----------------|-------------|------------------------------------|-----------------------------------|------------|-------------|----|
| 201194_at  | SEPW1       | chr19q13.3      | g4506886    | cell redox homeostasis             | selenium binding                  | 0.00316891 | 1.76370618  | UP |
| 204839_at  | POP5        | chr12q24.31     | g7705422    | tRNA processing                    | ribonuclease P activity           | 0.02928385 | 1.715381402 | UP |
| 208804_s_a |             |                 |             |                                    |                                   |            |             |    |
| t          | SRSF6       | chr20q12-q13.1  | Hs.6891.1   | mRNA splice site selection         | nucleotide binding                | 0.0167081  | 1.714845705 | UP |
| 59625_at   | NOL3        | chr16q22.1      | 4854714_RC  | response to hypoxia                | RNA binding                       | 0.03960688 | 1.708885274 | UP |
| 211695_x_a |             |                 |             |                                    |                                   |            |             |    |
| t          | MUC1        | chr1q21         | g13560650   | female pregnancy                   | NA                                | 0.0131656  | 1.705864749 | UP |
| 221567_at  | NOL3        | chr16q22.1      | g3172418    | response to hypoxia                | RNA binding                       | 0.00791388 | 1.702731091 | UP |
| 209668_x_a |             |                 |             |                                    |                                   |            |             |    |
| t          | CES2        | chr16q22.1      | g2641989    | catabolic process                  | carboxylesterase activity         | 0.04604651 | 1.699518963 | UP |
|            | CEL ///     |                 |             |                                    |                                   |            |             |    |
| 205910_s_a | LOC10050820 |                 |             |                                    |                                   |            |             |    |
| t          | 6           | chr9q34.3       | g4502770    | lipid metabolic process            | catalytic activity                | 0.01295446 | 1.697115227 | UP |
| 212320_at  | TUBB        | chr6p21.33      | Hs.179661.5 | cellular component movement        | nucleotide binding                | 0.00147298 | 1.695561715 | UP |
| 205076_s_a |             |                 |             |                                    |                                   |            |             |    |
| t          | MTMR11      | chr1q12-q21     | g5870890    | dephosphorylation                  | phosphatase activity              | 0.04316674 | 1.684615374 | UP |
| 218012_at  | TSPYL2      | chrXp11.2       | g11545834   | nucleosome assembly                | rDNA binding                      | 0.00052802 | 1.672636672 | UP |
| 221211_s_a |             |                 |             |                                    |                                   |            |             |    |
| t          | C21orf7     | chr21q22.3      | g9910145    | NA                                 | protein binding                   | 0.01497755 | 1.669100045 | UP |
| 202154_x_a |             |                 |             |                                    |                                   |            |             |    |
| t          | TUBB3       | chr16q24.3      | g5174736    | microtubule-based process          | nucleotide binding                | 0.03736439 | 1.666813987 | UP |
| 208977_x_a |             |                 |             |                                    |                                   |            |             |    |
| t          | TUBB2C      | chr9q34         | g13278848   | cellular component movement        | nucleotide binding                | 0.00261197 | 1.664885437 | UP |
| 204430_s_a |             |                 |             |                                    |                                   |            |             |    |
| t          | SLC2A5      | chr1p36.2       | g4507012    | carbohydrate metabolic process     | transporter activity              | 0.01586505 | 1.662148519 | UP |
| 218717_s_a |             |                 |             |                                    |                                   |            |             |    |
| t          | LEPREL1     | chr3q28         | g8922618    | oxidation reduction                | binding                           | 0.00677108 | 1.661163332 | UP |
| 45714_at   | HCFC1R1     | chr16p13.3      | 4893136_RC  | NA                                 | NA                                | 0.02513774 | 1.658637698 | UP |
| 206758_at  | EDN2        | chr1p34         | g4503462    | prostaglandin biosynthetic process | hormone activity                  | 0.04850633 | 1.657610251 | UP |
| 218537_at  | HCFC1R1     | chr16p13.3      | g8923535    | NA                                 | NA                                | 0.01792936 | 1.654258448 | UP |
| 200953_s_a |             |                 |             |                                    |                                   |            |             |    |
| t          | CCND2       | chr12p13        | g4502616    | ovarian follicle development       | protein binding                   | 0.01486815 | 1.624723471 | UP |
| 209125_at  | KRT6A       | chr12q12-q13    | Hs.111758.0 | cytoskeleton organization          | structural molecule activity      | 0.03237323 | 1.622205287 | UP |
| 210638_s_a |             |                 |             |                                    |                                   |            |             |    |
| t          | FBXO9       | chr6p12.3-p11.2 | g6103646    | protein ubiquitination             | ubiquitin-protein ligase activity | 0.04196354 | 1.621979692 | UP |
| 219737_s_a |             |                 |             |                                    |                                   |            |             |    |
| t          | PCDH9       | chr13q21.32     | Hs.12450.0  | cell adhesion                      | calcium ion binding               | 0.04622183 | 1.621170244 | UP |
| 218355_at  | KIF4A       | chrXq13.1       | g7305204    | organelle organization             | nucleotide binding                | 0.01135347 | 1.614970926 | UP |
| 209365_s_a |             |                 |             |                                    |                                   |            |             |    |
| t          | ECM1        | chr1q21         | g1488323    | ossification                       | protease binding                  | 0.00358371 | 1.61244329  | UP |
| 202708_s_a |             |                 |             |                                    |                                   |            |             |    |
| t          | HIST2H2BE   | chr1q21.2       | g4504276    | nucleosome assembly                | DNA binding                       | 0.0290849  | 1.610687558 | UP |

|            |          |                  |             |                                                                                                                            |                                                   |            |             |    |
|------------|----------|------------------|-------------|----------------------------------------------------------------------------------------------------------------------------|---------------------------------------------------|------------|-------------|----|
| 202729_s_a |          |                  |             | negative regulation of transforming growth factor beta receptor signaling pathway by extracellular sequestering of TGFbeta | transforming growth factor beta receptor activity | 0.02503867 | 1.607988802 | UP |
| t          | LTBP1    | chr2p22-p21      | g4557730    |                                                                                                                            |                                                   |            |             |    |
| 211240_x_a |          |                  |             | morphogenesis of a polarized epithelium                                                                                    | binding                                           | 9.03E-05   | 1.598214395 | UP |
| t          | CTNND1   | chr11q11         | g2224708    |                                                                                                                            |                                                   |            |             |    |
| 203592_s_a |          |                  |             | ossification                                                                                                               | fibronectin binding                               | 0.00338497 | 1.59771251  | UP |
| t          | FSTL3    | chr19p13         | g5031700    |                                                                                                                            |                                                   |            |             |    |
| 209068_at  | HNRPDL   | chr4q21.22       | g3218539    | transcription                                                                                                              | nucleotide binding                                | 0.0020199  | 1.585478564 | UP |
| 212657_s_a |          |                  |             | chronic inflammatory response to antigenic stimulus                                                                        | receptor activity                                 | 0.03716357 | 1.575281937 | UP |
| t          | IL1RN    | chr2q14.2        | Hs.81134.0  |                                                                                                                            |                                                   |            |             |    |
| 201251_at  | PKM2     | chr15q22         | g4505838    | glycolysis                                                                                                                 | nucleotide binding                                | 0.00777456 | 1.564035895 | UP |
| 221591_s_a |          |                  |             | NA                                                                                                                         | protein binding                                   | 0.01297957 | 1.563284738 | UP |
| t          | FAM64A   | chr17p13.2       | g13436475   |                                                                                                                            |                                                   |            |             |    |
| 200646_s_a |          |                  |             | NA                                                                                                                         | DNA binding                                       | 0.04012929 | 1.561567329 | UP |
| t          | NUCB1    | chr19q13.33      | g5453817    |                                                                                                                            |                                                   |            |             |    |
| 212037_at  | PNN      | chr14q21.1       | Hs.44499.3  | transcription                                                                                                              | DNA binding                                       | 0.00695029 | 1.552464734 | UP |
| 200075_s_a |          |                  |             | purine nucleotide metabolic process                                                                                        | nucleotide binding                                | 0.00598959 | 1.541146483 | UP |
| t          | GUK1     | chr1q32-q41      | g13623296   |                                                                                                                            |                                                   |            |             |    |
| 206081_at  | SLC24A1  | chr15q22         | g4759127    | transport                                                                                                                  | protein binding                                   | 0.02376262 | 1.53948547  | UP |
| 201116_s_a |          |                  |             | cardiac left ventricle morphogenesis                                                                                       | carboxypeptidase activity                         | 0.00344995 | 1.531263553 | UP |
| t          | CPE      | chr4q32.3        | Hs.75360.0  |                                                                                                                            |                                                   |            |             |    |
| 213867_x_a |          |                  |             | cellular component movement                                                                                                | nucleotide binding                                | 0.00956079 | 1.529859351 | UP |
| t          | ACTB     | chr7p22          | Hs.288061.2 |                                                                                                                            |                                                   |            |             |    |
| 209182_s_a |          |                  |             | NA                                                                                                                         | NA                                                | 0.00014876 | 1.519638541 | UP |
| t          | C10orf10 | chr10q11.21      | Hs.93675.0  |                                                                                                                            |                                                   |            |             |    |
| 218726_at  | HJURP    | chr2q37.1        | g8922180    | cell cycle                                                                                                                 | DNA binding                                       | 0.00120917 | 1.507106182 | UP |
| 201090_x_a |          |                  |             | microtubule-based process                                                                                                  | nucleotide binding                                | 0.01577548 | 1.50474017  | UP |
| t          | TUBA1B   | chr12q13.12      | g5174476    |                                                                                                                            |                                                   |            |             |    |
| 217645_at  | COX16    | chr14q24.2       | Hs.312076.0 | NA                                                                                                                         | NA                                                | 0.03457178 | 1.504536527 | UP |
| 202338_at  | TK1      | chr17q23.2-q25.3 | g4507518    | nucleobase, nucleoside, nucleotide and nucleic acid metabolic process                                                      | nucleotide binding                                | 0.00856967 | 1.503570444 | UP |
| 215867_x_a |          |                  |             | one-carbon metabolic process                                                                                               | carbonate dehydratase activity                    | 0.01738627 | 1.500621624 | UP |
| t          | CA12     | chr15q22         | Hs.5344.2   |                                                                                                                            |                                                   |            |             |    |
| 215223_s_a |          |                  |             | response to reactive oxygen species                                                                                        | superoxide dismutase activity                     | 0.01121611 | 5.573228162 | DN |
| t          | SOD2     | chr6q25.3        | Hs.318885.2 |                                                                                                                            |                                                   |            |             |    |
| 216841_s_a |          |                  |             | response to reactive oxygen species                                                                                        | superoxide dismutase activity                     | 0.00034419 | 5.0153683   | DN |
| t          | SOD2     | chr6q25.3        | Hs.318885.1 |                                                                                                                            |                                                   |            |             |    |
| 204818_at  | HSD17B2  | chr16q24.1-q24.2 | g4504502    | steroid biosynthetic process                                                                                               | catalytic activity                                | 0.01464371 | 4.787749805 | DN |
| 222062_at  | IL27RA   | chr19p13.11      | Hs.132781.1 | positive regulation of T-helper 1 type immune response                                                                     | receptor activity                                 | 0.00550158 | 4.350749176 | DN |
| 203946_s_a |          |                  |             | urea cycle                                                                                                                 | arginase activity                                 | 7.52E-05   | 3.920730358 | DN |
| t          | ARG2     | chr14q24.1       | g1763757    |                                                                                                                            |                                                   |            |             |    |
| 205899_at  | CCNA1    | chr13q12.3-q13   | g4502610    | cell cycle                                                                                                                 | protein binding                                   | 5.82E-05   | 3.837808433 | DN |

|             |          |                  |             |                                                                                       |                                                                   |            |             |    |
|-------------|----------|------------------|-------------|---------------------------------------------------------------------------------------|-------------------------------------------------------------------|------------|-------------|----|
| 221477_s_at | SOD2     | chr6q25.3        | Hs.177781.0 | response to reactive oxygen species<br>positive regulation of immune system           | superoxide dismutase activity                                     | 0.00721837 | 3.646296492 | DN |
| 39248_at    | AQP3     | chr9p13          | 4855867_RC  | process                                                                               | transporter activity                                              | 0.00735656 | 3.499812548 | DN |
| 210538_s_at | BIRC3    | chr11q22         | g1145290    | apoptosis                                                                             | ubiquitin-protein ligase activity                                 | 0.01112174 | 3.282091855 | DN |
| 201839_s_at | EPCAM    | chr2p21          | g4505058    | ureteric bud development                                                              | protein binding                                                   | 0.00637677 | 3.208840284 | DN |
| 201141_at   | GNPMB    | chr7p15          | g4505404    | osteoblast differentiation                                                            | integrin binding                                                  | 0.01389104 | 3.029541728 | DN |
| 204224_s_at | GCH1     | chr14q22.1-q22.2 | g4503948    | GTP catabolic process                                                                 | nucleotide binding                                                | 0.02670599 | 2.972685994 | DN |
| 201272_at   | AKR1B1   | chr7q35          | g4502048    | carbohydrate metabolic process<br>microtubule cytoskeleton                            | aldehyde reductase activity                                       | 0.00433341 | 2.920606803 | DN |
| 202289_s_at | TACC2    | chr10q26         | g11119413   | organization<br>protein import into nucleus,<br>translocation                         | protein domain specific binding                                   | 0.00269222 | 2.909230414 | DN |
| 203140_at   | BCL6     | chr3q27          | g4502382    | transcription from RNA polymerase II<br>promoter                                      | nucleic acid binding                                              | 0.00102043 | 2.881890224 | DN |
| 207469_s_at | PIR      | chrXp22.2        | g4505822    | transcription cofactor activity                                                       | transcription cofactor activity                                   | 0.00064676 | 2.862077019 | DN |
| 209774_x_at | CXCL2    | chr4q21          | g183626     | chemotaxis                                                                            | cytokine activity                                                 | 0.0492251  | 2.809358298 | DN |
| 203914_x_at | HPGD     | chr4q34-q35      | g4504478    | lipid metabolic process                                                               | catalytic activity                                                | 0.01925175 | 2.776123954 | DN |
| 201721_s_at | LAPTM5   | chr1p34          | g5803055    | transport<br>nucleobase, nucleoside, nucleotide<br>and nucleic acid metabolic process | NA                                                                | 0.00052361 | 2.754185051 | DN |
| 205552_s_at | OAS1     | chr12q24.1       | g8051622    | nucleotide binding                                                                    | nucleotide binding                                                | 0.00109737 | 2.729407642 | DN |
| 209699_x_at | AKR1C2   | chr10p15-p14     | g531159     | lipid metabolic process                                                               | oxidoreductase activity                                           | 3.23E-05   | 2.673789425 | DN |
| 212314_at   | SEL1L3   | chr4p15.2        | Hs.49500.0  | NA                                                                                    | binding                                                           | 0.01036948 | 2.661259552 | DN |
| 212070_at   | GPR56    | chr16q13         | Hs.6527.1   | cell adhesion                                                                         | signal transducer activity                                        | 0.00317779 | 2.628257114 | DN |
| 202833_s_at | SERPINA1 | chr14q32.1       | g4505792    | response to hypoxia                                                                   | protease binding                                                  | 0.00013625 | 2.599077269 | DN |
| 201720_s_at | LAPTM5   | chr1p34          | Hs.79356.0  | transport<br>microtubule cytoskeleton                                                 | NA                                                                | 0.00516505 | 2.540330795 | DN |
| 211382_s_at | TACC2    | chr10q26         | g7934571    | organization                                                                          | protein domain specific binding                                   | 0.00130945 | 2.525283597 | DN |
| 204279_at   | PSMB9    | chr6p21.3        | g4506204    | carbohydrate metabolic process                                                        | endopeptidase activity                                            | 0.00279127 | 2.5082324   | DN |
| 217739_s_at | NAMPT    | chr7q22.3        | g5031976    | nicotinamide metabolic process                                                        | nicotinate-nucleotide diphosphorylase<br>(carboxylating) activity | 0.00413222 | 2.421967739 | DN |
| 216594_x_at | AKR1C1   | chr10p15-p14     | Hs.306098.1 | lipid metabolic process<br>positive regulation of T cell mediated                     | aldo-keto reductase activity                                      | 0.00015818 | 2.376838078 | DN |
| 202307_s_at | TAP1     | chr6p21.3        | g9665247    | cytotoxicity                                                                          | nucleotide binding                                                | 0.00029084 | 2.33506965  | DN |

|            |          |               |             |                                               |                                              |            |             |    |  |
|------------|----------|---------------|-------------|-----------------------------------------------|----------------------------------------------|------------|-------------|----|--|
| 204151_x_a |          |               |             |                                               |                                              |            |             |    |  |
| t          | AKR1C1   | chr10p15-p14  | g5453542    | lipid metabolic process                       | aldo-keto reductase activity                 | 8.75E-05   | 2.333874668 | DN |  |
| 212902_at  | SEC24A   | chr5q31.1     | Hs.211612.0 | transport                                     | protein binding                              | 0.0033719  | 2.332092528 | DN |  |
| 203827_at  | WIPI1    | chr17q24.2    | g8922207    | autophagy                                     | receptor binding                             | 0.01160138 | 2.324053599 | DN |  |
| 219648_at  | MREG     | chr2q35       | g8922236    | melanocyte differentiation                    | NA                                           | 0.01171329 | 2.287547745 | DN |  |
| 211429_s_a |          |               |             |                                               |                                              |            |             |    |  |
| t          | SERPINA1 | chr14q32.1    | g7770182    | response to hypoxia                           | protease binding                             | 0.00221535 | 2.261449099 | DN |  |
| 219188_s_a |          |               |             |                                               |                                              |            |             |    |  |
| t          | MACROD1  | chr11q11      | g13569839   | NA                                            | NA                                           | 0.01415362 | 2.244412598 | DN |  |
| 203634_s_a |          |               |             |                                               | carnitine O-palmitoyltransferase activity    |            |             |    |  |
| t          | CPT1A    | chr11q13.2    | g4503020    | glucose metabolic process                     | activity                                     | 0.00920946 | 2.235522061 | DN |  |
| 212694_s_a |          |               |             |                                               |                                              |            |             |    |  |
| t          | PCCB     | chr3q21-q22   | Hs.63788.0  | fatty acid biosynthetic process               | nucleotide binding                           | 0.00267635 | 2.22758     | DN |  |
| 208146_s_a |          |               |             |                                               |                                              |            |             |    |  |
| t          | CPVL     | chr7p15.1     | g13786124   | proteolysis                                   | carboxypeptidase activity                    | 0.03959927 | 2.220522167 | DN |  |
| 213112_s_a |          |               |             | ubiquitin-dependent protein catabolic process | protein kinase C binding                     |            |             |    |  |
| t          | SQSTM1   | chr5q35       | Hs.279891.1 | release of cytochrome c from mitochondria     | death receptor binding                       | 0.00176014 | 2.185053274 | DN |  |
| 211725_s_a |          |               |             |                                               |                                              |            |             |    |  |
| t          | BID      | chr22q11.1    | g13543452   |                                               |                                              | 0.00016139 | 2.174335188 | DN |  |
| 207275_s_a |          |               |             |                                               |                                              |            |             |    |  |
| t          | ACSL1    | chr4q35       | g4503650    | lipid metabolic process                       | nucleotide binding                           | 0.00974831 | 2.170163433 | DN |  |
|            |          |               |             |                                               | carnitine O-palmitoyltransferase activity    |            |             |    |  |
| 203633_at  | CPT1A    | chr11q13.2    | Hs.259785.0 | glucose metabolic process                     | activity                                     | 0.00177808 | 2.167571828 | DN |  |
| 208700_s_a |          |               |             |                                               |                                              |            |             |    |  |
| t          | TKT      | chr3p14.3     | g388890     | pentose-phosphate shunt                       | magnesium ion binding                        | 0.00014843 | 2.166627715 | DN |  |
| 211275_s_a |          |               |             |                                               |                                              |            |             |    |  |
| t          | GYG1     | chr3q24-q25.1 | g5814084    | glycogen biosynthetic process                 | protein binding                              | 0.01391749 | 2.147815781 | DN |  |
| 219869_s_a |          |               |             |                                               | metal ion transmembrane transporter activity |            |             |    |  |
| t          | SLC39A8  | chr4q22-q24   | g11545899   | transport                                     | activity                                     | 0.01420496 | 2.133346824 | DN |  |
| 206857_s_a |          |               |             |                                               | peptidyl-prolyl cis-trans isomerase activity |            |             |    |  |
| t          | FKBP1B   | chr2p23.3     | g4758379    | regulation of heart rate                      | activity                                     | 0.00926    | 2.124510336 | DN |  |
| 221675_s_a |          |               |             |                                               | diacylglycerol                               |            |             |    |  |
| t          | CHPT1    | chr12q        | g9502012    | regulation of cell growth                     | cholinephosphotransferase activity           | 0.0007224  | 2.114612372 | DN |  |
| 203414_at  | MMD      | chr17q        | g6912507    | cytolysis                                     | receptor activity                            | 0.03052956 | 2.107968377 | DN |  |
|            |          |               |             | release of cytochrome c from mitochondria     | death receptor binding                       |            |             |    |  |
| 204493_at  | BID      | chr22q11.1    | g4557360    |                                               |                                              | 0.00229321 | 2.097643849 | DN |  |
| 221985_at  | KLHL24   | chr3q27.1     | Hs.246875.1 | NA                                            | protein binding                              | 0.00010798 | 2.096599338 | DN |  |
|            |          |               |             | very long-chain fatty acid metabolic process  |                                              |            |             |    |  |
| 205769_at  | SLC27A2  | chr15q21.2    | g4503652    |                                               | nucleotide binding                           | 0.04042651 | 2.095529446 | DN |  |
| 211653_x_a |          |               |             |                                               |                                              |            |             |    |  |
| t          | AKR1C2   | chr10p15-p14  | g187444     | lipid metabolic process                       | oxidoreductase activity                      | 0.00054294 | 2.092140809 | DN |  |
| 205960_at  | PDK4     | chr7q21.3     | g4505692    | carbohydrate metabolic process                | two-component sensor activity                | 0.03756094 | 2.089678431 | DN |  |
| 206508_at  | CD70     | chr19p13      | g4507604    | induction of apoptosis                        | receptor binding                             | 0.03572922 | 2.088785127 | DN |  |

|            |            |                    |             |                                          |                                             |            |             |    |
|------------|------------|--------------------|-------------|------------------------------------------|---------------------------------------------|------------|-------------|----|
| 202017_at  | EPHX1      | chr1q42.1          | g4557560    | cellular aromatic compound               |                                             |            |             |    |
| 218627_at  | DRAM1      | chr12q23.2         | g8922957    | metabolic process                        | catalytic activity                          | 0.0198322  | 2.080684315 | DN |
|            |            |                    |             | autophagy                                | NA                                          | 0.01174067 | 2.075153897 | DN |
|            |            |                    |             | response to molecule of bacterial origin |                                             |            |             |    |
| 201743_at  | CD14       | chr5q22-q32 5q31.1 | g4557416    |                                          | lipopolysaccharide binding                  | 0.01592359 | 2.069115862 | DN |
| 210285_x_a |            |                    |             |                                          |                                             |            |             |    |
| t          | WTAP       | chr6q25-q27        | g12653228   | mRNA processing                          | NA                                          | 0.0052485  | 2.053515845 | DN |
| 206295_at  | IL18       | chr11q22.2-q22.3   | g4504652    | angiogenesis                             | signal transducer activity                  | 0.00918927 | 2.050092548 | DN |
| 208691_at  | TFRC       | chr3q29            | g12654696   | response to hypoxia                      | receptor activity                           | 0.01932544 | 2.049638652 | DN |
| 213836_s_a |            |                    |             |                                          |                                             |            |             |    |
| t          | WIP1       | chr17q24.2         | Hs.279937.1 | autophagy                                | receptor binding                            | 0.00550884 | 2.040195901 | DN |
| 207332_s_a |            |                    |             |                                          |                                             |            |             |    |
| t          | TFRC       | chr3q29            | g4507456    | response to hypoxia                      | receptor activity                           | 0.00640869 | 2.035533696 | DN |
| 206656_s_a |            |                    |             |                                          |                                             |            |             |    |
| t          | C20orf3    | chr20p11.2         | g12653170   | biosynthetic process                     | arylesterase activity                       | 0.01336888 | 2.034028039 | DN |
| 201554_x_a |            |                    |             |                                          |                                             |            |             |    |
| t          | GYG1       | chr3q24-q25.1      | g4758491    | glycogen biosynthetic process            | protein binding                             | 6.32E-05   | 2.030678767 | DN |
| 205992_s_a |            |                    |             |                                          |                                             |            |             |    |
| t          | IL15       | chr4q31            | g10835152   | NK T cell proliferation                  | signal transducer activity                  | 0.02901042 | 2.022977559 | DN |
| 201243_s_a |            |                    |             |                                          | sodium:potassium-exchanging ATPase activity |            |             |    |
| t          | ATP1B1     | chr1q24            | g4502276    | response to hypoxia                      | activity                                    | 0.01938636 | 2.017682667 | DN |
| 204059_s_a |            |                    |             |                                          |                                             |            |             |    |
| t          | ME1        | chr6q12            | g13435400   | carbohydrate metabolic process           | catalytic activity                          | 0.00369093 | 2.006207763 | DN |
| 208699_x_a |            |                    |             |                                          |                                             |            |             |    |
| t          | TKT        | chr3p14.3          | Hs.89643.0  | pentose-phosphate shunt                  | magnesium ion binding                       | 0.00057158 | 2.002502194 | DN |
| 201790_s_a |            |                    |             |                                          |                                             |            |             |    |
| t          | DHCR7      | chr11q13.4         | Hs.11806.0  | blood vessel development                 | protein binding                             | 0.00808537 | 1.996692088 | DN |
| 209616_s_a |            |                    |             |                                          |                                             |            |             |    |
| t          | CES1       | chr16q22.2         | g688112     | metabolic process                        | carboxylesterase activity                   | 0.00441923 | 1.993194314 | DN |
| 202923_s_a |            |                    |             |                                          |                                             |            |             |    |
| t          | GCLC       | chr6p12            | g4557624    | cysteine metabolic process               | nucleotide binding                          | 0.00020483 | 1.992941982 | DN |
|            |            |                    |             |                                          | inositol or phosphatidylinositol            |            |             |    |
| 203126_at  | IMPA2      | chr18p11.2         | g7657235    | phosphate metabolic process              | phosphatase activity                        | 0.01356203 | 1.992744524 | DN |
| 201118_at  | PGD        | chr1p36.22         | g4505758    | pentose-phosphate shunt                  | catalytic activity                          | 0.00409666 | 1.988553933 | DN |
| 215785_s_a |            |                    |             |                                          |                                             |            |             |    |
| t          | CYFIP2     | chr5q33.3          | Hs.258503.2 | apoptosis                                | protein binding                             | 0.00033258 | 1.988198393 | DN |
| 201242_s_a |            |                    |             |                                          | sodium:potassium-exchanging ATPase activity |            |             |    |
| t          | ATP1B1     | chr1q24            | g12652534   | response to hypoxia                      | activity                                    | 0.0474456  | 1.984803632 | DN |
| 220937_s_a |            |                    |             |                                          |                                             |            |             |    |
| t          | ST6GALNAC4 | chr9q34            | g7657622    | protein glycosylation                    | sialyltransferase activity                  | 0.01492231 | 1.983139415 | DN |
| 211548_s_a |            |                    |             |                                          |                                             |            |             |    |
| t          | HPGD       | chr4q34-q35        | g1203981    | lipid metabolic process                  | catalytic activity                          | 0.01610898 | 1.976454395 | DN |
| 209529_at  | PPAP2C     | chr19p13           | g2911497    |                                          | NA                                          | 0.00762579 | 1.969412867 | DN |
| 209443_at  | SERPINA5   | chr14q32.1         | g180549     | spermatogenesis                          | protease binding                            | 0.03160893 | 1.962282785 | DN |

|            |           |                  |             |                                       |                                                |            |             |    |
|------------|-----------|------------------|-------------|---------------------------------------|------------------------------------------------|------------|-------------|----|
| 204675_at  | SRD5A1    | chr5p15          | g4507200    | lipid metabolic process               | 3-oxo-5-alpha-steroid 4-dehydrogenase activity | 0.01900823 | 1.961733651 | DN |
| 210663_s_a |           |                  |             |                                       |                                                |            |             |    |
| t          | KYNU      | chr2q22.2        | g12654128   | tryptophan catabolic process          | catalytic activity                             | 0.00431815 | 1.960261549 | DN |
| 202842_s_a |           | chr7q31 14q24.2- |             |                                       |                                                |            |             |    |
| t          | DNAJB9    | q24.3            | g5262493    | protein folding                       | protein binding                                | 0.00683844 | 1.956978819 | DN |
| 206377_at  | FOXF2     | chr6p25.3        | g4557594    | epithelial to mesenchymal transition  | DNA binding                                    | 0.01856352 | 1.956300974 | DN |
| 212335_at  | GNS       | chr12q14         | Hs.164036.0 | glycosaminoglycan catabolic process   | catalytic activity                             | 0.00291429 | 1.947213445 | DN |
| 203139_at  | DAPK1     | chr9q34.1        | g4826683    | protein phosphorylation               | nucleotide binding                             | 0.00021022 | 1.944380103 | DN |
| 210298_x_a |           |                  |             | multicellular organismal              |                                                |            |             |    |
| t          | FHL1      | chrXq26          | g3851649    | development                           | protein binding                                | 0.0042861  | 1.941708824 | DN |
| 219093_at  | PID1      | chr2q36.3        | g8923631    | NA                                    | NA                                             | 0.04269284 | 1.939606392 | DN |
| 209160_at  | AKR1C3    | chr10p15-p14     | g6624210    | prostaglandin metabolic process       | aldo-keto reductase activity                   | 0.0003125  | 1.937665571 | DN |
| 202587_s_a |           |                  |             | nucleobase, nucleoside, nucleotide    |                                                |            |             |    |
| t          | AK1       | chr9q34.1        | g12654562   | and nucleic acid metabolic process    | nucleotide binding                             | 0.00121479 | 1.931933901 | DN |
| 202946_s_a |           |                  |             |                                       |                                                |            |             |    |
| t          | BTBD3     | chr20p12.2       | g7662401    | NA                                    | protein binding                                | 0.01849196 | 1.929563743 | DN |
| 210971_s_a |           |                  |             | protein import into nucleus,          |                                                |            |             |    |
| t          | ARNTL     | chr11p15         | g2094740    | translocation                         | DNA binding                                    | 0.02621884 | 1.922803903 | DN |
| 213246_at  | C14orf109 | chr14q32.12      | Hs.275352.0 | NA                                    | NA                                             | 0.00628824 | 1.91841819  | DN |
| 211564_s_a |           |                  |             |                                       |                                                |            |             |    |
| t          | PDLIM4    | chr5q31.1        | g13111856   | NA                                    | protein binding                                | 0.02643988 | 1.90313617  | DN |
| 214696_at  | C17orf91  | chr17p13.3       | Hs.29206.0  | NA                                    | NA                                             | 0.00930131 | 1.896337893 | DN |
| 201963_at  | ACSL1     | chr4q35          | g12669906   | lipid metabolic process               | nucleotide binding                             | 0.01411763 | 1.887792098 | DN |
| 203925_at  | GCLM      | chr1p22.1        | g4504010    | cysteine metabolic process            | glutamate-cysteine ligase activity             | 0.00292286 | 1.886328307 | DN |
| 218092_s_a |           |                  |             |                                       |                                                |            |             |    |
| t          | AGFG1     | chr2q36.3        | g7262381    | acrosome assembly                     | DNA binding                                    | 0.00561287 | 1.885181886 | DN |
| 219911_s_a |           |                  |             |                                       |                                                |            |             |    |
| t          | SLCO4A1   | chr20q13.33      | g7706516    | transport                             | transporter activity                           | 0.03368462 | 1.884808326 | DN |
| 205449_at  | SAC3D1    | chr11q13.1       | g9558738    | cell cycle                            | protein binding                                | 0.00626475 | 1.873455352 | DN |
| 205968_at  | KCNS3     | chr2p24          | g4504862    | transport                             | ion channel activity                           | 0.004512   | 1.870488609 | DN |
| 200790_at  | ODC1      | chr2p25          | g4505488    | kidney development                    | catalytic activity                             | 0.01153827 | 1.85622168  | DN |
| 202722_s_a |           |                  |             |                                       | glutamine-fructose-6-phosphate                 |            |             |    |
| t          | GFPT1     | chr2p13          | g4503980    | chondrocyte development               | transaminase (isomerizing) activity            | 0.00093632 | 1.8536989   | DN |
| 200670_at  | XBP1      | chr22q12.1 22q12 | g4827057    | transcription                         | DNA binding                                    | 0.00221959 | 1.852252417 | DN |
| 212311_at  | SEL1L3    | chr4p15.2        | Hs.49500.0  | NA                                    | binding                                        | 0.00166778 | 1.849790706 | DN |
|            |           |                  |             |                                       | 3-chloroallyl aldehyde dehydrogenase activity  |            |             |    |
| 205623_at  | ALDH3A1   | chr17p11.2       | g4502034    | response to hypoxia                   |                                                | 0.04936598 | 1.849134213 | DN |
| 210372_s_a |           |                  |             |                                       |                                                |            |             |    |
| t          | TPD52L1   | chr6q22-q23      | g12246900   | G2/M transition of mitotic cell cycle | protein binding                                | 0.00057002 | 1.848123387 | DN |
| 218723_s_a |           |                  |             | regulation of cyclin-dependent        |                                                |            |             |    |
| t          | C13orf15  | chr13q14.11      | g7662650    | protein kinase activity               | protein binding                                | 0.0071129  | 1.846549566 | DN |
| 201471_s_a |           |                  |             | ubiquitin-dependent protein           |                                                |            |             |    |
| t          | SQSTM1    | chr5q35          | g4505570    | catabolic process                     | protein kinase C binding                       | 0.00469829 | 1.844272173 | DN |

|                 |          |                  |             |                                                                          |                                                                                          |            |             |    |
|-----------------|----------|------------------|-------------|--------------------------------------------------------------------------|------------------------------------------------------------------------------------------|------------|-------------|----|
| 218182_s_a<br>t | CLDN1    | chr3q28-q29      | g10863886   | cell adhesion                                                            | structural molecule activity                                                             | 0.01760066 | 1.844183419 | DN |
| 203973_s_a<br>t | CEBPD    | chr8p11.2-p11.1  | g4885130    | transcription<br>multicellular organismal                                | DNA binding                                                                              | 0.00033827 | 1.843660617 | DN |
| 209829_at       | FAM65B   | chr6p22.3-p21.32 | g2224712    | development                                                              | binding                                                                                  | 0.04972001 | 1.843211247 | DN |
| 213006_at       | CEBPD    | chr8p11.2-p11.1  | Hs.76722.1  | transcription                                                            | DNA binding                                                                              | 0.00366328 | 1.841146599 | DN |
| 200862_at       | DHCR24   | chr1p32.3        | g13375617   | steroid biosynthetic process                                             | catalytic activity                                                                       | 0.0010459  | 1.837999544 | DN |
| 218532_s_a<br>t | FAM134B  | chr5p15.1        | g9506660    | sensory perception of pain                                               | NA                                                                                       | 0.00082058 | 1.837913467 | DN |
| 202748_at       | GBP2     | chr1p22.2        | g6996011    | immune response                                                          | nucleotide binding                                                                       | 0.03457358 | 1.831042295 | DN |
| 209835_x_a<br>t | CD44     | chr11p13         | g13325117   | regulation of cell growth                                                | receptor activity                                                                        | 0.00508051 | 1.828529253 | DN |
| 201942_s_a<br>t | CPD      | chr17q11.2       | g3641620    | proteolysis                                                              | carboxypeptidase activity                                                                | 0.00433411 | 1.826079392 | DN |
| 217168_s_a<br>t | HERPUD1  | chr16q13         | Hs.146393.1 | cellular calcium ion homeostasis<br>multicellular organismal             | protein binding                                                                          | 0.00145142 | 1.822262285 | DN |
| 201539_s_a<br>t | FHL1     | chrXq26          | g2078479    | development                                                              | protein binding                                                                          | 0.00094484 | 1.822093261 | DN |
| 207096_at       | SAA4     | chr11p15.1-p14   | g10835094   | acute-phase response                                                     | NA                                                                                       | 0.04441883 | 1.819225813 | DN |
| 203913_s_a<br>t | HPGD     | chr4q34-q35      | Hs.77348.0  | lipid metabolic process                                                  | catalytic activity                                                                       | 0.01114103 | 1.810264603 | DN |
| 218651_s_a<br>t | LARP6    | chr15q23         | g8922933    | RNA processing                                                           | nucleotide binding                                                                       | 0.0415223  | 1.80653072  | DN |
| 207196_s_a<br>t | TNIP1    | chr5q32-q33.1    | g5174608    | translation                                                              | protein binding                                                                          | 0.02388755 | 1.79999197  | DN |
| 210136_at       | MBP      | chr18q23         | Hs.69547.4  | immune response                                                          | structural constituent of myelin sheath                                                  | 0.01898452 | 1.796589837 | DN |
| 217388_s_a<br>t | KYNU     | chr2q22.2        | Hs.169139.2 | tryptophan catabolic process                                             | catalytic activity<br>zinc ion transmembrane transporter<br>activity                     | 0.04528046 | 1.796447508 | DN |
| 212110_at       | SLC39A14 | chr8p21.3        | Hs.89868.0  | transport                                                                | activity                                                                                 | 0.00401985 | 1.79588525  | DN |
| 201791_s_a<br>t | DHCR7    | chr11q13.4       | g4503320    | blood vessel development<br>multicellular organismal                     | protein binding                                                                          | 0.00755098 | 1.788812716 | DN |
| 218603_at       | HECA     | chr6q23-q24      | g7706434    | development                                                              | NA                                                                                       | 0.02935009 | 1.787484947 | DN |
| 212508_at       | MOAP1    | chr14q32         | Hs.24719.0  | apoptosis                                                                | protein binding<br>adenosine receptor activity, G-protein<br>coupled                     | 0.03791211 | 1.780655681 | DN |
| 205891_at       | ADORA2B  | chr17p12         | g4501950    | activation of MAPK activity                                              | coupled                                                                                  | 0.00358163 | 1.779753728 | DN |
| 212160_at       | XPOT     | chr12q14.2       | Hs.85951.0  | tRNA export from nucleus<br>release of cytochrome c from<br>mitochondria | tRNA binding                                                                             | 0.0016334  | 1.778119728 | DN |
| 208791_at       | CLU      | chr8p21-p12      | g180619     | mitochondria                                                             | protein binding<br>glutamine-fructose-6-phosphate<br>transaminase (isomerizing) activity | 0.00786673 | 1.778110675 | DN |
| 205100_at       | GFPT2    | chr5q34-q35      | g4826741    | carbohydrate metabolic process                                           | transaminase (isomerizing) activity                                                      | 0.01524951 | 1.77745756  | DN |

|            |             |             |             |                                       |                                          |            |             |    |
|------------|-------------|-------------|-------------|---------------------------------------|------------------------------------------|------------|-------------|----|
| 205531_s_a |             |             |             |                                       |                                          |            |             |    |
| t          | GLS2        | chr12q13    | g7019388    | cellular amino acid metabolic process | glutaminase activity                     | 0.0312094  | 1.771580797 | DN |
| 209276_s_a |             |             |             |                                       |                                          |            |             |    |
| t          | GLRX        | chr5q14     | g5442445    | transport                             | electron carrier activity                | 0.01292571 | 1.769730733 | DN |
| 215990_s_a |             |             |             | protein import into nucleus,          |                                          |            |             |    |
| t          | BCL6        | chr3q27     | Hs.155024.1 | translocation                         | nucleic acid binding                     | 0.03219537 | 1.766846667 | DN |
| 209605_at  | TST         | chr22q13.1  | g1877030    | sulfate transport                     | thiosulfate sulfurtransferase activity   | 0.00588411 | 1.765243703 | DN |
| 204249_s_a |             |             |             |                                       |                                          |            |             |    |
| t          | LMO2        | chr11p13    | g6633806    | blood vessel development              | DNA binding                              | 0.03717352 | 1.764923589 | DN |
| 221589_s_a | LOC10050651 |             |             |                                       |                                          |            |             |    |
| t          | 7           | ---         | Hs.293970.1 | NA                                    | NA                                       | 0.03079668 | 1.762616481 | DN |
| 202238_s_a |             |             |             |                                       | nicotinamide N-methyltransferase         |            |             |    |
| t          | NNMT        | chr11q23.1  | g5453789    | NA                                    | activity                                 | 0.00770725 | 1.762348186 | DN |
| 218412_s_a |             |             |             |                                       |                                          |            |             |    |
| t          | GTF2IRD1    | chr7q11.23  | g7705386    | transcription                         | DNA binding                              | 0.00405088 | 1.757582967 | DN |
| 211373_s_a |             |             |             |                                       |                                          |            |             |    |
| t          | PSEN2       | chr1q31-q42 | g1079575    | response to hypoxia                   | endopeptidase activity                   | 0.01996941 | 1.753780371 | DN |
| 201626_at  | INSIG1      | chr7q36     | Hs.56205.0  | lipid metabolic process               | protein binding                          | 0.00868535 | 1.743345574 | DN |
| 221582_at  | HIST3H2A    | chr1q42.13  | g12654706   | nucleosome assembly                   | DNA binding                              | 0.02256542 | 1.743111246 | DN |
| 213187_x_a |             |             |             |                                       | cysteine-type endopeptidase inhibitor    |            |             |    |
| t          | FTL         | chr19q13.33 | Hs.324746.2 | skeletal system development           | activity                                 | 0.00077436 | 1.741875252 | DN |
| 201925_s_a |             |             |             | complement activation, classical      |                                          |            |             |    |
| t          | CD55        | chr1q32     | g10835142   | pathway                               | NA                                       | 0.01461848 | 1.737884582 | DN |
| 217909_s_a |             |             |             |                                       |                                          |            |             |    |
| t          | MLX         | chr17q21.1  | Hs.78185.0  | transcription                         | DNA binding                              | 0.023982   | 1.734735747 | DN |
| 204470_at  | CXCL1       | chr4q21     | g4504152    | chemotaxis                            | receptor binding                         | 0.01156711 | 1.734417663 | DN |
| 205770_at  | GSR         | chr8p21.1   | g10835188   | glutathione metabolic process         | glutathione-disulfide reductase activity | 0.01033249 | 1.727756506 | DN |
| 203124_s_a |             |             |             |                                       |                                          |            |             |    |
| t          | SLC11A2     | chr12q13    | g10835168   | transition metal ion transport        | transporter activity                     | 0.01706323 | 1.725281495 | DN |
| 210299_s_a |             |             |             | multicellular organismal              |                                          |            |             |    |
| t          | FHL1        | chrXq26     | g3859848    | development                           | protein binding                          | 2.06E-05   | 1.725003821 | DN |
|            |             |             |             | multicellular organismal              |                                          |            |             |    |
| 201540_at  | FHL1        | chrXq26     | g4503720    | development                           | protein binding                          | 0.01603302 | 1.716332245 | DN |
| 221986_s_a |             |             |             |                                       |                                          |            |             |    |
| t          | KLHL24      | chr3q27.1   | Hs.246875.1 | NA                                    | protein binding                          | 0.00034548 | 1.715870842 | DN |
| 206376_at  | SLC6A15     | chr12q21.3  | g8922349    | transport                             | neurotransmitter transporter activity    | 0.00338086 | 1.715627282 | DN |
| 218764_at  | PRKCH       | chr14q23.1  | g13129041   | protein phosphorylation               | nucleotide binding                       | 0.00775238 | 1.714025741 | DN |
| 204497_at  | ADCY9       | chr16p13.3  | Hs.20196.0  | cAMP biosynthetic process             | nucleotide binding                       | 0.01983825 | 1.713540971 | DN |
| 217826_s_a |             |             |             | post-translational protein            |                                          |            |             |    |
| t          | UBE2J1      | chr6q15     | g7706311    | modification                          | nucleotide binding                       | 0.04514101 | 1.710817674 | DN |
| 201468_s_a |             |             |             |                                       | NAD(P)H dehydrogenase (quinone)          |            |             |    |
| t          | NQO1        | chr16q22.1  | g4505414    | xenobiotic metabolic process          | activity                                 | 0.00228336 | 1.710367994 | DN |
| 203042_at  | LAMP2       | chrXq24     | g4504956    | NA                                    | NA                                       | 0.02285728 | 1.705683313 | DN |



|            |           |                  |             |                                     |                                        |            |             |    |
|------------|-----------|------------------|-------------|-------------------------------------|----------------------------------------|------------|-------------|----|
| 210802_s_a |           |                  |             |                                     | rRNA (adenine-N6,N6)-                  |            |             |    |
| t          | DIMT1L    | chr5q12.1        | g12803982   | rRNA modification                   | dimethyltransferase activity           | 0.00823995 | 1.705626588 | DN |
| 45288_at   | ABHD6     | chr3p14.3        | 4890230_RC  | NA                                  | catalytic activity                     | 0.02321196 | 1.705483153 | DN |
| 202679_at  | NPC1      | chr18q11-q12     | g4557802    | endocytosis                         | receptor activity                      | 0.00781539 | 1.704473148 | DN |
| 203647_s_a |           |                  |             | generation of precursor metabolites |                                        |            |             |    |
| t          | FDX1      | chr11q22         | g182493     | and energy                          | iron ion binding                       | 0.00730128 | 1.701526171 | DN |
| 214505_s_a |           |                  |             | multicellular organismal            |                                        |            |             |    |
| t          | FHL1      | chrXq26          | Hs.239069.2 | development                         | protein binding                        | 0.00516424 | 1.698461104 | DN |
| 208788_at  | ELOVL5    | chr6p21.1-p12.1  | g12053372   | fatty acid biosynthetic process     | fatty acid elongase activity           | 0.00560792 | 1.692239154 | DN |
| 211337_s_a |           |                  |             | microtubule cytoskeleton            |                                        |            |             |    |
| t          | TUBGCP4   | chr15q15         | g12803021   | organization                        | structural constituent of cytoskeleton | 0.00014767 | 1.689922304 | DN |
| 219129_s_a |           |                  |             |                                     |                                        |            |             |    |
| t          | SAP30L    | chr5q33.2        | g13375861   | transcription                       | DNA binding                            | 0.00891916 | 1.688138639 | DN |
| 202069_s_a |           |                  |             |                                     |                                        |            |             |    |
| t          | IDH3A     | chr15q25.1-q25.2 | Hs.250616.0 | carbohydrate metabolic process      | magnesium ion binding                  | 0.02732372 | 1.686095336 | DN |
| 209020_at  | C20orf111 | chr20q13.11      | g7688970    | NA                                  | NA                                     | 0.00925471 | 1.682956923 | DN |
| 218196_at  | OSTM1     | chr6q21          | g7661737    | osteoclast differentiation          | protein binding                        | 0.00459602 | 1.682563894 | DN |
|            |           |                  |             | cellular aromatic compound          |                                        |            |             |    |
| 209218_at  | SQLE      | chr8q24.1        | g4204674    | metabolic process                   | monooxygenase activity                 | 0.02263103 | 1.681756509 | DN |
| 217741_s_a |           |                  |             |                                     |                                        |            |             |    |
| t          | ZFAND5    | chr9q13-q21      | Hs.3776.0   | in utero embryonic development      | DNA binding                            | 0.03041625 | 1.679911879 | DN |
| 210220_at  | FZD2      | chr17q21.1       | g736678     | signal transduction                 | signal transducer activity             | 0.00555101 | 1.677720698 | DN |
|            |           |                  |             |                                     | nicotinamide N-methyltransferase       |            |             |    |
| 202237_at  | NNMT      | chr11q23.1       | g5453789    | NA                                  | activity                               | 0.02729749 | 1.677284019 | DN |
| 204908_s_a |           |                  |             | protein import into nucleus,        |                                        |            |             |    |
| t          | BCL3      | chr19q13.1-q13.2 | g4885086    | translocation                       | DNA binding                            | 0.04175199 | 1.676147695 | DN |
| 211071_s_a |           |                  |             |                                     |                                        |            |             |    |
| t          | MLLT11    | chr1q21          | g13623686   | NA                                  | NA                                     | 0.01441052 | 1.673240149 | DN |
|            |           |                  |             |                                     | electron-transferring-flavoprotein     |            |             |    |
| 33494_at   | ETFDH     | chr4q32-q35      | 4839546_RC  | transport                           | dehydrogenase activity                 | 0.01104652 | 1.670430188 | DN |
| 221903_s_a |           |                  |             |                                     |                                        |            |             |    |
| t          | CYLD      | chr16q12.1       | Hs.18827.0  | translation                         | structural constituent of ribosome     | 1.73E-05   | 1.669861635 | DN |
| 201940_at  | CPD       | chr17q11.2       | Hs.5057.0   | proteolysis                         | carboxypeptidase activity              | 0.01414573 | 1.667953635 | DN |
| 202593_s_a |           |                  |             |                                     |                                        |            |             |    |
| t          | GDE1      | chr16p12-p11.2   | g7706616    | glycerol metabolic process          | phosphoric diester hydrolase activity  | 0.03732201 | 1.664990333 | DN |
| 206662_at  | GLRX      | chr5q14          | g4504024    | transport                           | electron carrier activity              | 0.00101787 | 1.664750047 | DN |
| 204824_at  | ENDOG     | chr9q34.1        | g4758269    | in utero embryonic development      | nucleic acid binding                   | 0.01145638 | 1.663930942 | DN |
| 204285_s_a |           |                  |             | release of cytochrome c from        |                                        |            |             |    |
| t          | PMAIP1    | chr18q21.32      | Hs.96.0     | mitochondria                        | protein binding                        | 0.00113959 | 1.66324499  | DN |
| 203339_at  | SLC25A12  | chr2q24          | Hs.179866.0 | transport                           | transporter activity                   | 0.01392445 | 1.659698662 | DN |
| 201467_s_a |           |                  |             |                                     | NAD(P)H dehydrogenase (quinone)        |            |             |    |
| t          | NQO1      | chr16q22.1       | Hs.80706.0  | xenobiotic metabolic process        | activity                               | 0.01549103 | 1.659648122 | DN |
| 57082_at   | LDLRAP1   | chr1p36-p35      | 4888623     | lipid metabolic process             | phosphotyrosine binding                | 0.01956795 | 1.659130432 | DN |

|            |          |                  |             |                                            |                                                |            |             |    |
|------------|----------|------------------|-------------|--------------------------------------------|------------------------------------------------|------------|-------------|----|
| 203337_x_a |          |                  |             |                                            |                                                |            |             |    |
| t          | ITGB1BP1 | chr2p25.2        | g4758577    | cell-matrix adhesion                       | protein binding                                | 7.37E-05   | 1.659044611 | DN |
| 221841_s_a |          |                  |             |                                            |                                                |            |             |    |
| t          | KLF4     | chr9q31          | Hs.7934.1   | transcription                              | nucleic acid binding                           | 0.01837385 | 1.656532141 | DN |
| 214769_at  | CLCN4    | chrXp22.3        | Hs.6932.0   | transport                                  | nucleotide binding                             | 0.00032634 | 1.654518227 | DN |
| 202531_at  | IRF1     | chr5q31.1        | g4504720    | transcription                              | DNA binding                                    | 0.00746001 | 1.65295152  | DN |
| 212014_x_a |          |                  |             |                                            |                                                |            |             |    |
| t          | CD44     | chr11p13         | Hs.169610.3 | regulation of cell growth                  | receptor activity                              | 0.01432552 | 1.651852474 | DN |
| 218949_s_a |          |                  |             |                                            |                                                |            |             |    |
| t          | QRSL1    | chr6q21          | g8922807    | translation                                | nucleotide binding                             | 0.01701469 | 1.650945914 | DN |
| 213050_at  | COBL     | chr7p12.1        | Hs.33010.0  | neural tube closure                        | protein binding                                | 0.00413678 | 1.648212834 | DN |
| 219377_at  | FAM59A   | chr18q12.1       | g12232414   | NA                                         | NA                                             | 0.00108615 | 1.647847494 | DN |
| 202074_s_a |          |                  |             |                                            |                                                |            |             |    |
| t          | OPTN     | chr10p13         | g11415041   | protein targeting to Golgi                 | protein binding                                | 0.00782713 | 1.643116222 | DN |
| 204566_at  | PPM1D    | chr17q23.2       | g4505996    | G2/M transition of mitotic cell cycle      | catalytic activity                             | 0.00903156 | 1.643074788 | DN |
| 210959_s_a |          |                  |             |                                            |                                                |            |             |    |
| t          | SRD5A1   | chr5p15          | g6523818    | lipid metabolic process                    | 3-oxo-5-alpha-steroid 4-dehydrogenase activity | 0.00383625 | 1.641886304 | DN |
| 204476_s_a |          |                  |             |                                            |                                                |            |             |    |
| t          | PC       | chr11q13.4-q13.5 | g11761614   | pyruvate metabolic process                 | nucleotide binding                             | 0.00141916 | 1.641783883 | DN |
| 218170_at  | ISOC1    | chr5q22.1-q33.3  | g7705613    | metabolic process                          | catalytic activity                             | 0.01613374 | 1.63921844  | DN |
| 205512_s_a |          |                  |             |                                            |                                                |            |             |    |
| t          | AIFM1    | chrXq26.1        | g4757731    | apoptotic nuclear change                   | DNA binding                                    | 0.00267392 | 1.636561357 | DN |
| 205309_at  | SMPDL3B  | chr1p35.3        | g7656907    | sphingomyelin catabolic process            | sphingomyelin phosphodiesterase activity       | 0.04312979 | 1.631062057 | DN |
| 202436_s_a |          |                  |             |                                            |                                                |            |             |    |
| t          | CYP1B1   | chr2p21          | Hs.154654.0 | metabolic process                          | monooxygenase activity                         | 0.04674095 | 1.630378323 | DN |
| 218780_at  | HOOK2    | chr19p13.2       | g7019410    | transport                                  | protein binding                                | 0.00011186 | 1.629897813 | DN |
| 206204_at  | GRB14    | chr2q22-q24      | g4758477    | signal transduction                        | receptor activity                              | 0.00186283 | 1.627978414 | DN |
| 218217_at  | SCPEP1   | chr17q22         | g11055991   | proteolysis                                | carboxypeptidase activity                      | 0.00072438 | 1.625896206 | DN |
| 203038_at  | PTPRK    | chr6q22.2-q22.3  | g4506316    | protein dephosphorylation                  | phosphoprotein phosphatase activity            | 0.0179708  | 1.622472974 | DN |
| 204385_at  | KYNU     | chr2q22.2        | g4504936    | tryptophan catabolic process               | catalytic activity                             | 0.00038549 | 1.622406155 | DN |
| 203041_s_a |          |                  |             |                                            |                                                |            |             |    |
| t          | LAMP2    | chrXq24          | g186929     | NA                                         | NA                                             | 0.00168239 | 1.621978958 | DN |
| 201627_s_a |          |                  |             |                                            |                                                |            |             |    |
| t          | INSIG1   | chr7q36          | g5031800    | lipid metabolic process                    | protein binding                                | 0.01969596 | 1.621895909 | DN |
| 204214_s_a |          |                  |             |                                            |                                                |            |             |    |
| t          | RAB32    | chr6q24.3        | g5803132    | small GTPase mediated signal transduction  | nucleotide binding                             | 0.02148708 | 1.621805687 | DN |
| 220225_at  | IRX4     | chr5p15.3        | g7705554    | regulation of transcription, DNA-dependent | DNA binding                                    | 0.00552083 | 1.62065641  | DN |
| 211549_s_a |          |                  |             |                                            |                                                |            |             |    |
| t          | HPGD     | chr4q34-q35      | g2047312    | lipid metabolic process                    | catalytic activity                             | 0.00146905 | 1.616705672 | DN |
| 200911_s_a |          |                  |             |                                            |                                                |            |             |    |
| t          | TACC1    | chr8p11.22       | g5454099    | microtubule cytoskeleton organization      | protein binding                                | 0.01401751 | 1.614520134 | DN |

|            |         |                  |             |                                                                    |                                                  |            |             |    |
|------------|---------|------------------|-------------|--------------------------------------------------------------------|--------------------------------------------------|------------|-------------|----|
| 206247_at  | MICB    | chr6p21.3        | g5174564    | immune response-activating cell surface receptor signaling pathway | natural killer cell lectin-like receptor binding | 0.03658741 | 1.614072013 | DN |
| 212875_s_a |         |                  |             |                                                                    |                                                  |            |             |    |
| t          | C2CD2   | chr21q22.3       | Hs.16007.0  | NA                                                                 | NA                                               | 7.45E-05   | 1.612857317 | DN |
| 202675_at  | SDHB    | chr1p36.1-p35    | g9257241    | tricarboxylic acid cycle                                           | protein binding                                  | 0.00808479 | 1.612826929 | DN |
| 219959_at  | MOCOS   | chr18q12         | g8923660    | Mo-molybdopterin cofactor biosynthetic process                     | catalytic activity                               | 0.03523082 | 1.611726155 | DN |
| 205109_s_a |         |                  |             |                                                                    | guanyl-nucleotide exchange factor activity       |            |             |    |
| t          | ARHGEF4 | chr2q22          | g9558722    | apoptosis                                                          | activity                                         | 0.02468125 | 1.610699641 | DN |
| 202073_at  | OPTN    | chr10p13         | Hs.278898.0 | protein targeting to Golgi                                         | protein binding                                  | 0.03567829 | 1.610212427 | DN |
| 221692_s_a |         |                  |             |                                                                    |                                                  |            |             |    |
| t          | MRPL34  | chr19p13.1       | g13559395   | translation                                                        | structural constituent of ribosome               | 0.00069893 | 1.609817666 | DN |
| 201920_at  | SLC20A1 | chr2q11-q14      | g7382462    | phosphate metabolic process                                        | signal transducer activity                       | 0.04191032 | 1.604566744 | DN |
| 208928_at  | POR     | chr7q11.2        | g9964002    | positive regulation of monooxygenase activity                      | NADPH-hemoprotein reductase activity             | 0.02632073 | 1.604009789 | DN |
| 202323_s_a |         |                  |             |                                                                    |                                                  |            |             |    |
| t          | ACBD3   | chr1q42.12       | Hs.6831.0   | steroid biosynthetic process                                       | acyl-CoA binding                                 | 0.04566001 | 1.603669524 | DN |
| 213696_s_a |         |                  |             |                                                                    |                                                  |            |             |    |
| t          | MED8    | chr1p34.2        | Hs.301756.2 | transcription                                                      | NA                                               | 0.02111172 | 1.603292745 | DN |
| 221552_at  | ABHD6   | chr3p14.3        | g12804562   | NA                                                                 | catalytic activity                               | 0.00325797 | 1.602849773 | DN |
| 204490_s_a |         |                  |             |                                                                    |                                                  |            |             |    |
| t          | CD44    | chr11p13         | g180196     | regulation of cell growth                                          | receptor activity                                | 0.00784711 | 1.602276754 | DN |
| 202948_at  | IL1R1   | chr2q12          | g4504658    | immune response                                                    | signal transducer activity                       | 0.00576616 | 1.600807454 | DN |
| 218989_x_a |         |                  |             |                                                                    | zinc ion transmembrane transporter activity      |            |             |    |
| t          | SLC30A5 | chr5q12.1        | g12597642   | transport                                                          | activity                                         | 0.03297562 | 1.600103961 | DN |
| 57715_at   | CALHM2  | chr10pter-q26.12 | 4905541     | NA                                                                 | NA                                               | 0.00966101 | 1.599732159 | DN |
| 219284_at  | HSPBAP1 | chr3q21.1        | g13375820   | response to stress                                                 | NA                                               | 0.02162448 | 1.597739111 | DN |
| 218772_x_a |         |                  |             |                                                                    |                                                  |            |             |    |
| t          | TMEM38B | chr9q31.2        | g8922460    | transport                                                          | ion channel activity                             | 0.02792664 | 1.597737805 | DN |
| 222108_at  | AMIGO2  | chr12q13.11      | Hs.121520.0 | anti-apoptosis                                                     | protein binding                                  | 0.02168422 | 1.596779403 | DN |
| 209514_s_a |         |                  |             |                                                                    |                                                  |            |             |    |
| t          | RAB27A  | chr15q15-q21.1   | Hs.50477.1  | protein targeting                                                  | nucleotide binding                               | 0.00709178 | 1.596104963 | DN |
| 209189_at  | FOS     | chr14q24.3       | g13325363   | conditioned taste aversion                                         | DNA binding                                      | 0.0148723  | 1.594456271 | DN |
| 209018_s_a |         |                  |             |                                                                    |                                                  |            |             |    |
| t          | PINK1   | chr1p36          | Hs.6163.0   | protein phosphorylation                                            | nucleotide binding                               | 0.00289827 | 1.590838719 | DN |
| 202146_at  | IFRD1   | chr7q31.1        | Hs.7879.0   | multicellular organismal development                               | binding                                          | 0.00576115 | 1.589801864 | DN |
| 208962_s_a |         |                  |             |                                                                    |                                                  |            |             |    |
| t          | FADS1   | chr11q12.2-q13.1 | Hs.132898.0 | lipid metabolic process                                            | C-5 sterol desaturase activity                   | 0.00072081 | 1.588704366 | DN |
| 203252_at  | CDK2AP2 | chr11q13         | g5031668    | NA                                                                 | kinase activity                                  | 0.0011592  | 1.587948891 | DN |
| 200924_s_a |         |                  |             |                                                                    |                                                  |            |             |    |
| t          | SLC3A2  | chr11q13         | g4505140    | carbohydrate metabolic process                                     | catalytic activity                               | 0.00878704 | 1.584747068 | DN |
| 214175_x_a |         |                  |             |                                                                    |                                                  |            |             |    |
| t          | PDLIM4  | chr5q31.1        | Hs.79691.2  | NA                                                                 | protein binding                                  | 0.00284931 | 1.582005367 | DN |

|            |         |                  |             |                                                         |                                                                       |            |             |    |
|------------|---------|------------------|-------------|---------------------------------------------------------|-----------------------------------------------------------------------|------------|-------------|----|
| 206707_x_a |         |                  |             | multicellular organismal                                |                                                                       |            |             |    |
| t          | FAM65B  | chr6p22.3-p21.32 | g7705341    | development                                             | binding                                                               | 0.03404243 | 1.580704649 | DN |
| 203786_s_a |         |                  |             |                                                         |                                                                       |            |             |    |
| t          | TPD52L1 | chr6q22-q23      | g4507640    | G2/M transition of mitotic cell cycle                   | protein binding                                                       | 0.01440376 | 1.580491499 | DN |
| 212788_x_a |         |                  |             |                                                         |                                                                       |            |             |    |
| t          | FTL     | chr19q13.33      | Hs.111334.1 | iron ion transport                                      | binding<br>inositol or phosphatidylinositol                           | 0.00225466 | 1.578440694 | DN |
| 202797_at  | SACM1L  | chr3p21.3        | g7662337    | phosphoinositide dephosphorylation                      | phosphatase activity                                                  | 0.0147471  | 1.577499143 | DN |
| 204262_s_a |         |                  |             |                                                         |                                                                       |            |             |    |
| t          | PSEN2   | chr1q31-q42      | g4506164    | response to hypoxia                                     | endopeptidase activity                                                | 0.0177911  | 1.576948827 | DN |
| 202218_s_a |         |                  |             |                                                         |                                                                       |            |             |    |
| t          | FADS2   | chr11q12.2       | g4758333    | lipid metabolic process                                 | stearoyl-CoA 9-desaturase activity<br>NAD(P)H dehydrogenase (quinone) | 0.00197952 | 1.575738573 | DN |
| 210519_s_a |         |                  |             |                                                         |                                                                       |            |             |    |
| t          | NQO1    | chr16q22.1       | g12654176   | xenobiotic metabolic process                            | activity                                                              | 0.00704081 | 1.574747691 | DN |
| 38241_at   | BTN3A3  | chr6p21.3        | 4853366     | NA                                                      | NA                                                                    | 0.00669323 | 1.574121436 | DN |
| 219922_s_a |         |                  |             |                                                         |                                                                       |            |             |    |
| t          | LTBP3   | chr11q13.1       | g10835104   | skeletal system development                             | binding<br>guanyl-nucleotide exchange factor                          | 0.00385693 | 1.572963376 | DN |
| 212895_s_a |         |                  |             |                                                         |                                                                       |            |             |    |
| t          | ABR     | chr17p13.3       | Hs.118021.2 | apoptosis                                               | activity                                                              | 0.01027722 | 1.572596776 | DN |
| 203039_s_a |         |                  |             |                                                         |                                                                       |            |             |    |
| t          | NDUFS1  | chr2q33-q34      | g4826855    | mitochondrial electron transport,<br>NADH to ubiquinone | NADH dehydrogenase activity                                           | 0.04782466 | 1.570416229 | DN |
| 205768_s_a |         |                  |             |                                                         |                                                                       |            |             |    |
| t          | SLC27A2 | chr15q21.2       | g4503652    | very long-chain fatty acid metabolic<br>process         | nucleotide binding                                                    | 0.0109929  | 1.566931638 | DN |
| 221654_s_a |         |                  |             |                                                         |                                                                       |            |             |    |
| t          | USP3    | chr15q22.3       | g4689127    | mitotic cell cycle                                      | ubiquitin thiolesterase activity                                      | 0.04996582 | 1.562373376 | DN |
| 210793_s_a |         |                  |             |                                                         |                                                                       |            |             |    |
| t          | NUP98   | chr11p15.5       | g1184172    | protein import into nucleus, docking                    | transporter activity                                                  | 0.00761774 | 1.561916785 | DN |
| 210418_s_a |         |                  |             |                                                         |                                                                       |            |             |    |
| t          | IDH3B   | chr20p13         | g4103445    | tricarboxylic acid cycle                                | magnesium ion binding                                                 | 0.00511043 | 1.559567147 | DN |
| 215726_s_a |         |                  |             |                                                         |                                                                       |            |             |    |
| t          | CYB5A   | chr18q23         | Hs.83834.2  | transport                                               | aldo-keto reductase activity                                          | 0.00728119 | 1.558957232 | DN |
| 201502_s_a |         |                  |             |                                                         |                                                                       |            |             |    |
| t          | NFKBIA  | chr14q13         | Hs.81328.0  | protein import into nucleus,<br>translocation           | protein binding                                                       | 0.02425931 | 1.558089701 | DN |
| 216080_s_a |         |                  |             |                                                         |                                                                       |            |             |    |
| t          | FADS3   | chr11q12-q13.1   | Hs.21765.1  | lipid metabolic process                                 | iron ion binding                                                      | 0.01136909 | 1.557631324 | DN |
| 201818_at  | LPCAT1  | chr5p15.33       | g13376233   | metabolic process                                       | calcium ion binding                                                   | 0.00843787 | 1.55707746  | DN |
| 206561_s_a |         |                  |             |                                                         |                                                                       |            |             |    |
| t          | AKR1B10 | chr7q33          | g13346507   | cellular aldehyde metabolic process                     | aldo-keto reductase activity<br>extracellular matrix structural       | 0.00049763 | 1.557064055 | DN |
| 203184_at  | FBN2    | chr5q23-q31      | g4755135    | anatomical structure morphogenesis                      | constituent                                                           | 0.0115237  | 1.553782967 | DN |
| 218692_at  | SYBU    | chr8q23.2        | g8923340    | NA                                                      | NA                                                                    | 0.00759028 | 1.553382557 | DN |
| 202976_s_a |         |                  |             |                                                         |                                                                       |            |             |    |
| t          | RHOBTB3 | chr5q15          | g7662355    | transport                                               | nucleotide binding                                                    | 0.02197306 | 1.551830748 | DN |
| 212510_at  | GPD1L   | chr3p22.3        | Hs.82432.0  | carbohydrate metabolic process                          | catalytic activity                                                    | 0.00157267 | 1.551386406 | DN |

|            |          |                 |             |                                    |                                         |            |             |    |
|------------|----------|-----------------|-------------|------------------------------------|-----------------------------------------|------------|-------------|----|
| 212276_at  | LPIN1    | chr2p25.1       | Hs.81412.0  | transcription                      | transcription coactivator activity      | 0.02391691 | 1.551366458 | DN |
| 210868_s_a |          |                 |             |                                    | transferase activity, transferring acyl |            |             |    |
| t          | ELOVL6   | chr4q25         | g12654918   | fatty acid biosynthetic process    | groups other than amino-acyl groups     | 0.00704707 | 1.551235749 | DN |
| 209139_s_a |          |                 |             |                                    |                                         |            |             |    |
| t          | PRKRA    | chr2q31.2       | g4927415    | protein phosphorylation            | RNA binding                             | 0.03172408 | 1.550964512 | DN |
| 206074_s_a |          |                 |             | DNA unwinding involved in          |                                         |            |             |    |
| t          | HMGA1    | chr6p21         | g4504432    | replication                        | DNA binding                             | 0.01575496 | 1.550137156 | DN |
| 200999_s_a |          |                 |             |                                    |                                         |            |             |    |
| t          | CKAP4    | chr12q23.3      | g5803112    | NA                                 | NA                                      | 0.04757418 | 1.549447053 | DN |
| 209307_at  | SWAP70   | chr11p15        | Hs.153026.0 | somatic cell DNA recombination     | DNA binding                             | 2.22E-05   | 1.548583841 | DN |
|            |          |                 |             |                                    | sequence-specific DNA binding           |            |             |    |
| 218225_at  | ECSIT    | chr19p13.2      | g7706114    | mesoderm formation                 | transcription factor activity           | 0.01081702 | 1.548462486 | DN |
| 218018_at  | PDXK     | chr21q22.3      | Hs.4746.0   | cell proliferation                 | nucleotide binding                      | 0.03262781 | 1.547987902 | DN |
| 202084_s_a |          |                 |             |                                    |                                         |            |             |    |
| t          | SEC14L1  | chr17q25.2      | g4506866    | NA                                 | binding                                 | 0.00764871 | 1.547574721 | DN |
| 209750_at  | NR1D2    | chr3p24.2       | Hs.37288.0  | transcription                      | DNA binding                             | 3.91E-05   | 1.547178665 | DN |
| 204215_at  | C7orf23  | chr7q21.1-q21.2 | g13236556   | NA                                 | NA                                      | 0.0094504  | 1.547082463 | DN |
| 210754_s_a |          |                 |             |                                    |                                         |            |             |    |
| t          | LYN      | chr8q13         | g187270     | protein phosphorylation            | nucleotide binding                      | 0.00716825 | 1.546798114 | DN |
| 215243_s_a |          |                 |             |                                    |                                         |            |             |    |
| t          | GJB3     | chr1p34         | Hs.98485.1  | in utero embryonic development     | gap junction channel activity           | 0.03617682 | 1.546410191 | DN |
| 221020_s_a |          |                 |             |                                    |                                         |            |             |    |
| t          | SLC25A32 | chr8q22.3       | g13540550   | transport                          | transporter activity                    | 0.00117278 | 1.544298157 | DN |
| 222173_s_a |          |                 |             |                                    |                                         |            |             |    |
| t          | TBC1D2   | chr9q22.33      | Hs.135917.4 | regulation of Rab GTPase activity  | GTPase activator activity               | 0.01941633 | 1.544294854 | DN |
| 202431_s_a |          |                 |             | branching involved in ureteric bud |                                         |            |             |    |
| t          | MYC      | chr8q24.21      | g12962934   | morphogenesis                      | DNA binding                             | 0.01340044 | 1.543868717 | DN |
| 217118_s_a |          |                 |             |                                    |                                         |            |             |    |
| t          | C22orf9  | chr22q13.31     | Hs.13255.1  | NA                                 | protein binding                         | 0.03712164 | 1.543747825 | DN |
| 209409_at  | GRB10    | chr7p12.2       | g1503997    | signal transduction                | receptor activity                       | 0.04802699 | 1.543208302 | DN |
| 219305_x_a |          |                 |             |                                    |                                         |            |             |    |
| t          | FBXO2    | chr1p36.22      | g6912363    | protein modification process       | beta-amyloid binding                    | 0.03160139 | 1.542533124 | DN |
| 206157_at  | PTX3     | chr3q25         | g4506332    | response to yeast                  | zymosan binding                         | 4.87E-06   | 1.540798935 | DN |
|            |          |                 |             |                                    | inositol or phosphatidylinositol        |            |             |    |
| 202794_at  | INPP1    | chr2q32         | g4755138    | phosphate metabolic process        | phosphatase activity                    | 0.01958947 | 1.540371456 | DN |
| 202085_at  | TJP2     | chr9q13-q21     | g4759341    | response to organic substance      | guanylate kinase activity               | 0.03048064 | 1.538895804 | DN |
| 222203_s_a |          |                 |             |                                    |                                         |            |             |    |
| t          | RDH14    | chr2p24.2       | Hs.288880.1 | metabolic process                  | catalytic activity                      | 0.01302546 | 1.53836464  | DN |
| 210026_s_a |          |                 |             |                                    |                                         |            |             |    |
| t          | CARD10   | chr22q13.1      | g13488606   | protein complex assembly           | protein binding                         | 0.01402326 | 1.536835451 | DN |
| 219041_s_a |          |                 |             |                                    |                                         |            |             |    |
| t          | REPIN1   | chr7q36.1       | g7656889    | DNA replication                    | nucleic acid binding                    | 0.01841314 | 1.536649833 | DN |
| 202491_s_a |          |                 |             |                                    |                                         |            |             |    |
| t          | IKBKAP   | chr9q31         | g4504628    | transcription                      | DNA binding                             | 0.01406901 | 1.536636873 | DN |

|                 |         |                 |             |                                                                                                                            |                                                                                      |            |             |    |
|-----------------|---------|-----------------|-------------|----------------------------------------------------------------------------------------------------------------------------|--------------------------------------------------------------------------------------|------------|-------------|----|
| 207357_s_a<br>t | GALNT10 | chr5q33.2       | g9055207    | protein O-linked glycosylation                                                                                             | polypeptide N-acetylgalactosaminyltransferase activity                               | 0.03659124 | 1.536606623 | DN |
| 208918_s_a<br>t | NADK    | chr1p36.33      | Hs.220324.2 | metabolic process                                                                                                          | nucleotide binding                                                                   | 0.00737721 | 1.534740886 | DN |
| 214527_s_a<br>t | PQBP1   | chrXp11.23      | Hs.30570.4  | transcription                                                                                                              | DNA binding<br>serine-type endopeptidase inhibitor activity                          | 0.01707822 | 1.533157528 | DN |
| 202826_at       | SPINT1  | chr15q15.1      | g4504328    | embryonic placenta development                                                                                             |                                                                                      | 0.01320876 | 1.532327112 | DN |
| 202802_at       | DHPS    | chr19p13        | g7108341    | translation                                                                                                                | protein binding                                                                      | 0.00554293 | 1.531868568 | DN |
| 202375_at       | SEC24D  | chr4q26         | g7662658    | transport                                                                                                                  | protein binding                                                                      | 0.00792765 | 1.531748816 | DN |
| 204257_at       | FADS3   | chr11q12-q13.1  | g13375615   | lipid metabolic process<br>ubiquitin-dependent protein                                                                     | iron ion binding                                                                     | 0.00474087 | 1.53126336  | DN |
| 209943_at       | FBXL4   | chr6q16.1-q16.3 | g6103636    | catabolic process                                                                                                          | NA                                                                                   | 0.00052202 | 1.528595571 | DN |
| 214214_s_a<br>t | C1QBP   | chr17p13.3      | Hs.78614.3  | immune response                                                                                                            | complement component C1q binding                                                     | 0.0013571  | 1.527623316 | DN |
| 204679_at       | KCNK1   | chr1q42-q43     | g4504846    | transport                                                                                                                  | ion channel activity                                                                 | 0.00087186 | 1.526146102 | DN |
| 201538_s_a<br>t | DUSP3   | chr17q21        | g4758207    | inactivation of MAPK activity                                                                                              | phosphoprotein phosphatase activity                                                  | 0.00552865 | 1.525199246 | DN |
| 201795_at       | LBR     | chr1q42.1       | g4504960    | NA                                                                                                                         | nucleic acid binding                                                                 | 0.03420201 | 1.524895721 | DN |
| 208510_s_a<br>t | PPARG   | chr3p25         | g7705548    | negative regulation of transcription<br>from RNA polymerase II promoter                                                    | DNA binding                                                                          | 0.01223094 | 1.524731708 | DN |
| 202275_at       | G6PD    | chrXq28         | g4503844    | cytokine production                                                                                                        | catalytic activity                                                                   | 0.01274762 | 1.523544061 | DN |
| 203125_x_a<br>t | SLC11A2 | chr12q13        | g3170363    | transition metal ion transport                                                                                             | transporter activity                                                                 | 0.01983646 | 1.523519775 | DN |
| 212445_s_a<br>t | NEDD4L  | chr18q21        | Hs.12017.1  | protein modification process<br>regulation of transcription, DNA-dependent                                                 | ubiquitin-protein ligase activity<br>RNA polymerase II transcription factor activity | 0.01603652 | 1.523501863 | DN |
| 201200_at       | CREG1   | chr1q24         | g4503036    |                                                                                                                            |                                                                                      | 0.00992522 | 1.522609046 | DN |
| 204836_at       | GLDC    | chr9p22         | g4504012    | cellular amino acid metabolic process<br>negative regulation of transcription                                              | catalytic activity                                                                   | 0.0457235  | 1.522328323 | DN |
| 212774_at       | ZNF238  | chr1q44-qter    | Hs.69997.1  | from RNA polymerase II promoter<br>antigen processing and presentation<br>of exogenous peptide antigen via<br>MHC class II | nucleic acid binding                                                                 | 0.04777929 | 1.521963923 | DN |
| 201422_at       | IFI30   | chr19p13.1      | g5453695    |                                                                                                                            | oxidoreductase activity                                                              | 0.01740561 | 1.521262104 | DN |
| 202931_x_a<br>t | BIN1    | chr2q14         | g4757747    | endocytosis                                                                                                                | protein binding                                                                      | 0.0342608  | 1.521225159 | DN |
| 211715_s_a<br>t | BDH1    | chr3q29         | g13543366   | metabolic process                                                                                                          | catalytic activity                                                                   | 0.02461105 | 1.521145119 | DN |
| 221679_s_a<br>t | ABHD6   | chr3p14.3       | g9963838    | NA<br>RNA splicing, via transesterification<br>reactions                                                                   | catalytic activity                                                                   | 0.00263233 | 1.518405345 | DN |
| 200071_at       | SMNDC1  | chr10q23        | Hs.79968.0  |                                                                                                                            | nucleic acid binding                                                                 | 0.01959107 | 1.517263359 | DN |

|             |            |                  |             |                                                                    |                                                                       |            |             |    |
|-------------|------------|------------------|-------------|--------------------------------------------------------------------|-----------------------------------------------------------------------|------------|-------------|----|
| 203045_at   | NINJ1      | chr9q22          | g4758809    | cell adhesion                                                      | NA                                                                    | 0.04158461 | 1.517145906 | DN |
| 205219_s_at | GALK2      | chr15q21.1-q21.2 | g4503896    | carbohydrate metabolic process                                     | nucleotide binding<br>calcium activated cation channel activity       | 0.04016164 | 1.516749159 | DN |
| 218375_at   | NUDT9      | chr4q22.1        | g13129009   | cation transport                                                   | activity                                                              | 0.00753944 | 1.516628845 | DN |
| 219639_x_at | PARP6      | chr15q23         | g9910373    | NA                                                                 | NAD+ ADP-ribosyltransferase activity                                  | 0.01255366 | 1.515585762 | DN |
| 221571_at   | TRAF3      | chr14q32.32      | Hs.297660.1 | regulation of cytokine production                                  | ubiquitin-protein ligase activity                                     | 0.02780444 | 1.515364861 | DN |
| 205171_at   | PTPN4      | chr2q14.2        | g4506294    | protein dephosphorylation                                          | phosphoprotein phosphatase activity                                   | 0.01746427 | 1.515341177 | DN |
| 218093_s_at | ANKRD10    | chr13q34         | g8923103    | NA                                                                 | NA                                                                    | 0.0370273  | 1.511746628 | DN |
| 214746_s_at | ZNF467     | chr7q36.1        | Hs.112158.1 | transcription                                                      | nucleic acid binding                                                  | 0.04268511 | 1.51038572  | DN |
| 214437_s_at | SHMT2      | chr12q12-q14     | Hs.75069.0  | glycine metabolic process                                          | catalytic activity                                                    | 0.04810032 | 1.509800421 | DN |
| 221551_x_at | ST6GALNAC4 | chr9q34          | g6468226    | protein glycosylation                                              | sialyltransferase activity                                            | 0.0213769  | 1.508487295 | DN |
| 209075_s_at | ISCU       | chr12q24.1       | g11545706   | nitrogen fixation                                                  | iron ion binding                                                      | 0.00073118 | 1.506841619 | DN |
| 202003_s_at | ACAA2      | chr18q21.1       | g5174428    | lipid metabolic process<br>post-translational protein modification | catalytic activity                                                    | 0.02147958 | 1.506386568 | DN |
| 217823_s_at | UBE2J1     | chr6q15          | Hs.184325.0 | modification                                                       | nucleotide binding<br>platelet-derived growth factor receptor binding | 0.00758218 | 1.504529225 | DN |
| 205463_s_at | PDGFA      | chr7p22          | g4505678    | angiogenesis                                                       | binding                                                               | 0.0031217  | 1.502882746 | DN |
| 31845_at    | ELF4       | chrXq26          | 4863928     | natural killer cell proliferation                                  | DNA binding                                                           | 0.02881319 | 1.501480459 | DN |
| 210986_s_at | TPM1       | chr15q22.1       | g854188     | in utero embryonic development                                     | actin binding                                                         | 0.02176398 | 1.50008469  | DN |

**Suppl. Table 3: Genes and pathways representing differences between proliferating cells in 2D and 3D.**

| Total number of differentially expressed genes: 2126 |                              |                     |           |            |                                                                                                                                                                                                                                                                                                                                           |
|------------------------------------------------------|------------------------------|---------------------|-----------|------------|-------------------------------------------------------------------------------------------------------------------------------------------------------------------------------------------------------------------------------------------------------------------------------------------------------------------------------------------|
| Pathway                                              | Number Of Protein In Pathway | Protein From Sample | P-Value   | FDR        | IDs                                                                                                                                                                                                                                                                                                                                       |
| M Phase(R)                                           | 88                           | 46                  | 9.981e-14 | <1.000e-03 | [AURKB, BIRC5, BUB1, BUB1B, BUB3, CCDC99, CDC20, CDCA8, CENPA, CENPC1, CENPE, CENPF, CENPI, CENPM, CENPN, CLASP2, FBXO5, KIF18A, KIF20A, KIF23, KIF2A, KIF2C, KNTC1, MAD2L1, MAPRE1, MIS12, MLF1IP, NDC80, NUDC, NUP107, NUP43, NUP85, NUP98, PAFAH1B1, PLK1, RAD21, RANBP2, SKA1, SMC1A, SMC3, SPC25, STAG1, STAG2, XPO1, ZWILCH, ZWINT] |
| G1/S Transition(R)                                   | 98                           | 45                  | 1.330e-11 | <5.000e-04 | [CCNB1, CCNE1, CCNE2, CDC25A, CDC6, CDC7, CDK2, CKS1B, DBF4, DHFR, E2F3, FBXO5, MCM10, MCM2, MCM3, MCM4, MCM5, MCM6, MCM7, PCNA, POLA1, POLA2, POLE2, PRIM1, PSMA3, PSMA4, PSMB10, PSMB4, PSMB8, PSMB9, PSMC2, PSMC3, PSMD1, PSMD11, PSMD12, PSMD14, PSMD4, PSME1, PSME3, PSMF1, RRM2, SKP1, TFDP1, TYMS, WEE1]                           |
| DNA Replication(R)                                   | 95                           | 44                  | 1.717e-11 | <3.333e-04 | [CDC6, CDC7, CDK2, DBF4, E2F3, FEN1, GINS1, GINS2, GINS4, GMNN, MCM10, MCM2, MCM3, MCM4, MCM5, MCM6, MCM7, PCNA, POLA1, POLA2, POLD3, POLD4, POLE2, PRIM1, PSMA3, PSMA4, PSMB10, PSMB4, PSMB8, PSMB9, PSMC2, PSMC3, PSMD1, PSMD11, PSMD12, PSMD14, PSMD4, PSME1, PSME3, PSMF1, RFC2, RFC3, RFC4, RFC5]                                    |
| S Phase(R)                                           | 97                           | 44                  | 3.302e-11 | <2.500e-04 | [CCND1, CDC25A, CDC6, CDK2, CKS1B, FEN1, GINS1, GINS2, GINS4, MCM2, MCM3, MCM4, MCM5, MCM6, MCM7, PCNA, POLA1, POLA2, POLD3, POLD4, POLE2, PRIM1, PSMA3, PSMA4, PSMB10, PSMB4, PSMB8, PSMB9, PSMC2, PSMC3, PSMD1, PSMD11, PSMD12, PSMD14, PSMD4, PSME1, PSME3, PSMF1, RFC2, RFC3, RFC4, RFC5, SKP1,                                       |



|                                                      |     |    |           |            |                                                                                                                                                                                                                                                                                                                                                                                                    |
|------------------------------------------------------|-----|----|-----------|------------|----------------------------------------------------------------------------------------------------------------------------------------------------------------------------------------------------------------------------------------------------------------------------------------------------------------------------------------------------------------------------------------------------|
|                                                      |     |    |           |            | WEE1]                                                                                                                                                                                                                                                                                                                                                                                              |
| Cell Cycle Checkpoints(R)                            | 108 | 46 | 8.934e-11 | <2.000e-04 | [ATR, BUB1B, BUB3, CCNB1, CCNB2, CDC20, CDC25A, CDC25C, CDC27, CDC6, CDC7, CDK2, CHEK1, DBF4, MAD2L1, MCM10, MCM2, MCM3, MCM4, MCM5, MCM6, MCM7, PSMA3, PSMA4, PSMB10, PSMB4, PSMB8, PSMB9, PSMC2, PSMC3, PSMD1, PSMD11, PSMD12, PSMD14, PSMD4, PSME1, PSME3, PSMF1, RAD1, RAD17, RFC2, RFC3, RFC4, RFC5, UBE2C, WEE1]                                                                             |
| Cell cycle(K)                                        | 112 | 43 | 7.526e-09 | <1.667e-04 | [ATR, BUB1, BUB1B, BUB3, CCNA2, CCNB1, CCNB2, CCND1, CCND2, CCNE1, CCNE2, CDC20, CDC25A, CDC25C, CDC27, CDC6, CDC7, CDK2, CDKN1C, CHEK1, DBF4, E2F3, ESPL1, MAD2L1, MCM2, MCM3, MCM4, MCM5, MCM6, MCM7, PCNA, PKMYT1, PLK1, PRKDC, PTTG1, SKP1, SKP2, SMC1A, TFDP1, TGFB1, WEE1, YWHAH]                                                                                                            |
| APC/C-mediated degradation of cell cycle proteins(R) | 72  | 30 | 2.661e-07 | <1.429e-04 | [AURKA, AURKB, BUB1B, BUB3, CCNB1, CDC20, CDC27, CDK2, FBXO5, MAD2L1, PLK1, PSMA3, PSMA4, PSMB10, PSMB4, PSMB8, PSMB9, PSMC2, PSMC3, PSMD1, PSMD11, PSMD12, PSMD14, PSMD4, PSME1, PSME3, PSMF1, PTTG1, SKP1, UBE2C]                                                                                                                                                                                |
| Aurora B signaling(N)                                | 39  | 21 | 3.220e-07 | <1.250e-04 | [AURKA, AURKB, BIRC5, BUB1, CBX5, CDCA8, CENPA, KIF20A, KIF23, KIF2C, NCAPD2, NCAPG, NCAPH, NDC80, PSMA3, RACGAP1, RASA1, SMC2, SMC4, STMN1, TACC1]                                                                                                                                                                                                                                                |
| Influenza Life Cycle(R)                              | 187 | 53 | 2.066e-06 | <1.111e-04 | [CLTA, FUS, GRSF1, GTF2F1, HNRNPA2B1, HNRNPA3, HNRNPD, HNRNPM, HNRNPR, HNRNPU, HSP90AA1, IPO5, KPNB1, NCBP1, NUP107, NUP153, NUP155, NUP205, NUP43, NUP50, NUP62, NUP85, NUP88, NUP98, POLR2K, PTBP1, RANBP2, RBMX, RPL10, RPL14, RPL15, RPL17, RPL18A, RPL28, RPL29, RPL31, RPL36, RPL37A, RPS16, RPS17, RPS21, RPS4X, RPS9, SMC1A, SNRNP70, SNRPD1, SNRPF, SNRPG, SRRM1, TPR, U2AF1, XPO1, YBX1] |
| M/G1 Transition(R)                                   | 61  | 25 | 3.429e-06 | <1.000e-04 | [CDC6, E2F3, GMNN, MCM2, MCM3, MCM4, MCM5, MCM6, MCM7, PSMA3, PSMA4, PSMB10, PSMB4, PSMB8, PSMB9, PSMC2, PSMC3, PSMD1, PSMD11, PSMD12, PSMD14, PSMD4, PSME1, PSME3, PSMF1]                                                                                                                                                                                                                         |
| Host Interactions of HIV factors(R)                  | 119 | 38 | 4.445e-06 | <9.091e-05 | [CUL5, HLA-A, KPNB1, NUP107, NUP153, NUP155, NUP205, NUP43, NUP50, NUP62, NUP85, NUP88, NUP98, PAK2, PSIP1, PSMA3, PSMA4, PSMB10, PSMB4, PSMB8, PSMB9, PSMC2, PSMC3, PSMD1, PSMD11, PSMD12, PSMD14, PSMD4, PSME1, PSME3, PSMF1, RANBP1, RANBP2, SKP1,                                                                                                                                              |

|                                                         |     |    |           |           |                                                                                                                                                                                                                                                                                                   |
|---------------------------------------------------------|-----|----|-----------|-----------|---------------------------------------------------------------------------------------------------------------------------------------------------------------------------------------------------------------------------------------------------------------------------------------------------|
|                                                         |     |    |           |           | SLC25A6, TCEB2, TPR, XPO1]                                                                                                                                                                                                                                                                        |
| Signaling by Aurora kinases(N)                          | 94  | 31 | 1.822e-05 | 1.667e-04 | [AURKA, AURKB, BIRC2, BIRC5, BUB1, CBX5, CDCA8, CENPA, DLGAP5, KIF20A, KIF23, KIF2C, MALT1, NCAPD2, NCAPG, NCAPH, NDC80, NFKB2, PIK3CA, PSMA3, RACGAP1, RASA1, RELB, SMC2, SMC4, STMN1, TACC1, TACC3, TNFAIP3, TPX2, XPO1]                                                                        |
| eukaryotic protein translation(B)                       | 13  | 10 | 2.171e-05 | 2.308e-04 | [EIF2S1, EIF2S2, EIF4A1, EIF4A2, EIF4E, EIF4G1, EIF4G2, EIF4G3, EIF5, EIF5B]                                                                                                                                                                                                                      |
| BARD1 signaling events(N)                               | 29  | 15 | 2.376e-05 | 2.143e-04 | [ATR, BARD1, CCNE1, CDK2, FANCA, FANCE, FANCL, MRE11A, NBN, PCNA, PRKDC, RAD50, RAD51, RBBP8, TOPBP1]                                                                                                                                                                                             |
| FOXO1 transcription factor network(N)                   | 38  | 17 | 4.252e-05 | 2.667e-04 | [AURKB, BIRC5, BRCA2, CCNB1, CCNB2, CCND1, CCNE1, CDK2, CENPA, CENPF, CKS1B, ETV5, FOS, FOXO1, NEK2, PLK1, SKP2]                                                                                                                                                                                  |
| G2/M Transition(R)                                      | 81  | 27 | 5.190e-05 | 3.125e-04 | [AKAP9, CCNA2, CCNB1, CCNB2, CDC25A, CDC25C, CEP135, CEP76, CSNK1D, DCTN2, FGFR1OP, HSP90AA1, MAPRE1, NEK2, PAFAH1B1, PCNT, PKMYT1, PLK1, PLK4, TUBA4A, TUBB, TUBB2C, TUBG1, TUBGCP3, WEE1, XPO1, YWHAE]                                                                                          |
| Signaling by Wnt(R)                                     | 50  | 19 | 1.299e-04 | 7.647e-04 | [APC, CSNK1A1, PSMA3, PSMA4, PSMB10, PSMB4, PSMB8, PSMB9, PSMC2, PSMC3, PSDM1, PSDM11, PSDM12, PSDM14, PSDM4, PSME1, PSME3, PSMF1, SKP1]                                                                                                                                                          |
| Transport of Mature Transcript to Cytoplasm(R)          | 55  | 20 | 1.553e-04 | 1.000e-03 | [CPSF1, EIF4E, MAGOH, NCBP1, NUP107, NUP153, NUP155, NUP205, NUP43, NUP50, NUP62, NUP85, NUP88, NUP98, RANBP2, RBM8A, SRRM1, TPR, U2AF1, UPF3B]                                                                                                                                                   |
| role of brca1 brca2 and atr in cancer susceptibility(B) | 20  | 11 | 1.671e-04 | 1.000e-03 | [ATR, BRCA2, FANCA, FANCE, MAPK3, MRE11A, NBN, RAD1, RAD17, RAD50, RAD51]                                                                                                                                                                                                                         |
| Apoptosis(R)                                            | 124 | 34 | 2.509e-04 | 1.700e-03 | [APC, BBC3, BIRC2, CASP9, CYCS, FAS, FNTA, GSN, KPNB1, LMNA, LMNB1, MST4, PAK2, PMAIP1, PPP3CC, PSMA3, PSMA4, PSMB10, PSMB4, PSMB8, PSMB9, PSMC2, PSMC3, PSDM1, PSDM11, PSDM12, PSDM14, PSDM4, PSME1, PSME3, PSMF1, ROCK1, TFDP1, TJP1]                                                           |
| Formation and Maturation of mRNA Transcript(R)          | 152 | 39 | 3.364e-04 | 2.619e-03 | [CPSF1, CPSF7, FUS, GTF2F1, HNRNPA2B1, HNRNPA3, HNRNPD, HNRNPM, HNRNPR, HNRNPU, MAGOH, METTL3, NCBP1, PAPOLA, POLR2K, PTBP1, RBM8A, RBMX, RNGTT, SF3B1, SF3B3, SMC1A, SNRNP70, SNRPA1, SNRPD1, SNRPF, SNRPG, SRRM1, SUPT16H, SUPT4H1, TAF10, TAF12, TAF5, TAF9, TCEB2, TCEB3, U2AF1, UPF3B, YBX1] |
| Telomere                                                | 30  | 13 | 4.388e-04 | 3.182e-03 | [FEN1, PCNA, POLA1, POLA2, POLD3, POLD4, POLE2,                                                                                                                                                                                                                                                   |

|                                                     |     |    |           |           |                                                                                                                                                                                                                                                                                                                               |
|-----------------------------------------------------|-----|----|-----------|-----------|-------------------------------------------------------------------------------------------------------------------------------------------------------------------------------------------------------------------------------------------------------------------------------------------------------------------------------|
| Maintenance(R)                                      |     |    |           |           | PRIM1, RFC2, RFC3, RFC4, RFC5, TERF1]                                                                                                                                                                                                                                                                                         |
| HIV Life Cycle(R)                                   | 103 | 29 | 4.612e-04 | 3.087e-03 | [CXCR4, FEN1, GTF2F1, NCBP1, NUP107, NUP153, NUP155, NUP205, NUP43, NUP50, NUP62, NUP85, NUP88, NUP98, POLR2K, PSIP1, RANBP1, RANBP2, RNGTT, SUPT16H, SUPT4H1, TAF10, TAF12, TAF5, TAF9, TCEB2, TCEB3, TPR, XPO1]                                                                                                             |
| Metabolism of proteins(R)                           | 187 | 45 | 4.717e-04 | 3.042e-03 | [ACTB, CCT2, DHPS, DPM3, EEF2, EIF1AX, EIF2S1, EIF2S2, EIF3D, EIF3F, EIF3G, EIF3H, EIF3K, EIF4A1, EIF4A2, EIF4B, EIF4E, EIF4G1, EIF5, EIF5A, EIF5B, PFDN5, PIGH, PIGT, RPL10, RPL14, RPL15, RPL17, RPL18A, RPL28, RPL29, RPL31, RPL36, RPL37A, RPS16, RPS17, RPS21, RPS4X, RPS9, TUBA1B, TUBA1C, TUBA4A, TUBB2C, TUBB3, VBP1] |
| DNA Repair(R)                                       | 84  | 25 | 5.121e-04 | 3.320e-03 | [BRCA2, DDB1, DDB2, FEN1, H2AFX, MBD4, MGMT, MPG, MRE11A, NBN, PCNA, POLD3, POLD4, POLE2, POLR2K, PRKDC, RAD50, RAD51, REV1, RFC2, RFC3, RFC4, RFC5, TDG, XPC]                                                                                                                                                                |
| Metabolism of non-coding RNA(R)                     | 49  | 17 | 7.827e-04 | 5.308e-03 | [NCBP1, NUP107, NUP153, NUP155, NUP205, NUP43, NUP50, NUP62, NUP85, NUP88, NUP98, RANBP2, SNRPD1, SNRPF, SNRPG, TPR, WDR77]                                                                                                                                                                                                   |
| Metabolism of amino acids(R)                        | 97  | 27 | 8.409e-04 | 5.370e-03 | [AZIN1, BCAT2, BCKDHA, CKB, DBT, FAH, GAMT, GLUD1, PSMA3, PSMA4, PSMB10, PSMB4, PSMB8, PSMB9, PSMC2, PSMC3, PSMD1, PSMD11, PSMD12, PSMD14, PSMD4, PSME1, PSME3, PSMF1, SLC7A11, SLC7A5, SLC7A6]                                                                                                                               |
| Translation(R)                                      | 119 | 31 | 1.041e-03 | 6.357e-03 | [EEF2, EIF1AX, EIF2S1, EIF2S2, EIF3D, EIF3F, EIF3G, EIF3H, EIF3K, EIF4A1, EIF4A2, EIF4B, EIF4E, EIF4G1, EIF5, EIF5B, RPL10, RPL14, RPL15, RPL17, RPL18A, RPL28, RPL29, RPL31, RPL36, RPL37A, RPS16, RPS17, RPS21, RPS4X, RPS9]                                                                                                |
| EphrinB-EPHB pathway(N)                             | 53  | 17 | 1.784e-03 | 1.179e-02 | [CRK, EFNB2, EFNB3, EPHB3, ITSN1, KRAS, MAP2K4, MAP3K7, MAPK3, PIK3CA, PTPN13, PXN, RASA1, ROCK1, RRAS, TIAM1, YES1]                                                                                                                                                                                                          |
| VEGFR1 specific signals(N)                          | 27  | 11 | 1.896e-03 | 1.230e-02 | [CALM1, CAV1, CD2AP, HSP90AA1, MAPK3, NRP1, PGF, PIK3CA, PTPN11, RASA1, VEGFB]                                                                                                                                                                                                                                                |
| control of gene expression by vitamin d receptor(B) | 16  | 8  | 2.261e-03 | 1.435e-02 | [ARID1A, BAZ1B, CHAF1A, MED1, SMARCC1, SUPT16H, TOP2B, TSC2]                                                                                                                                                                                                                                                                  |
| Metablism of nucleotides(R)                         | 56  | 17 | 3.106e-03 | 2.113e-02 | [ADA, APRT, CAD, CTPS, DPYS, GLRX, NME3, PAICS, PPAT, RRM1, RRM2, SLC25A6, TK1, TXNRD1, TYMP, TYMS, UMPS]                                                                                                                                                                                                                     |
| IL6-mediated signaling                              | 47  | 15 | 3.372e-03 | 2.270e-02 | [CEBPD, FOS, GAB2, HSP90B1, IL6R, IRF1, JUNB, MAP2K4,                                                                                                                                                                                                                                                                         |

|                                                             |     |    |           |           |                                                                                                                                                                                                                    |
|-------------------------------------------------------------|-----|----|-----------|-----------|--------------------------------------------------------------------------------------------------------------------------------------------------------------------------------------------------------------------|
| events(N)                                                   |     |    |           |           | MAPK11, PIK3CA, PTPN11, SOCS3, SOS1, STAT3, TIMP1]                                                                                                                                                                 |
| Regulation of Telomerase(N)                                 | 67  | 19 | 3.816e-03 | 2.591e-02 | [BLM, CCND1, EGFR, FOS, HSP90AA1, IRF1, MAPK3, MRE11A, NBN, PARP2, PTGES3, RAD1, RAD50, RBBP7, RPS6KB1, SAP30, TERF1, UBE3A, YWHAE]                                                                                |
| cdk regulation of dna replication(B)                        | 18  | 8  | 4.558e-03 | 3.091e-02 | [CCNE1, CDC6, MCM2, MCM3, MCM4, MCM5, MCM6, MCM7]                                                                                                                                                                  |
| Metabolism of carbohydrates(R)                              | 106 | 26 | 5.464e-03 | 3.736e-02 | [AGL, CALM1, ENO1, NUP107, NUP153, NUP155, NUP205, NUP43, NUP50, NUP62, NUP85, NUP88, NUP98, PC, PFKM, PGLS, PGM1, PKM2, PRPS1, RANBP2, SLC16A3, SLC25A12, SLC25A13, SLC2A1, TKT, TPR]                             |
| mechanism of protein import into the nucleus(B)             | 12  | 6  | 7.748e-03 | 5.337e-02 | [KPNA2, KPNB1, NUP153, NUP62, RANBP1, RANBP2]                                                                                                                                                                      |
| role of ran in mitotic spindle regulation(B)                | 12  | 6  | 7.748e-03 | 5.337e-02 | [KIF15, KPNA2, KPNB1, RANBP1, RANBP2, TPX2]                                                                                                                                                                        |
| chromatin remodeling by hswi/snf atp-dependent complexes(B) | 16  | 7  | 8.379e-03 | 5.692e-02 | [ACTB, ARID1A, GTF2F1, NF1, NR3C1, POLR1D, SMARCC1]                                                                                                                                                                |
| EPHB forward signaling(N)                                   | 38  | 12 | 8.859e-03 | 5.749e-02 | [CRK, EFNB2, EFNB3, EPHB3, ITS1N1, KRAS, MAPK3, PIK3CA, PXN, RASA1, ROCK1, RRAS]                                                                                                                                   |
| Signaling events mediated by HDAC Class II(N)               | 38  | 12 | 8.859e-03 | 5.749e-02 | [BCL6, HDAC5, HSP90AA1, NR3C1, NUP153, NUP62, RANBP2, RFXANK, SUMO1, TUBA1B, XPO1, YWHAE]                                                                                                                          |
| Arf6 signaling events(N)                                    | 139 | 31 | 9.573e-03 | 5.859e-02 | [ACAP1, ADRB2, ASAP1, ASAP2, CAV1, CD59, CLTA, CRK, EGFR, EXOC3, GNAQ, INPP5D, ITGA2B, JUP, MAPK3, PIK3CA, PLD1, PLD2, PRKCI, PRKCZ, PTPN11, PXN, RAB11A, RASA1, RPS6KB1, SDC1, SOS1, TBC1D4, TIAM1, YWHAE, YWHAH] |
| Insulin Pathway(N)                                          | 139 | 31 | 9.573e-03 | 5.859e-02 | [ACAP1, ADRB2, ASAP1, ASAP2, CAV1, CD59, CLTA, CRK, EGFR, EXOC3, GNAQ, INPP5D, ITGA2B, JUP, MAPK3, PIK3CA, PLD1, PLD2, PRKCI, PRKCZ, PTPN11, PXN, RAB11A, RASA1, RPS6KB1, SDC1, SOS1, TBC1D4, TIAM1, YWHAE, YWHAH] |
| Arf6 trafficking events(N)                                  | 139 | 31 | 9.573e-03 | 5.859e-02 | [ACAP1, ADRB2, ASAP1, ASAP2, CAV1, CD59, CLTA, CRK, EGFR, EXOC3, GNAQ, INPP5D, ITGA2B, JUP, MAPK3, PIK3CA, PLD1, PLD2, PRKCI, PRKCZ, PTPN11, PXN, RAB11A, RASA1, RPS6KB1, SDC1, SOS1, TBC1D4, TIAM1, YWHAE, YWHAH] |
| p53 signaling                                               | 54  | 15 | 1.122e-02 | 7.078e-02 | [ATR, BBC3, CCNB1, CCNB2, CHEK1, CYCS, DDB2, FAS,                                                                                                                                                                  |

|                                                                            |     |    |           |           |                                                                                                                                                                                                                                              |
|----------------------------------------------------------------------------|-----|----|-----------|-----------|----------------------------------------------------------------------------------------------------------------------------------------------------------------------------------------------------------------------------------------------|
| pathway(K)                                                                 |     |    |           |           | GTSE1, PERP, PMAIP1, RRM2, STEAP3, THBS1, TP73]                                                                                                                                                                                              |
| FAS signaling pathway (CD95)(N)                                            | 35  | 11 | 1.228e-02 | 7.726e-02 | [ARHGDI1B, FAF1, FAIM3, FAS, GSN, LMNA, MAP2K4, MAP3K7, PAK2, PRKDC, PTPN13]                                                                                                                                                                 |
| Integrins in angiogenesis(N)                                               | 65  | 17 | 1.253e-02 | 7.772e-02 | [CD44, FN1, FOS, GSN, HSP90AA1, IGF1R, MAPK3, MFGE8, PIK3C2A, PIK3CA, PTPN11, PXN, ROCK1, ROCK2, RPS6KB1, SDC1, TGFBR2]                                                                                                                      |
| il-2 receptor beta chain in t cell activation(B)                           | 45  | 13 | 1.307e-02 | 7.977e-02 | [CCNB1, CCND1, CCND2, CCNE1, FAS, FOS, MAPK3, PCNA, PIK3CA, RPS6KB1, SOCS3, SOS1, TFDP1]                                                                                                                                                     |
| cell cycle: g1/s check point(B)                                            | 22  | 8  | 1.406e-02 | 8.496e-02 | [ATR, CCND1, CCNE1, DHFR, MAPK3, PTPN11, TFDP1, TGFB1]                                                                                                                                                                                       |
| Signaling events mediated by VEGFR1 and VEGFR2(N)                          | 66  | 17 | 1.432e-02 | 8.502e-02 | [CALM1, CAV1, CD2AP, HSP90AA1, HSPB1, MAPK11, MAPK3, NRP1, PGF, PIK3CA, PTPN11, PXN, RASA1, ROCK1, SOS1, VEGFB, YES1]                                                                                                                        |
| Small cell lung cancer(K)                                                  | 61  | 16 | 1.474e-02 | 8.631e-02 | [CASP9, CCND1, CCNE1, CCNE2, CDK2, CKS1B, COL4A1, COL4A2, CYCS, FN1, ITGA2B, LAMA5, LAMB1, LAMC2, SKP2, TRAF5]                                                                                                                               |
| internal ribosome entry pathway(B)                                         | 18  | 7  | 1.510e-02 | 8.688e-02 | [CASP9, EIF4A1, EIF4E, EIF4G1, EIF4G2, EIF4G3, PTBP1]                                                                                                                                                                                        |
| IGF1 pathway(N)                                                            | 150 | 32 | 1.528e-02 | 8.623e-02 | [ACAP1, ADRB2, ASAP1, ASAP2, CAV1, CD59, CLTA, CRK, EGFR, EXOC3, GNAQ, IGF1R, INPP5D, ITGA2B, JUP, MAPK3, PIK3CA, PLD1, PLD2, PRKCI, PRKCZ, PTPN11, PXN, RAB11A, RASA1, RPS6KB1, SDC1, SOS1, TBC1D4, TIAM1, YWHAE, YWHAH]                    |
| IL2-mediated signaling events(N)                                           | 111 | 25 | 1.671e-02 | 9.530e-02 | [BIRC2, CALM1, CCNA2, CCND2, FOS, GAB2, HSP90AA1, KRAS, MALT1, MAPK11, MAPK3, NFKB2, PIK3CA, PRKCZ, PTPN11, RASA1, RELB, RPS6KB1, SMPD1, SOCS3, SOS1, STAT3, TNFAIP3, UGCG, XPO1]                                                            |
| Aurora A signaling(N)                                                      | 62  | 16 | 1.686e-02 | 9.451e-02 | [AURKA, AURKB, BIRC2, BIRC5, CENPA, DLGAP5, MALT1, NFKB2, PIK3CA, RASA1, RELB, TACC1, TACC3, TNFAIP3, TPX2, XPO1]                                                                                                                            |
| Signaling events activated by Hepatocyte Growth Factor Receptor (c-Met)(N) | 169 | 35 | 1.723e-02 | 9.543e-02 | [ACAP1, ADRB2, ASAP1, ASAP2, CAV1, CD59, CLTA, CRK, EGFR, EXOC3, FOS, GLMN, GNAQ, INPP5D, ITGA2B, JUP, MAP2K4, MAPK3, PIK3CA, PLD1, PLD2, PRKCI, PRKCZ, PTPN11, PXN, RAB11A, RASA1, RPS6KB1, SDC1, SOS1, STAT3, TBC1D4, TIAM1, YWHAE, YWHAH] |

**Suppl. Table: 4: Genes and pathways representing differences between proliferation-arrested cells in 2D and 3D.**

| Total number of differentially expressed genes: 1801 |                              |                     |           |            |                                                                                                                                                                                                                                                                                      |
|------------------------------------------------------|------------------------------|---------------------|-----------|------------|--------------------------------------------------------------------------------------------------------------------------------------------------------------------------------------------------------------------------------------------------------------------------------------|
| Pathway                                              | Number Of Protein In Pathway | Protein From Sample | P-Value   | FDR        | IDs                                                                                                                                                                                                                                                                                  |
| M Phase(R)                                           | 88                           | 38                  | 2.838e-11 | <1.000e-03 | [AHCTF1, AURKB, BIRC5, BUB1, BUB1B, BUB3, CCDC99, CDC20, CENPA, CENPE, CENPF, CENPN, CLIP1, FBXO5, KIF18A, KIF20A, KIF23, KIF2A, KIF2C, MAD2L1, MAPRE1, MLF1IP, NDC80, NUP107, NUP37, PAFAH1B1, PLK1, RAD21, RANBP2, RANGAP1, SMC1A, SMC3, SPC25, STAG1, STAG2, XPO1, ZWILCH, ZWINT] |
| Cell cycle(K)                                        | 112                          | 40                  | 1.972e-09 | <5.000e-04 | [ANAPC5, ATM, ATR, BUB1, BUB1B, BUB3, CCNA2, CCNB1, CCNB2, CCND2, CCNE2, CDC20, CDC25A, CDC25C, CDC27, CDC6, CDC7, CDK2, CHEK1, DBF4, GSK3B, MAD2L1, MCM3, MCM4, MCM5, MCM6, MCM7, MDM2, PCNA, PLK1, PRKDC, PTTG1, RB1, SKP2, SMAD4, SMC1A, TFDP1, TGFB1, YWHAB, YWHAH]              |
| Cell Cycle Checkpoints(R)                            | 108                          | 38                  | 7.415e-09 | <3.333e-04 | [ANAPC5, ATM, ATR, BUB1B, BUB3, CCNB1, CCNB2, CDC20, CDC25A, CDC25C, CDC27, CDC6, CDC7, CDK2, CHEK1, DBF4, MAD2L1, MCM10, MCM3, MCM4, MCM5, MCM6, MCM7, MDM2, PSMA3, PSMA4, PSMC2, PSMC3, PSMD1, PSMD11, PSMD12, PSMD14, PSME1, PSME3, RFC3, RFC4, RFC5, UBE2C]                      |
| Aurora B signaling(N)                                | 39                           | 19                  | 4.467e-07 | <2.500e-04 | [AURKA, AURKB, BIRC5, BUB1, CBX5, CENPA, KIF20A, KIF23, KIF2C, NCAPD2, NCAPG, NCAPH, NDC80, PSMA3, RACGAP1, RASA1, SMC2, SMC4, TACC1]                                                                                                                                                |
| G1/S Transition(R)                                   | 98                           | 32                  | 5.702e-07 | <2.000e-04 | [CCNB1, CCNE2, CDC25A, CDC6, CDC7, CDK2, DBF4, DHFR, FBXO5, MCM10, MCM3, MCM4, MCM5, MCM6, MCM7, PCNA, POLA1, POLE2, PSMA3, PSMA4, PSMC2, PSMC3, PSMD1, PSMD11, PSMD12, PSMD14, PSME1, PSME3, RB1, RRM2, TFDP1, TYMS]                                                                |
| Signaling by Aurora kinases(N)                       | 94                           | 31                  | 6.969e-07 | <1.667e-04 | [ATM, AURKA, AURKB, BIRC2, BIRC5, BUB1, CBX5, CENPA, CHUK, DLGAP5, GSK3B, IKBKB, KIF20A, KIF23, KIF2C, MALT1, MDM2, NCAPD2, NCAPG,                                                                                                                                                   |

|                                                      |     |    |           |            |                                                                                                                                                                                                                                                                                                                   |
|------------------------------------------------------|-----|----|-----------|------------|-------------------------------------------------------------------------------------------------------------------------------------------------------------------------------------------------------------------------------------------------------------------------------------------------------------------|
|                                                      |     |    |           |            | NCAPH, NDC80, PIK3CA, PSMA3, RACGAP1, RASA1, SMC2, SMC4, TACC1, TACC3, TPX2, XPO1]                                                                                                                                                                                                                                |
| DNA Replication(R)                                   | 95  | 31 | 8.661e-07 | <1.429e-04 | [CDC6, CDC7, CDK2, DBF4, FEN1, GINS1, GINS2, GMNN, MCM10, MCM3, MCM4, MCM5, MCM6, MCM7, PCNA, POLA1, POLE2, PSMA3, PSMA4, PSMC2, PSMC3, PSMD1, PSMD11, PSMD12, PSMD14, PSME1, PSME3, RB1, RFC3, RFC4, RFC5]                                                                                                       |
| APC/C-mediated degradation of cell cycle proteins(R) | 72  | 24 | 1.041e-05 | 1.250e-04  | [ANAPC5, AURKA, AURKB, BUB1B, BUB3, CCNB1, CDC20, CDC27, CDK2, FBXO5, MAD2L1, PLK1, PSMA3, PSMA4, PSMC2, PSMC3, PSMD1, PSMD11, PSMD12, PSMD14, PSME1, PSME3, PTTG1, UBE2C]                                                                                                                                        |
| FOXO1 transcription factor network(N)                | 38  | 16 | 2.094e-05 | 1.111e-04  | [AURKB, BIRC5, BRCA2, CCNB1, CCNB2, CDK2, CENPA, CENPF, CREBBP, FOS, FOXM1, NEK2, PLK1, RB1, SKP2, XRCC1]                                                                                                                                                                                                         |
| S Phase(R)                                           | 97  | 28 | 2.616e-05 | 2.000e-04  | [CDC25A, CDC6, CDK2, FEN1, GINS1, GINS2, MCM3, MCM4, MCM5, MCM6, MCM7, PCNA, POLA1, POLE2, PSMA3, PSMA4, PSMC2, PSMC3, PSMD1, PSMD11, PSMD12, PSMD14, PSME1, PSME3, RB1, RFC3, RFC4, RFC5]                                                                                                                        |
| BARD1 signaling events(N)                            | 29  | 13 | 6.564e-05 | 5.455e-04  | [ATM, ATR, BARD1, CDK2, FANCE, FANCL, MRE11A, PCNA, PRKDC, RAD50, RBBP8, TOPBP1, XRCC5]                                                                                                                                                                                                                           |
| Host Interactions of HIV factors(R)                  | 119 | 30 | 1.498e-04 | 1.167e-03  | [ARF1, CUL5, HMGA1, KPNB1, NUP107, NUP153, NUP155, NUP205, NUP37, NUP50, NUP88, NUPL1, PAK2, PSIP1, PSMA3, PSMA4, PSMC2, PSMC3, PSMD1, PSMD11, PSMD12, PSMD14, PSME1, PSME3, RANBP1, RANBP2, RANGAP1, TCEB2, TPR, XPO1]                                                                                           |
| Influenza Life Cycle(R)                              | 187 | 41 | 2.008e-04 | 1.615e-03  | [CANX, DHX9, DNAJC3, FUS, GRSF1, HNRNPA2B1, HNRNPA3, HNRNPD, HNRNPH1, HNRNPK, HNRNPM, HNRNPR, HSP90AA1, KPNB1, NCBP1, NUP107, NUP153, NUP155, NUP205, NUP37, NUP50, NUP88, NUPL1, PCBP2, POLR2K, RANBP2, RPL15, RPL18A, RPL28, RPL29, RPL31, RPL36, RPL37A, RPS17, RPS21, SMC1A, SNRPD1, SNRPF, SNRPG, TPR, XPO1] |
| HIV Life Cycle(R)                                    | 103 | 26 | 3.961e-04 | 3.714e-03  | [FEN1, HMGA1, NCBP1, NUP107, NUP153, NUP155, NUP205, NUP37, NUP50, NUP88, NUPL1, POLR2K, PSIP1, RANBP1, RANBP2, RANGAP1, RGTG, SSRP1, SUPT16H, SUPT4H1, TAF9, TCEB2, TPR, XPO1, XRCC4, XRCC5]                                                                                                                     |
| G2/M Transition(R)                                   | 81  | 22 | 4.199e-04 | 3.667e-03  | [AKAP9, ALMS1, CCNA2, CCNB1, CCNB2, CDC25A, CDC25C, CEP76, FGFR1OP, HSP90AA1, MAPRE1, NEK2,                                                                                                                                                                                                                       |

|                                               |     |    |           |           |                                                                                                                                                                                                                               |
|-----------------------------------------------|-----|----|-----------|-----------|-------------------------------------------------------------------------------------------------------------------------------------------------------------------------------------------------------------------------------|
|                                               |     |    |           |           | PAFAH1B1, PCM1, PLK1, PLK4, TUBA4A, TUBB, TUBB2C, TUBGCP3, TUBGCP4, XPO1]                                                                                                                                                     |
| Apoptosis(R)                                  | 124 | 29 | 6.299e-04 | 5.250e-03 | [APC, BIRC2, CASP3, CDH1, CFLAR, CYCS, DSG2, KPNB1, LMNB1, MAPT, MST4, OCLN, PAK2, PMAIP1, PSMA3, PSMA4, PSMC2, PSMC3, PSMD1, PSMD11, PSMD12, PSMD14, PSME1, PSME3, ROCK1, TFDP1, TJP1, TNFRSF10B, YWHAB]                     |
| Aurora A signaling(N)                         | 62  | 18 | 6.466e-04 | 5.059e-03 | [ATM, AURKA, AURKB, BIRC2, BIRC5, CENPA, CHUK, DLGAP5, GSK3B, IKBKB, MALT1, MDM2, PIK3CA, RASA1, TACC1, TACC3, TPX2, XPO1]                                                                                                    |
| DNA Repair(R)                                 | 84  | 22 | 6.733e-04 | 5.222e-03 | [ATM, BRCA2, ERCC1, FEN1, H2AFX, MBD4, MGMT, MRE11A, PCNA, POLE2, POLR2K, PRKDC, RAD23B, RAD50, REV1, RFC3, RFC4, RFC5, TDG, XRCC1, XRCC4, XRCC5]                                                                             |
| role of ran in mitotic spindle regulation(B)  | 12  | 7  | 7.070e-04 | 5.368e-03 | [KIF15, KPNA2, KPNB1, RANBP1, RANBP2, RANGAP1, TPX2]                                                                                                                                                                          |
| Signaling events mediated by HDAC Class II(N) | 38  | 13 | 8.414e-04 | 6.250e-03 | [GNB1, HDAC5, HSP90AA1, NCOR2, NR3C1, NUP153, RANBP2, RANGAP1, SUMO1, TUBA1B, UBE2I, XPO1, YWHAB]                                                                                                                             |
| eukaryotic protein translation(B)             | 13  | 7  | 1.119e-03 | 9.095e-03 | [EIF2S2, EIF4A1, EIF4E, EIF4G1, EIF4G2, EIF4G3, EIF5]                                                                                                                                                                         |
| TNF alpha/NF-kB(C)                            | 136 | 30 | 1.263e-03 | 1.050e-02 | [ACTL6A, BIRC2, CASP3, CFLAR, CHUK, CREBBP, CSNK2A2, DDX3X, GSK3B, HSP90AA1, IKBKAP, IKBKB, KPNA2, KPNA3, KTN1, MAP2K5, MCM5, MCM7, POLR1D, PRKCZ, PSMC2, PSMC3, PSMD1, PSMD12, PTPN11, RPS6KB1, TRAF5, YWHAB, YWHAH, ZFAND5] |
| FAS signaling pathway (CD95)(N)               | 35  | 12 | 1.288e-03 | 1.052e-02 | [ARHGDIB, CASP3, CFLAR, CHUK, FAIM3, MAP2K4, MAP3K7, MET, PAK2, PRKDC, PTPN13, RB1]                                                                                                                                           |
| M/G1 Transition(R)                            | 61  | 17 | 1.389e-03 | 1.088e-02 | [CDC6, GMNN, MCM3, MCM4, MCM5, MCM6, MCM7, PSMA3, PSMA4, PSMC2, PSMC3, PSMD1, PSMD11, PSMD12, PSMD14, PSME1, PSME3]                                                                                                           |
| internal ribosome entry pathway(B)            | 18  | 8  | 1.700e-03 | 1.272e-02 | [CASP1, CASP3, EIF4A1, EIF4E, EIF4G1, EIF4G2, EIF4G3, PTBP2]                                                                                                                                                                  |
| TNF receptor signaling pathway(N)             | 272 | 50 | 2.102e-03 | 1.615e-02 | [AIFM1, APP, ARHGDIB, ATM, BIRC2, CALM1, CASP1, CASP3, CHUK, CREB1, CREBBP, CSNK1A1, CYCS, DDIT3, EIF4E, ELK4, FKBP1A, FOS, GDI1, GSK3B, IKBKB, IL8, KPNA2, KPNB1, LMNB1, LMNB2, MALT1, MAP2K4,                               |



|                                                               |     |    |           |           |                                                                                                                                                                                                                                                                                  |
|---------------------------------------------------------------|-----|----|-----------|-----------|----------------------------------------------------------------------------------------------------------------------------------------------------------------------------------------------------------------------------------------------------------------------------------|
|                                                               |     |    |           |           | MAP3K7, MAP4K3, MAP4K5, MAPKAPK5, NFATC1, PAK2, PAWR, PIK3CA, PLA2G4A, PRKCI, PRKCZ, PTPRK, RALA, RB1, SLK, SMPD1, TOP1, TSC2, XPO1, YES1, YWHAB, YWHAH]                                                                                                                         |
| Sumoylation by RanBP2 regulates transcriptional repression(N) | 15  | 7  | 2.488e-03 | 1.926e-02 | [MDM2, NUP153, RANBP2, RANGAP1, SUMO1, UBE2I, XPO1]                                                                                                                                                                                                                              |
| Class I PI3K signaling events mediated by Akt(N)              | 94  | 22 | 2.687e-03 | 2.111e-02 | [ATM, BIRC2, CHUK, CREBBP, EEF2, EIF4A1, EIF4E, EIF4G1, FKBP1A, GSK3B, HSP90AA1, IKBKB, MALT1, MDM2, PIK3CA, PRKDC, RPS6KB1, TBC1D4, TSC2, XPO1, YWHAB, YWHAH]                                                                                                                   |
| Metabolism of non-coding RNA(R)                               | 49  | 14 | 2.840e-03 | 2.152e-02 | [NCBP1, NUP107, NUP153, NUP155, NUP205, NUP37, NUP50, NUP88, NUPL1, RANBP2, SNRPD1, SNRPF, SNRPG, TPR]                                                                                                                                                                           |
| Transport of Mature Transcript to Cytoplasm(R)                | 55  | 15 | 3.149e-03 | 2.357e-02 | [EIF4E, MAGOH, NCBP1, NUP107, NUP153, NUP155, NUP205, NUP37, NUP50, NUP88, NUPL1, RANBP2, SLBP, TPR, UPF3B]                                                                                                                                                                      |
| IL1-mediated signaling events(N)                              | 204 | 39 | 3.319e-03 | 2.406e-02 | [ATM, BIRC2, CALM1, CASP1, CASP3, CHUK, CREB1, CREBBP, CSNK1A1, DDIT3, EIF4E, ELK4, FKBP1A, FOS, GDI1, GSK3B, IKBKB, IL1R1, IL8, KPNA2, KPNB1, MALT1, MAP2K4, MAP3K7, MAPKAPK5, NFATC1, PAK2, PIK3CA, PLA2G4A, PRKCI, PRKCZ, PTPRK, RALA, TSC2, UBE2N, XPO1, YES1, YWHAB, YWHAH] |
| control of gene expression by vitamin d receptor(B)           | 16  | 7  | 3.534e-03 | 2.475e-02 | [ACTL6A, ARID1A, MED1, SMARCC1, SUPT16H, TOP2B, TSC2]                                                                                                                                                                                                                            |
| mechanism of protein import into the nucleus(B)               | 12  | 6  | 3.573e-03 | 2.424e-02 | [KPNA2, KPNB1, NUP153, RANBP1, RANBP2, RANGAP1]                                                                                                                                                                                                                                  |
| Metabolism of amino acids(R)                                  | 97  | 22 | 3.870e-03 | 2.626e-02 | [BCKDHA, CKB, DBT, DLD, FAH, GLUD1, MAT2A, NQO1, ODC1, PSMA3, PSMA4, PSMC2, PSMC3, PSMD1, PSMD11, PSMD12, PSMD14, PSME1, PSME3, SLC7A11, SLC7A5, SLC7A8]                                                                                                                         |
| Metabolism of carbohydrates(R)                                | 106 | 23 | 5.355e-03 | 3.766e-02 | [AGL, CALM1, DLAT, DLD, ENO1, GYG1, MDH2, NUP107, NUP153, NUP155, NUP205, NUP37, NUP50, NUP88, NUPL1, PDHX, PFKM, PGD, PGLS, PRPS1, RANBP2, SLC16A3, TPR]                                                                                                                        |
| TRAIL signaling                                               | 323 | 55 | 6.150e-03 | 4.319e-02 | [AIFM1, APP, ARF1, ARHGDI, ATM, BIRC2, CALM1, CASP1, CASP3, CFLAR,                                                                                                                                                                                                               |

|                                                            |     |    |           |           |                                                                                                                                                                                                                                                                                                                                                                   |
|------------------------------------------------------------|-----|----|-----------|-----------|-------------------------------------------------------------------------------------------------------------------------------------------------------------------------------------------------------------------------------------------------------------------------------------------------------------------------------------------------------------------|
| pathway(N)                                                 |     |    |           |           | CHUK, CREBBP, CSNK1A1, CYCS, EEF2, EIF4A1, EIF4E, EIF4G1, FKBP1A, FOS, GSK3B, HSP90AA1, IBTK, IKBKB, IL8, KPNA2, KPNB1, KRAS, LMNB1, LMNB2, MALT1, MAP2K4, MAP3K7, MDM2, NFATC1, PAWR, PIK3CA, PPP3CA, PRKCZ, PRKDC, PTPRK, RASA1, RB1, RPS6KB1, SLK, SMPD1, SOS1, TBC1D4, TNFRSF10B, TOP1, TSC2, XPO1, YES1, YWHAB, YWHAH]                                       |
| Regulation of cytoplasmic and nuclear SMAD2/3 signaling(N) | 289 | 50 | 6.619e-03 | 4.333e-02 | [ATM, CALM1, CASP3, CBFB, CDK2, CREB1, CREBBP, CSNK1A1, CTBP1, DDIT3, DYNLRB1, EIF4E, ELK4, FKBP1A, FOS, GDI1, GSK3B, HSPA8, IL8, KPNA2, KPNB1, MAP2K4, MAP3K7, MAPK13, MAPKAPK5, MAPT, NFATC1, NR3C1, NUP153, OCLN, PAK2, PLA2G4A, PPP2CA, PRKCZ, PTPRK, RALA, RBBP7, RPS6KB1, SAP30, SMAD4, SMURF2, SOS1, SPTBN1, TGFB2, TSC2, UBE2I, YAP1, YES1, YWHAB, YWHAH] |
| Regulation of nuclear SMAD2/3 signaling(N)                 | 289 | 50 | 6.619e-03 | 4.333e-02 | [ATM, CALM1, CASP3, CBFB, CDK2, CREB1, CREBBP, CSNK1A1, CTBP1, DDIT3, DYNLRB1, EIF4E, ELK4, FKBP1A, FOS, GDI1, GSK3B, HSPA8, IL8, KPNA2, KPNB1, MAP2K4, MAP3K7, MAPK13, MAPKAPK5, MAPT, NFATC1, NR3C1, NUP153, OCLN, PAK2, PLA2G4A, PPP2CA, PRKCZ, PTPRK, RALA, RBBP7, RPS6KB1, SAP30, SMAD4, SMURF2, SOS1, SPTBN1, TGFB2, TSC2, UBE2I, YAP1, YES1, YWHAB, YWHAH] |
| TGF-beta receptor signaling(N)                             | 289 | 50 | 6.619e-03 | 4.333e-02 | [ATM, CALM1, CASP3, CBFB, CDK2, CREB1, CREBBP, CSNK1A1, CTBP1, DDIT3, DYNLRB1, EIF4E, ELK4, FKBP1A, FOS, GDI1, GSK3B, HSPA8, IL8, KPNA2, KPNB1, MAP2K4, MAP3K7, MAPK13, MAPKAPK5, MAPT, NFATC1, NR3C1, NUP153, OCLN, PAK2, PLA2G4A, PPP2CA, PRKCZ, PTPRK, RALA, RBBP7, RPS6KB1, SAP30, SMAD4, SMURF2, SOS1, SPTBN1, TGFB2, TSC2, UBE2I, YAP1, YES1, YWHAB, YWHAH] |
| Signaling by Wnt(R)                                        | 50  | 13 | 8.351e-03 | 5.710e-02 | [APC, CSNK1A1, GSK3B, PSMA3, PSMA4, PSMC2, PSMC3, PSMD1, PSMD11, PSMD12, PSMD14, PSME1, PSME3]                                                                                                                                                                                                                                                                    |
| Metablism of nucleotides(R)                                | 56  | 14 | 8.753e-03 | 5.937e-02 | [AK2, APRT, DCK, DGUOK, HPRT1, NME3, NME4, PAICS, RRM1, RRM2, TK1, TXNRD1, TYMS, UPP1]                                                                                                                                                                                                                                                                            |
| IFN-gamma pathway(N)                                       | 373 | 61 | 9.140e-03 | 6.107e-02 | [ATM, CALM1, CASP1, CASP3, CBFB, CDK2, CREB1, CREBBP, CSNK1A1, CTBP1, DDIT3, DYNLRB1, EEF2, EIF4A1, EIF4E, EIF4G1, ELK4, FCER2, FKBP1A, FOS, GDI1, GSK3B, HMGA1, HSPA8, IL13RA1, IL8, IRF9, KPNA2, KPNB1,                                                                                                                                                         |

|                                                                       |     |    |           |           |                                                                                                                                                                                                                                                                                                                                                                                                                                                                                                        |
|-----------------------------------------------------------------------|-----|----|-----------|-----------|--------------------------------------------------------------------------------------------------------------------------------------------------------------------------------------------------------------------------------------------------------------------------------------------------------------------------------------------------------------------------------------------------------------------------------------------------------------------------------------------------------|
|                                                                       |     |    |           |           | MAP2K4, MAP3K7, MAPK13, MAPKAPK5, MAPT, MYBL1, NFATC1, NR3C1, NUP153, OCLN, PAK2, PIK3CA, PLA2G4A, PPP2CA, PRKCZ, PTPN11, PTPRK, RALA, RBBP7, RPS6KB1, SAP30, SMAD4, SMURF2, SOS1, SPTBN1, TGFBR2, TSC2, UBE2I, YAP1, YES1, YWHAB, YWHAH]                                                                                                                                                                                                                                                              |
| Alpha6Beta4Integrin(C)                                                | 45  | 12 | 9.160e-03 | 5.986e-02 | [CASP3, DST, EGFR, EIF4E, ERBB2IP, ITGA6, ITGB4, MET, PIK3CA, YES1, YWHAB, YWHAH]                                                                                                                                                                                                                                                                                                                                                                                                                      |
| mechanism of gene regulation by peroxisome proliferators via ppara(B) | 40  | 11 | 9.958e-03 | 6.427e-02 | [CPT1A, CREBBP, DUT, FAT1, HSP90AA1, ME1, MED1, NCOR2, NR1H3, NRIP1, RB1]                                                                                                                                                                                                                                                                                                                                                                                                                              |
| Formation and Maturation of mRNA Transcript(R)                        | 152 | 29 | 1.069e-02 | 6.769e-02 | [DHX9, FUS, HNRNPA2B1, HNRNPA3, HNRNPD, HNRNPH1, HNRNPK, HNRNPM, HNRNPR, MAGOH, METTL3, NCBP1, NHP2L1, PAPOLA, PCBP2, POLR2K, RNGTT, SF3B1, SMC1A, SNRPA1, SNRPD1, SNRPF, SNRPG, SSRP1, SUPT16H, SUPT4H1, TAF9, TCEB2, UPF3B]                                                                                                                                                                                                                                                                          |
| FoxO family signaling(N)                                              | 46  | 12 | 1.074e-02 | 6.674e-02 | [CCNB1, CDK2, CREBBP, CSNK1A1, PLK1, RALA, SKP2, USP7, XPO1, YWHAB, YWHAH, ZFAND5]                                                                                                                                                                                                                                                                                                                                                                                                                     |
| Glypican 1 network(N)                                                 | 436 | 69 | 1.154e-02 | 7.096e-02 | [APP, ARF1, ATM, BIRC2, CALM1, CASP3, CBF3, CDK2, CHUK, CREB1, CREBBP, CSNK1A1, CTBP1, DDIT3, DYNLRB1, EEF2, EIF4A1, EIF4E, EIF4G1, ELK4, FKBP1A, FOS, GDI1, GSK3B, HSP90AA1, HSPA8, IBTK, IKBKB, IL8, KPNA2, KPNB1, KRAS, MALT1, MAP2K4, MAP3K7, MAPK13, MAPKAPK5, MAPT, MDM2, NFATC1, NR3C1, NUP153, OCLN, PAK2, PIK3CA, PLA2G4A, PPP2CA, PPP3CA, PRKCZ, PRKDC, PTPRK, RALA, RASA1, RBBP7, RPS6KB1, SAP30, SMAD4, SMURF2, SOS1, SPTBN1, TBC1D4, TGFBR2, TSC2, UBE2I, XPO1, YAP1, YES1, YWHAB, YWHAH] |
| a6b1 and a6b4 Integrin signaling(N)                                   | 47  | 12 | 1.252e-02 | 7.623e-02 | [CASP3, CDH1, EGFR, ITGA6, ITGB4, LAMA5, LAMB1, MET, PIK3CA, RPS6KB1, YWHAB, YWHAH]                                                                                                                                                                                                                                                                                                                                                                                                                    |
| IL2 signaling events mediated by PI3K(N)                              | 65  | 15 | 1.330e-02 | 8.014e-02 | [ATM, BIRC2, CALM1, CHUK, HSP90AA1, IKBKB, MALT1, PIK3CA, PRKCZ, PTPN11, RPS6KB1, SMPD1, SOS1, UGCG, XPO1]                                                                                                                                                                                                                                                                                                                                                                                             |
| chromatin remodeling by hswi/snf atp-                                 | 16  | 6  | 1.354e-02 | 8.010e-02 | [ACTB, ARID1A, NF1, NR3C1, POLR1D, SMARCC1]                                                                                                                                                                                                                                                                                                                                                                                                                                                            |

|                                                         |     |    |           |           |                                                                                                                                                                                                                                                                                                                                                                                                                                                                                                                               |
|---------------------------------------------------------|-----|----|-----------|-----------|-------------------------------------------------------------------------------------------------------------------------------------------------------------------------------------------------------------------------------------------------------------------------------------------------------------------------------------------------------------------------------------------------------------------------------------------------------------------------------------------------------------------------------|
| dependent complexes(B)                                  |     |    |           |           |                                                                                                                                                                                                                                                                                                                                                                                                                                                                                                                               |
| nfbk activation by nontypeable hemophilus influenzae(B) | 26  | 8  | 1.427e-02 | 8.404e-02 | [CHUK, IKBKB, IL8, MAP3K7, NR3C1, SMAD4, TGFB1, TGFB2]                                                                                                                                                                                                                                                                                                                                                                                                                                                                        |
| Signaling events mediated by HDAC Class I(N)            | 97  | 20 | 1.484e-02 | 8.658e-02 | [CREBBP, GNB1, HDAC5, HSP90AA1, MBD2, NCOR2, NR3C1, NUP153, RANBP2, RANGAP1, RBBP7, SAP30, SIRT2, STAT3, SUMO1, TUBA1B, UBE2I, XPO1, YWHAB, YY1]                                                                                                                                                                                                                                                                                                                                                                              |
| Glypican pathway(N)                                     | 472 | 73 | 1.543e-02 | 8.889e-02 | [APC, APP, ARF1, ATM, BIRC2, CALM1, CASP3, CBF3, CDK2, CHUK, CREB1, CREBBP, CSNK1A1, CTBP1, DDIT3, DYNLRB1, EEF2, EIF4A1, EIF4E, EIF4G1, ELK4, FKBP1A, FOS, FZD6, GDI1, GNB1, GSK3B, HSP90AA1, HSPA8, IBTK, IKBKB, IL8, KPNA2, KPNB1, KRAS, MACF1, MALT1, MAP2K4, MAP3K7, MAPK13, MAPKAPK5, MAPT, MDM2, NFATC1, NR3C1, NUP153, OCLN, PAK2, PIK3CA, PLA2G4A, PPP2CA, PPP3CA, PRKCZ, PRKDC, PTPRK, RALA, RASA1, RBBP7, RPS6KB1, SAP30, SMAD4, SMURF2, SOS1, SPTBN1, TBC1D4, TGFB2, TSC2, UBE2I, XPO1, YAP1, YES1, YWHAB, YWHAH] |
| IL2-mediated signaling events(N)                        | 111 | 22 | 1.649e-02 | 9.467e-02 | [ATM, BIRC2, CALM1, CCNA2, CCND2, CHUK, FOS, HSP90AA1, IKBKB, KRAS, MALT1, PIK3CA, PRKCZ, PTPN11, RASA1, RPS6KB1, SMPD1, SOS1, STAM2, STAT3, UGCG, XPO1]                                                                                                                                                                                                                                                                                                                                                                      |
